# Supplementary material
Source: publisher figshare collection journal article supplement (https://brill.figshare.com/articles/dataset/_/5858058)
Supplement: Supplementary file 1 [file 2]

## Sheet: Title page
The distributions of the six species constituting the smooth newt species complex (Lissotriton vulgaris sensu lato and L. montandoni) – an addition to the New Atlas of Amphibians and Reptiles of Europe
Ben Wielstra1,2,3,*, Daniele Canestrelli4, Milena Cvijanović5, Mathieu Denoël6, Anna Fijarczyk7,8, Daniel Jablonski9, Marcin Liana10, Borislav Naumov11, Kurtuluş Olgun12, Maciej Pabijan13, Alice Pezzarossa4, Georgi Popgeorgiev14, Daniele Salvi15,16, Yali Si17,18, Neftalí Sillero19, Konstantinos Sotiropoulos20, Piotr Zieliński7, Wiesław Babik7
1 - Department of Ecology and Evolutionary Biology, University of California, Los Angeles, CA 90095, USA. 2 - Department of Animal and Plant Sciences, University of Sheffield, S10 2TN Sheffield, UK. 3 - Naturalis Biodiversity Center, P.O. Box 9517, 2300 RA Leiden, The Netherlands. 4 - Department of Ecological and Biological Science, Tuscia University, 01100 Viterbo, Italy. 5 - Department of Evolu…
* Corresponding author; e-mail: ben.wielstra@naturalis.nl

## Sheet: Table S1
Table S1. Results of the Admixture analysis for the smooth newt species complex (Lissotriton vulgaris sensu lato and L. montandoni)
						Detailed output									Simplified output						Simplified, population average
Species	ID	Country	Locality	Latitude	Longitude	L. graecus	L. kosswigi	L. lantzi	L. montandoni	L. schmidtleri	L. vulgaris ampelensis	L. vulgaris meridionalis	L. v. vulgaris North	L. v. vulgaris South	L. graecus	L. kosswigi	L. lantzi	L. montandoni	L. schmidtleri	L. vulgaris	L. graecus	L. kosswigi	L. lantzi	L. montandoni	L. schmidtleri	L. vulgaris
L. graecus	10262	Albania	Apollonia	40.7175	19.476	0.999907	1.3e-05	1.6e-05	1e-05	1e-05	1e-05	1.4e-05	1e-05	1e-05	0.999907	1.3e-05	1.6e-05	1e-05	1e-05	4.4e-05	0.999907	1.3e-05	1.6e-05	1e-05	1e-05	4.4e-05
L. graecus	3245	Albania	Borsh	40.05	19.85	0.997977	0.001944	2e-05	1e-05	1e-05	1e-05	1e-05	1e-05	1e-05	0.997977	0.001944	2e-05	1e-05	1e-05	4e-05	0.997977	0.001944	2e-05	1e-05	1e-05	4e-05
L. graecus	3223	Albania	Fushë-Krujë	41.529	19.682	0.99992	1e-05	1e-05	1e-05	1e-05	1e-05	1e-05	1e-05	1e-05	0.99992	1e-05	1e-05	1e-05	1e-05	4e-05	0.99992	1e-05	1e-05	1e-05	1e-05	4e-05
L. graecus	4650	Albania	Fushë-Milot	41.6582	19.6729	0.999916	1e-05	1.4e-05	1e-05	1e-05	1e-05	1e-05	1e-05	1e-05	0.999916	1e-05	1.4e-05	1e-05	1e-05	4e-05	0.999916	1e-05	1.4e-05	1e-05	1e-05	4e-05
L. graecus	4597	Albania	Gjonce	40.5544	19.655	0.990059	1e-05	1e-05	0.009871	1e-05	1e-05	1e-05	1e-05	1e-05	0.990059	1e-05	1e-05	0.009871	1e-05	4e-05	0.990059	1e-05	1e-05	0.009871	1e-05	4e-05
L. graecus	3284	Albania	Gracen	41.157	19.949	0.99992	1e-05	1e-05	1e-05	1e-05	1e-05	1e-05	1e-05	1e-05	0.99992	1e-05	1e-05	1e-05	1e-05	4e-05	0.99992	1e-05	1e-05	1e-05	1e-05	4e-05
L. graecus	3218	Albania	Gur i Zi	42.284	19.569	0.974875	1e-05	0.002652	1e-05	1e-05	1e-05	1e-05	1e-05	0.022413	0.974875	1e-05	0.002652	1e-05	1e-05	0.022443	0.974875	1e-05	0.002652	1e-05	1e-05	0.022443
L. graecus	4687	Albania	Kolsh	42.072	20.326	0.99992	1e-05	1e-05	1e-05	1e-05	1e-05	1e-05	1e-05	1e-05	0.99992	1e-05	1e-05	1e-05	1e-05	4e-05	0.99992	1e-05	1e-05	1e-05	1e-05	4e-05
L. graecus	4567	Albania	Memaliaj	40.3458	19.9624	0.989675	1e-05	1e-05	1e-05	1e-05	1.3e-05	0.010253	1e-05	1e-05	0.989675	1e-05	1e-05	1e-05	1e-05	0.010286	0.989675	1e-05	1e-05	1e-05	1e-05	0.010286
L. graecus	4561	Albania	Mursi	39.6975	20.1035	0.989845	0.010085	1e-05	1e-05	1e-05	1e-05	1e-05	1e-05	1e-05	0.989845	0.010085	1e-05	1e-05	1e-05	4e-05	0.989845	0.010085	1e-05	1e-05	1e-05	4e-05
L. graecus	4676	Albania	Myc-Has	42.1048	20.3529	0.992547	1e-05	1e-05	1e-05	1e-05	1e-05	0.007383	1e-05	1e-05	0.992547	1e-05	1e-05	1e-05	1e-05	0.007413	0.992547	1e-05	1e-05	1e-05	1e-05	0.007413
L. graecus	3241	Albania	Orik	40.31	19.458	0.985494	1e-05	1e-05	0.014436	1e-05	1e-05	1e-05	1e-05	1e-05	0.985494	1e-05	1e-05	0.014436	1e-05	4e-05	0.985494	1e-05	1e-05	0.014436	1e-05	4e-05
L. graecus	10270	Albania	Shelegur-Gërmenj	40.1814	20.6744	0.983051	1.9e-05	1e-05	0.01687	1e-05	1e-05	1e-05	1e-05	1e-05	0.983051	1.9e-05	1e-05	0.01687	1e-05	4e-05	0.983051	1.9e-05	1e-05	0.01687	1e-05	4e-05
L. graecus	10733	Albania	Steblevë	41.3353	20.4767	0.99992	1e-05	1e-05	1e-05	1e-05	1e-05	1e-05	1e-05	1e-05	0.99992	1e-05	1e-05	1e-05	1e-05	4e-05	0.99992	1e-05	1e-05	1e-05	1e-05	4e-05
L. graecus	10255	Albania	Vagalat2	39.7701	20.1203	0.974833	0.017365	1e-05	1e-05	1e-05	1e-05	1e-05	1e-05	0.007742	0.974833	0.017365	1e-05	1e-05	1e-05	0.007772	0.974833	0.017365	1e-05	1e-05	1e-05	0.007772
L. graecus	4265	Bosnia and Herzegovina	Domanovići	43.1336	17.8026	0.999916	1e-05	1e-05	1e-05	1e-05	1e-05	1.4e-05	1e-05	1e-05	0.999916	1e-05	1e-05	1e-05	1e-05	4.4e-05	0.999916	1e-05	1e-05	1e-05	1e-05	4.4e-05
L. graecus	4241	Bosnia and Herzegovina	Moševići	42.9327	17.6842	0.992374	1e-05	1e-05	1e-05	1e-05	1e-05	1e-05	1e-05	0.007556	0.992374	1e-05	1e-05	1e-05	1e-05	0.007586	0.992374	1e-05	1e-05	1e-05	1e-05	0.007586
L. graecus	5564	Bulgaria	Parvomay	41.4098	23.1375	0.905559	1e-05	1e-05	0.001954	0.006755	0.014612	0.004461	0.007662	0.058977	0.905559	1e-05	1e-05	0.001954	0.006755	0.085712	0.905559	1e-05	1e-05	0.001954	0.006755	0.085712
L. graecus	542	Greece	Ano Kalliniki	40.8544	21.4506	0.986509	1e-05	1e-05	0.013421	1e-05	1e-05	1e-05	1e-05	1e-05	0.986509	1e-05	1e-05	0.013421	1e-05	4e-05	0.986509	1e-05	1e-05	0.013421	1e-05	4e-05
L. graecus	4128	Greece	Ano Pedina	39.8634	20.709	0.99992	1e-05	1e-05	1e-05	1e-05	1e-05	1e-05	1e-05	1e-05	0.99992	1e-05	1e-05	1e-05	1e-05	4e-05	0.99992	1e-05	1e-05	1e-05	1e-05	4e-05
L. graecus	3464	Greece	Archangelos	41.087	22.3	0.998487	0.001443	1e-05	1e-05	1e-05	1e-05	1e-05	1e-05	1e-05	0.998487	0.001443	1e-05	1e-05	1e-05	4e-05	0.998487	0.001443	1e-05	1e-05	1e-05	4e-05
L. graecus	4101	Greece	Archontochori	38.697	21.0393	0.965747	0.00275	0.025861	1e-05	1e-05	1e-05	0.00559	1.2e-05	1e-05	0.965747	0.00275	0.025861	1e-05	1e-05	0.005622	0.965747	0.00275	0.025861	1e-05	1e-05	0.005622
L. graecus	3453	Greece	Efkarpia	41.052	22.898	0.885363	1e-05	1e-05	0.097667	0.01691	1e-05	1e-05	1e-05	1e-05	0.885363	1e-05	1e-05	0.097667	0.01691	4e-05	0.885363	1e-05	1e-05	0.097667	0.01691	4e-05
L. graecus	3983	Greece	Girtoni	39.7355	22.4696	0.99992	1e-05	1e-05	1e-05	1e-05	1e-05	1e-05	1e-05	1e-05	0.99992	1e-05	1e-05	1e-05	1e-05	4e-05	0.99992	1e-05	1e-05	1e-05	1e-05	4e-05
L. graecus	5248	Greece	Kalavryta	38.0273	22.0455	0.866725	0.090376	0.023633	0.014759	1e-05	0.004459	1e-05	1.8e-05	1e-05	0.866725	0.090376	0.023633	0.014759	1e-05	0.004497	0.866725	0.090376	0.023633	0.014759	1e-05	0.004497
L. graecus	491	Greece	Kentriko	41.1603	22.8925	0.95393	1e-05	1e-05	1e-05	1e-05	1e-05	1e-05	0.006097	0.039913	0.95393	1e-05	1e-05	1e-05	1e-05	0.04603	0.95393	1e-05	1e-05	1e-05	1e-05	0.04603
L. graecus	10731	Greece	Kerkini	41.2213	23.0942	0.807614	1e-05	1e-05	1e-05	0.059915	1e-05	1e-05	1.1e-05	0.13241	0.807614	1e-05	1e-05	1e-05	0.059915	0.132441	0.807614	1e-05	1e-05	1e-05	0.059915	0.132441
L. graecus	4114	Greece	Kleisoura	39.3624	20.8866	0.99992	1e-05	1e-05	1e-05	1e-05	1e-05	1e-05	1e-05	1e-05	0.99992	1e-05	1e-05	1e-05	1e-05	4e-05	0.99992	1e-05	1e-05	1e-05	1e-05	4e-05
L. graecus	10809	Greece	Koridallos	39.8227	21.3474	0.99992	1e-05	1e-05	1e-05	1e-05	1e-05	1e-05	1e-05	1e-05	0.99992	1e-05	1e-05	1e-05	1e-05	4e-05	0.99992	1e-05	1e-05	1e-05	1e-05	4e-05
L. graecus	4091	Greece	Lapas	38.1115	21.4099	0.94361	0.056203	1e-05	1e-05	1e-05	0.000127	1e-05	1e-05	1e-05	0.94361	0.056203	1e-05	1e-05	1e-05	0.000157	0.94361	0.056203	1e-05	1e-05	1e-05	0.000157
L. graecus	4044	Greece	Milia	37.5958	22.4087	0.895655	0.085737	0.018544	1e-05	1e-05	1e-05	1e-05	1.4e-05	1e-05	0.895655	0.085737	0.018544	1e-05	1e-05	4.4e-05	0.895655	0.085737	0.018544	1e-05	1e-05	4.4e-05
L. graecus	3476	Greece	Omalo	40.892	22.413	0.99992	1e-05	1e-05	1e-05	1e-05	1e-05	1e-05	1e-05	1e-05	0.99992	1e-05	1e-05	1e-05	1e-05	4e-05	0.99992	1e-05	1e-05	1e-05	1e-05	4e-05
L. graecus	4511	Greece	Paliambela	38.9087	20.97	0.99992	1e-05	1e-05	1e-05	1e-05	1e-05	1e-05	1e-05	1e-05	0.99992	1e-05	1e-05	1e-05	1e-05	4e-05	0.99992	1e-05	1e-05	1e-05	1e-05	4e-05
L. graecus	3438	Greece	Pefkodasos	41.03	22.58	0.938563	1e-05	1e-05	0.043213	1e-05	1e-05	0.018164	1e-05	1e-05	0.938563	1e-05	1e-05	0.043213	1e-05	0.018194	0.938563	1e-05	1e-05	0.043213	1e-05	0.018194
L. graecus	3483	Greece	Pythio	40.089	22.208	0.869297	1e-05	1e-05	0.130633	1e-05	1e-05	1e-05	1e-05	1e-05	0.869297	1e-05	1e-05	0.130633	1e-05	4e-05	0.869297	1e-05	1e-05	0.130633	1e-05	4e-05
L. graecus	4056	Greece	Sagaiika	38.1041	21.4691	0.945097	0.054833	1e-05	1e-05	1e-05	1e-05	1e-05	1e-05	1e-05	0.945097	0.054833	1e-05	1e-05	1e-05	4e-05	0.945097	0.054833	1e-05	1e-05	1e-05	4e-05
L. graecus	506	Greece	Seli	40.5675	22.0222	0.999909	1.9e-05	1e-05	1e-05	1e-05	1e-05	1.2e-05	1e-05	1e-05	0.999909	1.9e-05	1e-05	1e-05	1e-05	4.2e-05	0.999909	1.9e-05	1e-05	1e-05	1e-05	4.2e-05
L. graecus	4008	Greece	Thavmako	39.145	22.2763	0.99992	1e-05	1e-05	1e-05	1e-05	1e-05	1e-05	1e-05	1e-05	0.99992	1e-05	1e-05	1e-05	1e-05	4e-05	0.99992	1e-05	1e-05	1e-05	1e-05	4e-05
L. graecus	10814	Greece	Theodoroi	39.9703	21.5247	0.99992	1e-05	1e-05	1e-05	1e-05	1e-05	1e-05	1e-05	1e-05	0.99992	1e-05	1e-05	1e-05	1e-05	4e-05	0.99992	1e-05	1e-05	1e-05	1e-05	4e-05
L. graecus	3477	Greece	Trilofos	40.358	22.477	0.986163	1e-05	1e-05	0.013767	1e-05	1e-05	1e-05	1e-05	1e-05	0.986163	1e-05	1e-05	0.013767	1e-05	4e-05	0.986163	1e-05	1e-05	0.013767	1e-05	4e-05
L. graecus	10807	Greece	Vassiliki	38.6278	20.6111	0.998719	1e-05	1e-05	1e-05	1e-05	0.001211	1e-05	1e-05	1e-05	0.998719	1e-05	1e-05	1e-05	1e-05	0.001241	0.998719	1e-05	1e-05	1e-05	1e-05	0.001241
L. graecus	4054	Greece	Zevgolateis	37.2535	21.9776	0.825513	0.073489	0.021317	0.057926	1e-05	0.021706	1e-05	1.9e-05	1e-05	0.825513	0.073489	0.021317	0.057926	1e-05	0.021745	0.825513	0.073489	0.021317	0.057926	1e-05	0.021745
L. graecus	3322	Macedonia	Debreste	41.502	21.293	0.99992	1e-05	1e-05	1e-05	1e-05	1e-05	1e-05	1e-05	1e-05	0.99992	1e-05	1e-05	1e-05	1e-05	4e-05	0.99992	1e-05	1e-05	1e-05	1e-05	4e-05
L. graecus	3812	Macedonia	Drugovo	41.4131	20.8151	0.99992	1e-05	1e-05	1e-05	1e-05	1e-05	1e-05	1e-05	1e-05	0.99992	1e-05	1e-05	1e-05	1e-05	4e-05	0.99992	1e-05	1e-05	1e-05	1e-05	4e-05
L. graecus	3435	Macedonia	Garnikovo1	41.277	22.06	0.898849	1e-05	1e-05	0.101071	1.2e-05	1e-05	1e-05	1.8e-05	1e-05	0.898849	1e-05	1e-05	0.101071	1.2e-05	4.8e-05	0.898849	1e-05	1e-05	0.101071	1.2e-05	4.8e-05
L. graecus	3297	Macedonia	Gorno Srpci	41.072	21.219	0.99992	1e-05	1e-05	1e-05	1e-05	1e-05	1e-05	1e-05	1e-05	0.99992	1e-05	1e-05	1e-05	1e-05	4e-05	0.99992	1e-05	1e-05	1e-05	1e-05	4e-05
L. graecus	3340	Macedonia	Gostivar	41.817	20.899	0.999917	1e-05	1.3e-05	1e-05	1e-05	1e-05	1e-05	1e-05	1e-05	0.999917	1e-05	1.3e-05	1e-05	1e-05	4e-05	0.999917	1e-05	1.3e-05	1e-05	1e-05	4e-05
L. graecus	3319	Macedonia	Izvor	41.521	21.71	0.87621	1e-05	1e-05	0.12372	1e-05	1e-05	1e-05	1e-05	1e-05	0.87621	1e-05	1e-05	0.12372	1e-05	4e-05	0.87621	1e-05	1e-05	0.12372	1e-05	4e-05
L. graecus	3834	Macedonia	Kolibari	41.58	20.951	0.999919	1e-05	1e-05	1e-05	1e-05	1e-05	1.1e-05	1e-05	1e-05	0.999919	1e-05	1e-05	1e-05	1e-05	4.1e-05	0.999919	1e-05	1e-05	1e-05	1e-05	4.1e-05
L. graecus	3296	Macedonia	Lera	41.101	21.168	0.99992	1e-05	1e-05	1e-05	1e-05	1e-05	1e-05	1e-05	1e-05	0.99992	1e-05	1e-05	1e-05	1e-05	4e-05	0.99992	1e-05	1e-05	1e-05	1e-05	4e-05
L. graecus	3289	Macedonia	Leskoec	40.962	20.885	0.999917	1e-05	1e-05	1e-05	1e-05	1.2e-05	1e-05	1e-05	1e-05	0.999917	1e-05	1e-05	1e-05	1e-05	4.2e-05	0.999917	1e-05	1e-05	1e-05	1e-05	4.2e-05
L. graecus	3298	Macedonia	Loznani	41.221	21.446	0.99992	1e-05	1e-05	1e-05	1e-05	1e-05	1e-05	1e-05	1e-05	0.99992	1e-05	1e-05	1e-05	1e-05	4e-05	0.99992	1e-05	1e-05	1e-05	1e-05	4e-05
L. graecus	3300	Macedonia	R’zanicino	41.914	21.643	0.842596	1e-05	1e-05	1e-05	1e-05	1e-05	1e-05	1e-05	0.157334	0.842596	1e-05	1e-05	1e-05	1e-05	0.157364	0.842596	1e-05	1e-05	1e-05	1e-05	0.157364
L. graecus	10460	Macedonia	Skoplje	41.997	21.428	0.927288	1e-05	1e-05	1e-05	1e-05	1e-05	1e-05	1e-05	0.072642	0.927288	1e-05	1e-05	1e-05	1e-05	0.072672	0.927288	1e-05	1e-05	1e-05	1e-05	0.072672
L. graecus	3868	Macedonia	Suvodol	41.5063	21.2742	0.973711	1e-05	1e-05	0.026219	1e-05	1e-05	1e-05	1e-05	1e-05	0.973711	1e-05	1e-05	0.026219	1e-05	4e-05	0.973711	1e-05	1e-05	0.026219	1e-05	4e-05
L. graecus	10428	Montenegro	Bijele Poljane	42.607	18.885	0.86989	1e-05	1e-05	0.13004	1e-05	1e-05	1e-05	1e-05	1e-05	0.86989	1e-05	1e-05	0.13004	1e-05	4e-05	0.86989	1e-05	1e-05	0.13004	1e-05	4e-05
L. graecus	3426	Montenegro	Bjeloši1	42.368	18.888	0.99992	1e-05	1e-05	1e-05	1e-05	1e-05	1e-05	1e-05	1e-05	0.99992	1e-05	1e-05	1e-05	1e-05	4e-05	0.995563	1e-05	1e-05	0.00436733	1e-05	4e-05
L. graecus	3205	Montenegro	Bjeloši2	42.374	18.907	0.99992	1e-05	1e-05	1e-05	1e-05	1e-05	1e-05	1e-05	1e-05	0.99992	1e-05	1e-05	1e-05	1e-05	4e-05
L. graecus	10233	Montenegro	Bjeloši2	42.374	18.907	0.986848	1e-05	1e-05	0.013082	1e-05	1e-05	1e-05	1e-05	1e-05	0.986848	1e-05	1e-05	0.013082	1e-05	4e-05
L. graecus	10368	Montenegro	Bojanje Brdo	42.563	18.822	0.99992	1e-05	1e-05	1e-05	1e-05	1e-05	1e-05	1e-05	1e-05	0.99992	1e-05	1e-05	1e-05	1e-05	4e-05	0.99992	1e-05	1e-05	1e-05	1e-05	4e-05
L. graecus	10236	Montenegro	Ceklin-Pijavica	42.3671	18.9819	0.994871	1e-05	1e-05	1e-05	1.5e-05	1e-05	1e-05	1e-05	0.005054	0.994871	1e-05	1e-05	1e-05	1.5e-05	0.005084	0.994871	1e-05	1e-05	1e-05	1.5e-05	0.005084
L. graecus	10290	Montenegro	Cerova-Lokva	42.7274	18.5768	0.99992	1e-05	1e-05	1e-05	1e-05	1e-05	1e-05	1e-05	1e-05	0.99992	1e-05	1e-05	1e-05	1e-05	4e-05	0.99992	1e-05	1e-05	1e-05	1e-05	4e-05
L. graecus	10386	Montenegro	Čevo	42.545	18.916	0.998562	1e-05	1e-05	0.001368	1e-05	1e-05	1e-05	1e-05	1e-05	0.998562	1e-05	1e-05	0.001368	1e-05	4e-05	0.998562	1e-05	1e-05	0.001368	1e-05	4e-05
L. graecus	10238	Montenegro	Drazevina	42.4302	19.1454	0.999914	1e-05	1e-05	1e-05	1e-05	1e-05	1.6e-05	1e-05	1e-05	0.999914	1e-05	1e-05	1e-05	1e-05	4.6e-05	0.999914	1e-05	1e-05	1e-05	1e-05	4.6e-05
L. graecus	10338	Montenegro	Erakovice	42.531	19.044	0.999379	1e-05	1e-05	1e-05	1e-05	1e-05	1e-05	1e-05	0.000551	0.999379	1e-05	1e-05	1e-05	1e-05	0.000581	0.999379	1e-05	1e-05	1e-05	1e-05	0.000581
L. graecus	10402	Montenegro	Gornja Trepča	42.829	18.767	0.984202	1e-05	1e-05	0.015728	1e-05	1e-05	1e-05	1e-05	1e-05	0.984202	1e-05	1e-05	0.015728	1e-05	4e-05	0.984202	1e-05	1e-05	0.015728	1e-05	4e-05
L. graecus	10230	Montenegro	Jabuke-Kamenica	42.6914	18.7115	0.989826	1e-05	1e-05	0.010104	1e-05	1e-05	1e-05	1e-05	1e-05	0.989826	1e-05	1e-05	0.010104	1e-05	4e-05	0.989826	1e-05	1e-05	0.010104	1e-05	4e-05
L. graecus	10397	Montenegro	Kosić	42.523	19.154	0.925545	1e-05	1e-05	0.074382	1e-05	1.3e-05	1e-05	1e-05	1e-05	0.925545	1e-05	1e-05	0.074382	1e-05	4.3e-05	0.925545	1e-05	1e-05	0.074382	1e-05	4.3e-05
L. graecus	4712	Montenegro	Kostanjica	42.0888	19.2632	0.963725	1e-05	1e-05	0.015367	1e-05	0.018261	0.001372	1e-05	0.001235	0.963725	1e-05	1e-05	0.015367	1e-05	0.020878	0.963725	1e-05	1e-05	0.015367	1e-05	0.020878
L. graecus	10227	Montenegro	Kovacevka-Lokva	42.7271	18.6119	0.999913	1.4e-05	1e-05	1e-05	1e-05	1.3e-05	1e-05	1e-05	1e-05	0.999913	1.4e-05	1e-05	1e-05	1e-05	4.3e-05	0.999913	1.4e-05	1e-05	1e-05	1e-05	4.3e-05
L. graecus	10315	Montenegro	Milojevići	42.635	18.995	0.99992	1e-05	1e-05	1e-05	1e-05	1e-05	1e-05	1e-05	1e-05	0.99992	1e-05	1e-05	1e-05	1e-05	4e-05	0.99992	1e-05	1e-05	1e-05	1e-05	4e-05
L. graecus	10354	Montenegro	Orahovo	42.243	19.062	0.912064	1e-05	1e-05	0.082924	1e-05	0.004951	1.1e-05	1e-05	1e-05	0.912064	1e-05	1e-05	0.082924	1e-05	0.004982	0.912064	1e-05	1e-05	0.082924	1e-05	0.004982
L. graecus	10413	Montenegro	Pilatovci	42.856	18.518	0.987384	1e-05	0.012546	1e-05	1e-05	1e-05	1e-05	1e-05	1e-05	0.987384	1e-05	0.012546	1e-05	1e-05	4e-05	0.987384	1e-05	0.012546	1e-05	1e-05	4e-05
L. graecus	10244	Montenegro	Rakoce-Meka-Lokva	42.6681	18.7462	0.999918	1e-05	1e-05	1.2e-05	1e-05	1e-05	1e-05	1e-05	1e-05	0.999918	1e-05	1e-05	1.2e-05	1e-05	4e-05	0.999918	1e-05	1e-05	1.2e-05	1e-05	4e-05
L. graecus	10480	Montenegro	Razvuđska Kamenica	42.692	18.723	0.99992	1e-05	1e-05	1e-05	1e-05	1e-05	1e-05	1e-05	1e-05	0.99992	1e-05	1e-05	1e-05	1e-05	4e-05	0.99992	1e-05	1e-05	1e-05	1e-05	4e-05
L. graecus	10308	Montenegro	Rudnjača	42.832	18.621	0.965603	1e-05	1e-05	0.034327	1e-05	1e-05	1e-05	1e-05	1e-05	0.965603	1e-05	1e-05	0.034327	1e-05	4e-05	0.965603	1e-05	1e-05	0.034327	1e-05	4e-05
L. graecus	4760	Montenegro	Tivat	42.3966	18.7389	0.999914	1e-05	1e-05	1e-05	1e-05	1.6e-05	1e-05	1e-05	1e-05	0.999914	1e-05	1e-05	1e-05	1e-05	4.6e-05	0.999914	1e-05	1e-05	1e-05	1e-05	4.6e-05
L. graecus	4190	Montenegro	Ulcinj	41.9276	19.2334	0.990446	1e-05	1e-05	1e-05	1e-05	0.009484	1e-05	1e-05	1e-05	0.990446	1e-05	1e-05	1e-05	1e-05	0.009514	0.990446	1e-05	1e-05	1e-05	1e-05	0.009514
L. graecus	10390	Montenegro	Vojova Kamenica	42.455	19.143	0.983964	1e-05	1e-05	0.015959	1e-05	1e-05	1.7e-05	1e-05	1e-05	0.983964	1e-05	1e-05	0.015959	1e-05	4.7e-05	0.983964	1e-05	1e-05	0.015959	1e-05	4.7e-05
L. kosswigi	4975	Turkey	Alemdar/İstanbul	41.0229	29.2717	1e-05	0.99992	1e-05	1e-05	1e-05	1e-05	1e-05	1e-05	1e-05	1e-05	0.99992	1e-05	1e-05	1e-05	4e-05	1e-05	0.979969	1e-05	0.0199607	1e-05	4e-05
L. kosswigi	4976	Turkey	Alemdar/İstanbul	41.0229	29.2717	1e-05	0.99992	1e-05	1e-05	1e-05	1e-05	1e-05	1e-05	1e-05	1e-05	0.99992	1e-05	1e-05	1e-05	4e-05
L. kosswigi	4982	Turkey	Alemdar/İstanbul	41.0229	29.2717	1e-05	0.940068	1e-05	0.059862	1e-05	1e-05	1e-05	1e-05	1e-05	1e-05	0.940068	1e-05	0.059862	1e-05	4e-05
L. kosswigi	6331	Turkey	Alibahadir/Beykoz	41.1839	29.2047	1e-05	0.99992	1e-05	1e-05	1e-05	1e-05	1e-05	1e-05	1e-05	1e-05	0.99992	1e-05	1e-05	1e-05	4e-05	1e-05	0.99992	1e-05	1e-05	1e-05	4e-05
L. kosswigi	6332	Turkey	Alibahadir/Beykoz	41.1839	29.2047	1e-05	0.99992	1e-05	1e-05	1e-05	1e-05	1e-05	1e-05	1e-05	1e-05	0.99992	1e-05	1e-05	1e-05	4e-05
L. kosswigi	6329	Turkey	Alibahadir/Beykoz	41.1839	29.2047	1e-05	0.99992	1e-05	1e-05	1e-05	1e-05	1e-05	1e-05	1e-05	1e-05	0.99992	1e-05	1e-05	1e-05	4e-05
L. kosswigi	4936	Turkey	Demirbey/Sakarya	40.8502	30.4914	1e-05	0.99992	1e-05	1e-05	1e-05	1e-05	1e-05	1e-05	1e-05	1e-05	0.99992	1e-05	1e-05	1e-05	4e-05	1e-05	0.99992	1e-05	1e-05	1e-05	4e-05
L. kosswigi	4935	Turkey	Demirbey/Sakarya	40.8502	30.4914	1e-05	0.99992	1e-05	1e-05	1e-05	1e-05	1e-05	1e-05	1e-05	1e-05	0.99992	1e-05	1e-05	1e-05	4e-05
L. kosswigi	4943	Turkey	Demirbey/Sakarya	40.8502	30.4914	1e-05	0.99992	1e-05	1e-05	1e-05	1e-05	1e-05	1e-05	1e-05	1e-05	0.99992	1e-05	1e-05	1e-05	4e-05
L. kosswigi	4971	Turkey	Denizli1/Gebze	40.8976	29.5555	1e-05	0.954277	1e-05	0.045652	1e-05	1e-05	1e-05	1e-05	1e-05	1e-05	0.954277	1e-05	0.045652	1e-05	4e-05	1e-05	0.954277	1e-05	0.045652	1e-05	4e-05
L. kosswigi	6370	Turkey	Denizli2/Gebze	40.8932	29.5642	1e-05	0.99992	1e-05	1e-05	1e-05	1e-05	1e-05	1e-05	1e-05	1e-05	0.99992	1e-05	1e-05	1e-05	4e-05	1e-05	0.99992	1e-05	1e-05	1e-05	4e-05
L. kosswigi	6458	Turkey	Hacılar1/Çaycuma	41.4986	32.0899	1e-05	0.99992	1e-05	1e-05	1e-05	1e-05	1e-05	1e-05	1e-05	1e-05	0.99992	1e-05	1e-05	1e-05	4e-05	1e-05	0.999919	1e-05	1e-05	1e-05	4.06667e-05
L. kosswigi	6459	Turkey	Hacılar1/Çaycuma	41.4986	32.0899	1e-05	0.99992	1e-05	1e-05	1e-05	1e-05	1e-05	1e-05	1e-05	1e-05	0.99992	1e-05	1e-05	1e-05	4e-05
L. kosswigi	6460	Turkey	Hacılar1/Çaycuma	41.4986	32.0899	1e-05	0.999918	1e-05	1e-05	1e-05	1e-05	1.2e-05	1e-05	1e-05	1e-05	0.999918	1e-05	1e-05	1e-05	4.2e-05
L. kosswigi	7913	Turkey	Hacılar2/Çaycuma	41.495	32.0886	1e-05	0.999919	1e-05	1e-05	1e-05	1e-05	1e-05	1e-05	1e-05	1e-05	0.999919	1e-05	1e-05	1e-05	4e-05	1e-05	0.999919	1e-05	1e-05	1e-05	4e-05
L. kosswigi	6168	Turkey	Ihsaniye/Sakarya	41.1188	30.6468	1e-05	0.99992	1e-05	1e-05	1e-05	1e-05	1e-05	1e-05	1e-05	1e-05	0.99992	1e-05	1e-05	1e-05	4e-05	1e-05	0.99992	1e-05	1e-05	1e-05	4e-05
L. kosswigi	4960	Turkey	Karasu/Sakarya	41.0827	30.7623	1e-05	0.99992	1e-05	1e-05	1e-05	1e-05	1e-05	1e-05	1e-05	1e-05	0.99992	1e-05	1e-05	1e-05	4e-05	1e-05	0.99992	1e-05	1e-05	1e-05	4e-05
L. kosswigi	4956	Turkey	Karasu/Sakarya	41.0827	30.7623	1e-05	0.99992	1e-05	1e-05	1e-05	1e-05	1e-05	1e-05	1e-05	1e-05	0.99992	1e-05	1e-05	1e-05	4e-05
L. kosswigi	4957	Turkey	Karasu/Sakarya	41.0827	30.7623	1e-05	0.99992	1e-05	1e-05	1e-05	1e-05	1e-05	1e-05	1e-05	1e-05	0.99992	1e-05	1e-05	1e-05	4e-05
L. kosswigi	6456	Turkey	Kuyumculu/Sakarya	41.0574	30.7886	1e-05	0.999916	1.1e-05	1.2e-05	1e-05	1e-05	1e-05	1e-05	1e-05	1e-05	0.999916	1.1e-05	1.2e-05	1e-05	4e-05	1e-05	0.999916	1.1e-05	1.2e-05	1e-05	4e-05
L. kosswigi	4964	Turkey	Mollafeneri1/Gebze	40.8944	29.507	1e-05	0.99992	1e-05	1e-05	1e-05	1e-05	1e-05	1e-05	1e-05	1e-05	0.99992	1e-05	1e-05	1e-05	4e-05	1e-05	0.99992	1e-05	1e-05	1e-05	4e-05
L. kosswigi	4966	Turkey	Mollafeneri1/Gebze	40.8944	29.507	1e-05	0.99992	1e-05	1e-05	1e-05	1e-05	1e-05	1e-05	1e-05	1e-05	0.99992	1e-05	1e-05	1e-05	4e-05
L. kosswigi	6345	Turkey	Mollafeneri2/Gebze	40.8931	29.5076	1e-05	0.99992	1e-05	1e-05	1e-05	1e-05	1e-05	1e-05	1e-05	1e-05	0.99992	1e-05	1e-05	1e-05	4e-05	1e-05	0.99992	1e-05	1e-05	1e-05	4e-05
L. kosswigi	5045	Turkey	Yalnizçam/Ereğli	41.3333	31.65	1e-05	0.950105	1e-05	0.049825	1e-05	1e-05	1e-05	1e-05	1e-05	1e-05	0.950105	1e-05	0.049825	1e-05	4e-05	1e-05	0.950105	1e-05	0.049825	1e-05	4e-05
L. lantzi	6296	Georgia	Bakuriani2	41.7505	43.5167	1e-05	1e-05	0.999911	1e-05	1.6e-05	1e-05	1e-05	1.2e-05	1e-05	1e-05	1e-05	0.999911	1e-05	1.6e-05	4.2e-05	1e-05	1e-05	0.999911	1e-05	1.6e-05	4.2e-05
L. lantzi	6302	Georgia	Dabadzveli Lake	41.764	43.356	1e-05	1e-05	0.99991	1e-05	1e-05	1.7e-05	1e-05	1.2e-05	1e-05	1e-05	1e-05	0.99991	1e-05	1e-05	4.9e-05	1e-05	1e-05	0.99991	1e-05	1e-05	4.9e-05
L. lantzi	6321	Georgia	Senaki	42.178	42.0714	1e-05	1e-05	0.999907	1e-05	1.3e-05	2e-05	1e-05	1e-05	1e-05	1e-05	1e-05	0.999907	1e-05	1.3e-05	5e-05	1e-05	1e-05	0.999907	1e-05	1.3e-05	5e-05
L. lantzi	6328	Georgia	Tetri_Tsklebi	41.8704	45.2581	1e-05	1e-05	0.999917	1e-05	1e-05	1e-05	1e-05	1.3e-05	1e-05	1e-05	1e-05	0.999917	1e-05	1e-05	4.3e-05	1e-05	1e-05	0.999917	1e-05	1e-05	4.3e-05
L. lantzi	5278	Russia	Dylym	43.0667	46.6167	1e-05	1e-05	0.851486	0.088826	1e-05	0.059628	1e-05	1e-05	1e-05	1e-05	1e-05	0.851486	0.088826	1e-05	0.059658	1e-05	1e-05	0.851486	0.088826	1e-05	0.059658
L. lantzi	5286	Russia	Goryachiy Kluch	44.65	39.1333	1e-05	1e-05	0.999916	1e-05	1e-05	1e-05	1.4e-05	1e-05	1e-05	1e-05	1e-05	0.999916	1e-05	1e-05	4.4e-05	1e-05	1e-05	0.999916	1e-05	1e-05	4.4e-05
L. lantzi	5266	Russia	Krepostnaya	44.7	38.666	1e-05	1e-05	0.99992	1e-05	1e-05	1e-05	1e-05	1e-05	1e-05	1e-05	1e-05	0.99992	1e-05	1e-05	4e-05	1e-05	1e-05	0.99992	1e-05	1e-05	4e-05
L. lantzi	5304	Russia	Lidzava	43.1833	40.35	1e-05	1e-05	0.99992	1e-05	1e-05	1e-05	1e-05	1e-05	1e-05	1e-05	1e-05	0.99992	1e-05	1e-05	4e-05	1e-05	1e-05	0.99992	1e-05	1e-05	4e-05
L. lantzi	6315	Russia	Loo	43.6667	39.6333	1e-05	1e-05	0.999917	1e-05	1.3e-05	1e-05	1e-05	1e-05	1e-05	1e-05	1e-05	0.999917	1e-05	1.3e-05	4e-05	1e-05	1e-05	0.999917	1e-05	1.3e-05	4e-05
L. lantzi	5324	Russia	Machara	42.9344	41.0879	1e-05	1e-05	0.99992	1e-05	1e-05	1e-05	1e-05	1e-05	1e-05	1e-05	1e-05	0.99992	1e-05	1e-05	4e-05	1e-05	1e-05	0.99992	1e-05	1e-05	4e-05
L. lantzi	5269	Russia	Maikop	44.6	40.1	1e-05	1e-05	0.999907	1.1e-05	1.3e-05	1.6e-05	1e-05	1.3e-05	1e-05	1e-05	1e-05	0.999907	1.1e-05	1.3e-05	4.9e-05	1e-05	1e-05	0.999907	1.1e-05	1.3e-05	4.9e-05
L. lantzi	5275	Russia	Malaya Ritsa Lake	43.4667	40.5	1e-05	1e-05	0.99992	1e-05	1e-05	1e-05	1e-05	1e-05	1e-05	1e-05	1e-05	0.99992	1e-05	1e-05	4e-05	1e-05	1.16667e-05	0.999916	1e-05	1e-05	4.16667e-05
L. lantzi	5310	Russia	Malaya Ritsa Lake	43.4667	40.5	1e-05	1e-05	0.99992	1e-05	1e-05	1e-05	1e-05	1e-05	1e-05	1e-05	1e-05	0.99992	1e-05	1e-05	4e-05
L. lantzi	5311	Russia	Malaya Ritsa Lake	43.4667	40.5	1e-05	1.5e-05	0.999909	1e-05	1e-05	1e-05	1e-05	1.5e-05	1e-05	1e-05	1.5e-05	0.999909	1e-05	1e-05	4.5e-05
L. lantzi	5292	Russia	Mineralnye Vody	44.2	43.0833	1e-05	1e-05	0.99992	1e-05	1e-05	1e-05	1e-05	1e-05	1e-05	1e-05	1e-05	0.99992	1e-05	1e-05	4e-05	1e-05	1e-05	0.99992	1e-05	1e-05	4e-05
L. lantzi	5299	Russia	Sukhoy Liman Lake	44.75	37.45	1e-05	1e-05	0.99992	1e-05	1e-05	1e-05	1e-05	1e-05	1e-05	1e-05	1e-05	0.99992	1e-05	1e-05	4e-05	1e-05	1e-05	0.99992	1e-05	1e-05	4e-05
L. montandoni	1822	Czech Republic	Jeseniki	50.0715	17.3072	1e-05	1e-05	0.007493	0.962356	0.009022	1e-05	0.021079	1e-05	1e-05	1e-05	1e-05	0.007493	0.962356	0.009022	0.021109	1e-05	1e-05	0.007493	0.962356	0.009022	0.021109
L. montandoni	1214	Poland	Krempna	49.4736	21.4752	1e-05	1e-05	1e-05	0.99992	1e-05	1e-05	1e-05	1e-05	1e-05	1e-05	1e-05	1e-05	0.99992	1e-05	4e-05	1e-05	1e-05	1e-05	0.99992	1e-05	4e-05
L. montandoni	1840	Poland	Smerek	49.1624	22.436	1e-05	1e-05	1e-05	0.99992	1e-05	1e-05	1e-05	1e-05	1e-05	1e-05	1e-05	1e-05	0.99992	1e-05	4e-05	1e-05	1e-05	1e-05	0.99992	1e-05	4e-05
L. montandoni	2447	Romania	Cuejdiu	46.9954	26.2742	1e-05	1e-05	1e-05	0.99992	1e-05	1e-05	1e-05	1e-05	1e-05	1e-05	1e-05	1e-05	0.99992	1e-05	4e-05	1e-05	1e-05	1e-05	0.99992	1e-05	4e-05
L. montandoni	1622	Romania	Lacu Roşu	46.7772	25.7709	1e-05	1e-05	1e-05	0.999919	1e-05	1e-05	1e-05	1.1e-05	1e-05	1e-05	1e-05	1e-05	0.999919	1e-05	4.1e-05	1e-05	1e-05	1e-05	0.999919	1e-05	4.1e-05
L. montandoni	2267	Romania	Lunca Ilvei	47.3308	24.9746	1e-05	1e-05	1e-05	0.999917	1e-05	1e-05	1e-05	1.3e-05	1e-05	1e-05	1e-05	1e-05	0.999917	1e-05	4.3e-05	1e-05	1e-05	1e-05	0.999917	1e-05	4.3e-05
L. montandoni	1339	Romania	Pasul Gutai	47.7	23.78	1e-05	1e-05	1e-05	0.99992	1e-05	1e-05	1e-05	1e-05	1e-05	1e-05	1e-05	1e-05	0.99992	1e-05	4e-05	1e-05	1e-05	1e-05	0.99992	1e-05	4e-05
L. montandoni	1396	Romania	Pasul Musat1	45.9633	26.3969	1e-05	1e-05	1e-05	0.99992	1e-05	1e-05	1e-05	1e-05	1e-05	1e-05	1e-05	1e-05	0.99992	1e-05	4e-05	1e-05	1e-05	1e-05	0.99992	1e-05	4e-05
L. montandoni	1501	Romania	Predeal	45.4895	25.5587	1e-05	1e-05	1e-05	0.963747	1e-05	0.036183	1e-05	1e-05	1e-05	1e-05	1e-05	1e-05	0.963747	1e-05	0.036213	1e-05	1e-05	1e-05	0.963747	1e-05	0.036213
L. montandoni	2050	Romania	Săcele	45.5452	25.8192	1e-05	1e-05	1e-05	0.999918	1.2e-05	1e-05	1e-05	1e-05	1e-05	1e-05	1e-05	1e-05	0.999918	1.2e-05	4e-05	1e-05	1e-05	1e-05	0.999918	1.2e-05	4e-05
L. montandoni	1957	Romania	Sântimbru	46.3004	25.7704	1e-05	1e-05	1e-05	0.946755	1.1e-05	0.053174	1e-05	1e-05	1e-05	1e-05	1e-05	1e-05	0.946755	1.1e-05	0.053204	1e-05	1e-05	1e-05	0.946755	1.1e-05	0.053204
L. montandoni	1434	Romania	Voina	45.4394	25.0464	1e-05	1e-05	1e-05	0.925935	0.033019	1e-05	1e-05	0.040987	1e-05	1e-05	1e-05	1e-05	0.925935	0.033019	0.041017	1e-05	1e-05	1e-05	0.925935	0.033019	0.041017
L. montandoni	2985	Slovakia	Sihelne	49.5107	19.3866	1e-05	1e-05	1e-05	0.99992	1e-05	1e-05	1e-05	1e-05	1e-05	1e-05	1e-05	1e-05	0.99992	1e-05	4e-05	1e-05	1e-05	1e-05	0.99992	1e-05	4e-05
L. montandoni	1286	Ukraine	Dzembronia	48.07	24.62	1e-05	1e-05	1e-05	0.999913	1e-05	1e-05	1e-05	1.7e-05	1e-05	1e-05	1e-05	1e-05	0.999913	1e-05	4.7e-05	1e-05	1e-05	1e-05	0.999913	1e-05	4.7e-05
L. montandoni	2888	Ukraine	Rakovets	49.6349	24.0396	1e-05	1e-05	1e-05	0.99992	1e-05	1e-05	1e-05	1e-05	1e-05	1e-05	1e-05	1e-05	0.99992	1e-05	4e-05	1e-05	1e-05	1e-05	0.99992	1e-05	4e-05
L. montandoni	2936	Ukraine	Vuchkove	48.4384	23.5672	1e-05	1e-05	1e-05	0.99992	1e-05	1e-05	1e-05	1e-05	1e-05	1e-05	1e-05	1e-05	0.99992	1e-05	4e-05	1e-05	1e-05	1e-05	0.99992	1e-05	4e-05
L. schmidtleri	475	Bulgaria	Aleksandrovo	42.6019	25.0994	1e-05	1e-05	1e-05	1e-05	0.967786	1e-05	1e-05	1e-05	0.032144	1e-05	1e-05	1e-05	1e-05	0.967786	0.032174	1e-05	1e-05	1e-05	1e-05	0.967786	0.032174
L. schmidtleri	10693	Bulgaria	Dositeevo	41.917	26.0215	1e-05	1e-05	0.011	1e-05	0.98893	1e-05	1e-05	1e-05	1e-05	1e-05	1e-05	0.011	1e-05	0.98893	4e-05	1e-05	1e-05	0.011	1e-05	0.98893	4e-05
L. schmidtleri	10720	Bulgaria	Kraymorie	42.4455	27.4713	1.4e-05	1e-05	0.047865	1e-05	0.91935	1e-05	1e-05	0.032721	1e-05	1.4e-05	1e-05	0.047865	1e-05	0.91935	0.032751	1.4e-05	1e-05	0.047865	1e-05	0.91935	0.032751
L. schmidtleri	5497	Bulgaria	Lozenets	42.206	27.802	1e-05	0.013197	0.023491	1e-05	0.925941	1e-05	1e-05	0.03732	1e-05	1e-05	0.013197	0.023491	1e-05	0.925941	0.03735	1e-05	0.013197	0.023491	1e-05	0.925941	0.03735
L. schmidtleri	3671	Bulgaria	Ostar Kamak	41.879	25.853	1e-05	1e-05	0.021413	1e-05	0.978512	1e-05	1.1e-05	1.4e-05	1e-05	1e-05	1e-05	0.021413	1e-05	0.978512	4.5e-05	1e-05	0.000407	0.0107115	1e-05	0.958118	0.0307435
L. schmidtleri	3673	Bulgaria	Ostar Kamak	41.879	25.853	1e-05	0.000804	1e-05	1e-05	0.937724	0.061412	1e-05	1e-05	1e-05	1e-05	0.000804	1e-05	1e-05	0.937724	0.061442
L. schmidtleri	5520	Bulgaria	Ostar Kamak2	41.881	25.85	1e-05	1e-05	1e-05	1e-05	0.997758	0.002166	1e-05	1.5e-05	1e-05	1e-05	1e-05	1e-05	1e-05	0.997758	0.002201	1e-05	1e-05	1e-05	1e-05	0.997758	0.002201
L. schmidtleri	10715	Bulgaria	Radovets	41.9539	26.527	1e-05	1e-05	1e-05	1e-05	0.984153	0.008281	0.002787	0.004729	1e-05	1e-05	1e-05	1e-05	1e-05	0.984153	0.015807	1e-05	1e-05	1e-05	1e-05	0.984153	0.015807
L. schmidtleri	10702	Bulgaria	Shishmantsi	42.244	25.0095	1e-05	1e-05	1e-05	1e-05	0.976043	1e-05	1e-05	0.023887	1e-05	1e-05	1e-05	1e-05	1e-05	0.976043	0.023917	1e-05	1e-05	1e-05	1e-05	0.976043	0.023917
L. schmidtleri	5543	Bulgaria	Tulovo	42.562	25.546	0.007211	1e-05	1e-05	0.006724	0.905188	1e-05	1.8e-05	0.075415	0.005414	0.007211	1e-05	1e-05	0.006724	0.905188	0.080857	0.007211	1e-05	1e-05	0.006724	0.905188	0.080857
L. schmidtleri	5491	Bulgaria	Yasna Polyana	42.27	27.596	1e-05	0.01683	0.011084	1e-05	0.941361	1e-05	1e-05	0.030675	1e-05	1e-05	0.01683	0.011084	1e-05	0.941361	0.030705	1e-05	0.01683	0.011084	1e-05	0.941361	0.030705
L. schmidtleri	5261	Greece	Aghios Kosmas	41.0839	24.6707	0.054317	1e-05	1e-05	1e-05	0.876754	0.050855	1e-05	0.016458	0.001575	0.054317	1e-05	1e-05	1e-05	0.876754	0.068898	0.054317	1e-05	1e-05	1e-05	0.876754	0.068898
L. schmidtleri	5254	Greece	Evros-Feres	40.8588	26.1838	1e-05	1e-05	0.007054	1e-05	0.979919	1e-05	0.012968	1e-05	1e-05	1e-05	1e-05	0.007054	1e-05	0.979919	0.012998	1e-05	1e-05	0.007054	1e-05	0.979919	0.012998
L. schmidtleri	5255	Greece	Evros-Lira	41.0748	26.2659	1e-05	0.014249	1.6e-05	1e-05	0.985674	1e-05	1e-05	1e-05	1e-05	1e-05	0.014249	1.6e-05	1e-05	0.985674	4e-05	1e-05	0.014249	1.6e-05	1e-05	0.985674	4e-05
L. schmidtleri	11856	Greece	Gravouna	41.008	24.678	0.050701	1e-05	0.031562	1e-05	0.869647	1e-05	1e-05	1e-05	0.048039	0.050701	1e-05	0.031562	1e-05	0.869647	0.048069	0.050701	1e-05	0.031562	1e-05	0.869647	0.048069
L. schmidtleri	10812	Greece	Lefkimmi2	41.0985	26.1023	1e-05	1e-05	1.2e-05	1e-05	0.971923	0.028005	1e-05	1e-05	1e-05	1e-05	1e-05	1.2e-05	1e-05	0.971923	0.028035	1e-05	1e-05	1.2e-05	1e-05	0.971923	0.028035
L. schmidtleri	10813	Greece	Lefkimmi3	41.1204	26.1476	1e-05	1e-05	0.009333	1e-05	0.95813	0.008231	1e-05	0.024257	1e-05	1e-05	1e-05	0.009333	1e-05	0.95813	0.032508	1e-05	1e-05	0.009333	1e-05	0.95813	0.032508
L. schmidtleri	10811	Greece	Monastiraki	40.8479	26.1224	1e-05	1.7e-05	1e-05	1e-05	0.999913	1e-05	1e-05	1e-05	1e-05	1e-05	1.7e-05	1e-05	1e-05	0.999913	4e-05	1e-05	1.7e-05	1e-05	1e-05	0.999913	4e-05
L. schmidtleri	10808	Greece	Nipsa	40.9379	26.0562	1e-05	1e-05	0.010886	1e-05	0.989038	1e-05	1e-05	1.6e-05	1e-05	1e-05	1e-05	0.010886	1e-05	0.989038	4.6e-05	1e-05	1e-05	0.010886	1e-05	0.989038	4.6e-05
L. schmidtleri	10198	Turkey	Akköy/Çanakkale	39.806	27.183	1e-05	1e-05	1e-05	1e-05	0.99992	1e-05	1e-05	1e-05	1e-05	1e-05	1e-05	1e-05	1e-05	0.99992	4e-05	1e-05	1e-05	1e-05	1e-05	0.99992	4e-05
L. schmidtleri	4864	Turkey	Derbentbasi/Ezine	39.9415	26.2958	1e-05	1e-05	1e-05	1e-05	0.99992	1e-05	1e-05	1e-05	1e-05	1e-05	1e-05	1e-05	1e-05	0.99992	4e-05	1e-05	1e-05	1.26667e-05	1e-05	0.995938	0.00401933
L. schmidtleri	4865	Turkey	Derbentbasi/Ezine	39.9415	26.2958	1e-05	1e-05	1.8e-05	1e-05	0.999905	1e-05	1e-05	1.7e-05	1e-05	1e-05	1e-05	1.8e-05	1e-05	0.999905	4.7e-05
L. schmidtleri	4854	Turkey	Derbentbasi/Ezine	39.9415	26.2958	1e-05	1e-05	1e-05	1e-05	0.987989	1e-05	1e-05	0.011941	1e-05	1e-05	1e-05	1e-05	1e-05	0.987989	0.011971
L. schmidtleri	7831	Turkey	Dursunköy/İstanbul	41.2075	28.6416	1e-05	0.040904	0.005967	1e-05	0.920102	0.017869	1e-05	0.015118	1e-05	1e-05	0.040904	0.005967	1e-05	0.920102	0.033007	1.2e-05	0.0377603	0.0322543	0.00383333	0.896534	0.0296063
L. schmidtleri	7830	Turkey	Dursunköy/İstanbul	41.2075	28.6416	1.6e-05	0.036389	0.039281	1e-05	0.909139	1e-05	1.1e-05	0.015134	1e-05	1.6e-05	0.036389	0.039281	1e-05	0.909139	0.015165
L. schmidtleri	7821	Turkey	Dursunköy/İstanbul	41.2075	28.6416	1e-05	0.035988	0.051515	0.01148	0.86036	0.010963	1e-05	0.029664	1e-05	1e-05	0.035988	0.051515	0.01148	0.86036	0.040647
L. schmidtleri	4809	Turkey	Egrigol/Bergama	39.0239	27.1108	1e-05	1e-05	1e-05	1e-05	0.99992	1e-05	1e-05	1e-05	1e-05	1e-05	1e-05	1e-05	1e-05	0.99992	4e-05	1e-05	1e-05	1e-05	1.03333e-05	0.99992	4e-05
L. schmidtleri	4820	Turkey	Egrigol/Bergama	39.0239	27.1108	1e-05	1e-05	1e-05	1e-05	0.99992	1e-05	1e-05	1e-05	1e-05	1e-05	1e-05	1e-05	1e-05	0.99992	4e-05
L. schmidtleri	4813	Turkey	Egrigol/Bergama	39.0239	27.1108	1e-05	1e-05	1e-05	1.1e-05	0.999919	1e-05	1e-05	1e-05	1e-05	1e-05	1e-05	1e-05	1.1e-05	0.999919	4e-05
L. schmidtleri	6150	Turkey	Eskikızılelma/Bursa	40.0344	28.7258	1e-05	1e-05	1e-05	1e-05	0.99992	1e-05	1e-05	1e-05	1e-05	1e-05	1e-05	1e-05	1e-05	0.99992	4e-05	1e-05	1e-05	1.13333e-05	0.0128693	0.987059	4e-05
L. schmidtleri	6151	Turkey	Eskikızılelma/Bursa	40.0344	28.7258	1e-05	1e-05	1.3e-05	1e-05	0.999917	1e-05	1e-05	1e-05	1e-05	1e-05	1e-05	1.3e-05	1e-05	0.999917	4e-05
L. schmidtleri	6154	Turkey	Eskikızılelma/Bursa	40.0344	28.7258	1e-05	1e-05	1.1e-05	0.038588	0.961341	1e-05	1e-05	1e-05	1e-05	1e-05	1e-05	1.1e-05	0.038588	0.961341	4e-05
L. schmidtleri	4990	Turkey	Gulluce/Bursa	40.071	28.3528	1e-05	1e-05	1e-05	1e-05	0.99992	1e-05	1e-05	1e-05	1e-05	1e-05	1e-05	1e-05	1e-05	0.99992	4e-05	1e-05	1e-05	1e-05	0.023282	0.976648	4e-05
L. schmidtleri	4991	Turkey	Gulluce/Bursa	40.071	28.3528	1e-05	1e-05	1e-05	1e-05	0.99992	1e-05	1e-05	1e-05	1e-05	1e-05	1e-05	1e-05	1e-05	0.99992	4e-05
L. schmidtleri	4987	Turkey	Gulluce/Bursa	40.071	28.3528	1e-05	1e-05	1e-05	0.069826	0.930104	1e-05	1e-05	1e-05	1e-05	1e-05	1e-05	1e-05	0.069826	0.930104	4e-05
L. schmidtleri	4779	Turkey	Bozdağ/Ödemiş	38.3129	27.9858	1e-05	1e-05	1e-05	1e-05	0.99992	1e-05	1e-05	1e-05	1e-05	1e-05	1e-05	1e-05	1e-05	0.99992	4e-05	1e-05	1e-05	1e-05	1e-05	0.99992	4e-05
L. schmidtleri	6133	Turkey	Hürriyet/Karacabey	40.2759	28.6498	1e-05	1e-05	1.6e-05	0.008911	0.991013	1e-05	1e-05	1e-05	1e-05	1e-05	1e-05	1.6e-05	0.008911	0.991013	4e-05	1e-05	1e-05	1.6e-05	0.008911	0.991013	4e-05
L. schmidtleri	5031	Turkey	Menderes/İzmir	38.2805	27.1479	1e-05	1e-05	1e-05	1e-05	0.99992	1e-05	1e-05	1e-05	1e-05	1e-05	1e-05	1e-05	1e-05	0.99992	4e-05	1e-05	1e-05	1e-05	0.0476163	0.952314	4e-05
L. schmidtleri	5035	Turkey	Menderes/İzmir	38.2805	27.1479	1e-05	1e-05	1e-05	1e-05	0.99992	1e-05	1e-05	1e-05	1e-05	1e-05	1e-05	1e-05	1e-05	0.99992	4e-05
L. schmidtleri	5030	Turkey	Menderes/İzmir	38.2805	27.1479	1e-05	1e-05	1e-05	0.142829	0.857101	1e-05	1e-05	1e-05	1e-05	1e-05	1e-05	1e-05	0.142829	0.857101	4e-05
L. schmidtleri	5016	Turkey	Kapakli/Akhisar	38.873	27.7489	1e-05	1e-05	1e-05	1e-05	0.99992	1e-05	1e-05	1e-05	1e-05	1e-05	1e-05	1e-05	1e-05	0.99992	4e-05	1e-05	1e-05	1e-05	0.0107533	0.989177	4e-05
L. schmidtleri	5015	Turkey	Kapakli/Akhisar	38.873	27.7489	1e-05	1e-05	1e-05	1e-05	0.99992	1e-05	1e-05	1e-05	1e-05	1e-05	1e-05	1e-05	1e-05	0.99992	4e-05
L. schmidtleri	5022	Turkey	Kapakli/Akhisar	38.873	27.7489	1e-05	1e-05	1e-05	0.03224	0.96769	1e-05	1e-05	1e-05	1e-05	1e-05	1e-05	1e-05	0.03224	0.96769	4e-05
L. schmidtleri	4791	Turkey	Karagol/İzmir	38.5601	27.218	1e-05	1e-05	1.3e-05	0.010131	0.989796	1e-05	1e-05	1e-05	1e-05	1e-05	1e-05	1.3e-05	0.010131	0.989796	4e-05	1e-05	1e-05	1.3e-05	0.010131	0.989796	4e-05
L. schmidtleri	5043	Turkey	Kesan/Edirne	40.9167	26.6333	1e-05	1e-05	1e-05	1e-05	0.999915	1e-05	1e-05	1.5e-05	1e-05	1e-05	1e-05	1e-05	1e-05	0.999915	4.5e-05	1e-05	1e-05	1e-05	0.026038	0.973886	4.55e-05
L. schmidtleri	5038	Turkey	Kesan/Edirne	40.9167	26.6333	1e-05	1e-05	1e-05	0.052066	0.947858	1e-05	1e-05	1.6e-05	1e-05	1e-05	1e-05	1e-05	0.052066	0.947858	4.6e-05
L. schmidtleri	5011	Turkey	Kocabey/Balıkesir	39.3521	28.2168	1e-05	1e-05	1e-05	1e-05	0.99992	1e-05	1e-05	1e-05	1e-05	1e-05	1e-05	1e-05	1e-05	0.99992	4e-05	1e-05	1e-05	1e-05	0.0409687	0.956973	0.002028
L. schmidtleri	5009	Turkey	Kocabey/Balıkesir	39.3521	28.2168	1e-05	1e-05	1e-05	1e-05	0.99992	1e-05	1e-05	1e-05	1e-05	1e-05	1e-05	1e-05	1e-05	0.99992	4e-05
L. schmidtleri	5001	Turkey	Kocabey/Balıkesir	39.3521	28.2168	1e-05	1e-05	1e-05	0.122886	0.87108	1e-05	1e-05	0.005974	1e-05	1e-05	1e-05	1e-05	0.122886	0.87108	0.006004
L. schmidtleri	6146	Turkey	Küçükyenice/Mudanya	40.2758	28.8444	1e-05	1e-05	1e-05	1e-05	0.99992	1e-05	1e-05	1e-05	1e-05	1e-05	1e-05	1e-05	1e-05	0.99992	4e-05	1e-05	1e-05	1e-05	1e-05	0.99992	4e-05
L. schmidtleri	6145	Turkey	Küçükyenice/Mudanya	40.2758	28.8444	1e-05	1e-05	1e-05	1e-05	0.99992	1e-05	1e-05	1e-05	1e-05	1e-05	1e-05	1e-05	1e-05	0.99992	4e-05
L. schmidtleri	6147	Turkey	Küçükyenice/Mudanya	40.2758	28.8444	1e-05	1e-05	1e-05	1e-05	0.99992	1e-05	1e-05	1e-05	1e-05	1e-05	1e-05	1e-05	1e-05	0.99992	4e-05
L. schmidtleri	4870	Turkey	Pitireli/Çanakkale	39.7738	26.4599	1e-05	1e-05	1e-05	1e-05	0.99992	1e-05	1e-05	1e-05	1e-05	1e-05	1e-05	1e-05	1e-05	0.99992	4e-05	1e-05	1e-05	1.1e-05	1e-05	0.999917	4.16667e-05
L. schmidtleri	4867	Turkey	Pitireli/Çanakkale	39.7738	26.4599	1e-05	1e-05	1.3e-05	1e-05	0.999917	1e-05	1e-05	1e-05	1e-05	1e-05	1e-05	1.3e-05	1e-05	0.999917	4e-05
L. schmidtleri	4874	Turkey	Pitireli/Çanakkale	39.7738	26.4599	1e-05	1e-05	1e-05	1e-05	0.999915	1e-05	1e-05	1.5e-05	1e-05	1e-05	1e-05	1e-05	1e-05	0.999915	4.5e-05
L. schmidtleri	4839	Turkey	Sapanca/Çanakkale	39.6412	26.4023	1e-05	1e-05	1e-05	1e-05	0.99992	1e-05	1e-05	1e-05	1e-05	1e-05	1e-05	1e-05	1e-05	0.99992	4e-05	1e-05	1e-05	1e-05	1e-05	0.99992	4e-05
L. schmidtleri	4831	Turkey	Sapanca/Çanakkale	39.6412	26.4023	1e-05	1e-05	1e-05	1e-05	0.99992	1e-05	1e-05	1e-05	1e-05	1e-05	1e-05	1e-05	1e-05	0.99992	4e-05
L. schmidtleri	4833	Turkey	Sapanca/Çanakkale	39.6412	26.4023	1e-05	1e-05	1e-05	1e-05	0.99992	1e-05	1e-05	1e-05	1e-05	1e-05	1e-05	1e-05	1e-05	0.99992	4e-05
L. schmidtleri	7853	Turkey	Sarıcaali/Kırklareli	41.4171	27.2233	1e-05	1e-05	1e-05	1e-05	0.99992	1e-05	1e-05	1e-05	1e-05	1e-05	1e-05	1e-05	1e-05	0.99992	4e-05	1e-05	1e-05	0.00213367	0.001003	0.996803	4.1e-05
L. schmidtleri	7852	Turkey	Sarıcaali/Kırklareli	41.4171	27.2233	1e-05	1e-05	1e-05	1e-05	0.99992	1e-05	1e-05	1e-05	1e-05	1e-05	1e-05	1e-05	1e-05	0.99992	4e-05
L. schmidtleri	7851	Turkey	Sarıcaali/Kırklareli	41.4171	27.2233	1e-05	1e-05	0.006381	0.002989	0.990568	1.3e-05	1e-05	1e-05	1e-05	1e-05	1e-05	0.006381	0.002989	0.990568	4.3e-05
L. schmidtleri	4923	Turkey	Subasi/Karacabey	40.2598	28.5359	1e-05	1e-05	1e-05	1e-05	0.999919	1e-05	1.1e-05	1e-05	1e-05	1e-05	1e-05	1e-05	1e-05	0.999919	4.1e-05	1e-05	1e-05	1e-05	1e-05	0.999919	4.1e-05
L. schmidtleri	4891	Turkey	Ulukir/Gönen	40.2168	27.6195	1e-05	1e-05	1e-05	1e-05	0.99992	1e-05	1e-05	1e-05	1e-05	1e-05	1e-05	1e-05	1e-05	0.99992	4e-05	1e-05	1e-05	1.13333e-05	1e-05	0.999918	4.03333e-05
L. schmidtleri	4893	Turkey	Ulukir/Gönen	40.2168	27.6195	1e-05	1e-05	1e-05	1e-05	0.999919	1e-05	1e-05	1.1e-05	1e-05	1e-05	1e-05	1e-05	1e-05	0.999919	4.1e-05
L. schmidtleri	4901	Turkey	Ulukir/Gönen	40.2168	27.6195	1e-05	1e-05	1.4e-05	1e-05	0.999916	1e-05	1e-05	1e-05	1e-05	1e-05	1e-05	1.4e-05	1e-05	0.999916	4e-05
L. schmidtleri	6140	Turkey	Yaliciftlik/Mudanya	40.3464	28.7192	1e-05	1e-05	1e-05	1e-05	0.99992	1e-05	1e-05	1e-05	1e-05	1e-05	1e-05	1e-05	1e-05	0.99992	4e-05	1e-05	1e-05	1.06667e-05	1.03333e-05	0.999919	4e-05
L. schmidtleri	6139	Turkey	Yaliciftlik/Mudanya	40.3464	28.7192	1e-05	1e-05	1e-05	1e-05	0.99992	1e-05	1e-05	1e-05	1e-05	1e-05	1e-05	1e-05	1e-05	0.99992	4e-05
L. schmidtleri	6138	Turkey	Yaliciftlik/Mudanya	40.3464	28.7192	1e-05	1e-05	1.2e-05	1.1e-05	0.999917	1e-05	1e-05	1e-05	1e-05	1e-05	1e-05	1.2e-05	1.1e-05	0.999917	4e-05
L. schmidtleri	4880	Turkey	Yaya/Çan	40.0096	26.94	1e-05	1e-05	1e-05	1e-05	0.99992	1e-05	1e-05	1e-05	1e-05	1e-05	1e-05	1e-05	1e-05	0.99992	4e-05	1e-05	1e-05	1e-05	1e-05	0.99992	4e-05
L. schmidtleri	4882	Turkey	Yaya/Çan	40.0096	26.94	1e-05	1e-05	1e-05	1e-05	0.99992	1e-05	1e-05	1e-05	1e-05	1e-05	1e-05	1e-05	1e-05	0.99992	4e-05
L. schmidtleri	4886	Turkey	Yaya/Çan	40.0096	26.94	1e-05	1e-05	1e-05	1e-05	0.99992	1e-05	1e-05	1e-05	1e-05	1e-05	1e-05	1e-05	1e-05	0.99992	4e-05
L. schmidtleri	4911	Turkey	Yenice/Bandırma	40.2577	28.1111	1e-05	1e-05	1e-05	0.010845	0.989085	1e-05	1e-05	1e-05	1e-05	1e-05	1e-05	1e-05	0.010845	0.989085	4e-05	1e-05	1e-05	1e-05	0.010845	0.989085	4e-05
L. vulgaris	10498	Bosnia and Herzegovina	Bosansko Grahovo	44.179	16.363	1e-05	1e-05	1e-05	1e-05	1e-05	1e-05	0.215062	1e-05	0.784868	1e-05	1e-05	1e-05	1e-05	1e-05	0.99995	1e-05	1e-05	1e-05	1e-05	1e-05	0.99995
L. vulgaris	10519	Bosnia and Herzegovina	Kijevo	43.755	18.408	1e-05	1e-05	1e-05	1e-05	1e-05	1e-05	1e-05	1e-05	0.99992	1e-05	1e-05	1e-05	1e-05	1e-05	0.99995	1e-05	1e-05	1e-05	1e-05	1e-05	0.99995
L. vulgaris	10510	Bosnia and Herzegovina	Zelengora	43.354	18.546	1e-05	1e-05	1e-05	1e-05	1e-05	1e-05	0.125535	1e-05	0.874395	1e-05	1e-05	1e-05	1e-05	1e-05	0.99995	1e-05	1e-05	1e-05	1e-05	1e-05	0.99995
L. vulgaris	8368	Bosnia and Herzegovina	Han Pijesak	44.0958	18.9589	0.012773	1e-05	1e-05	1e-05	1e-05	1e-05	1e-05	1e-05	0.987157	0.012773	1e-05	1e-05	1e-05	1e-05	0.987187	0.012773	1e-05	1e-05	1e-05	1e-05	0.987187
L. vulgaris	8364	Bosnia and Herzegovina	Klupe	44.6014	17.6106	0.011281	1e-05	1e-05	0.024953	1e-05	1e-05	0.001743	1e-05	0.961974	0.011281	1e-05	1e-05	0.024953	1e-05	0.963737	0.011281	1e-05	1e-05	0.024953	1e-05	0.963737
L. vulgaris	10701	Bulgaria	Barlia	43.1281	22.9922	1e-05	1e-05	1e-05	1e-05	1e-05	0.020578	1e-05	1e-05	0.979352	1e-05	1e-05	1e-05	1e-05	1e-05	0.99995	1e-05	1e-05	1e-05	1e-05	1e-05	0.99995
L. vulgaris	3674	Bulgaria	Borovan	43.409	23.769	1e-05	1e-05	1e-05	1e-05	0.051869	0.024789	1e-05	0.074299	0.848993	1e-05	1e-05	1e-05	1e-05	0.051869	0.948091	1e-05	1e-05	1e-05	1e-05	0.051869	0.948091
L. vulgaris	3680	Bulgaria	Borovitsa	43.59	22.77	1e-05	1e-05	0.002394	1e-05	0.00843	0.024394	0.044745	0.014679	0.905328	1e-05	1e-05	0.002394	1e-05	0.00843	0.989146	1e-05	1e-05	0.002394	1e-05	0.00843	0.989146
L. vulgaris	10695	Bulgaria	Botevgrad	42.891	23.7926	1e-05	1e-05	1e-05	1e-05	0.014893	0.047293	1e-05	0.150751	0.787012	1e-05	1e-05	1e-05	1e-05	0.014893	0.985066	1e-05	1e-05	1e-05	1e-05	0.014893	0.985066
L. vulgaris	10705	Bulgaria	Dobri Dol	43.7845	23.0232	1e-05	1e-05	1e-05	1e-05	1e-05	0.168665	1e-05	0.016691	0.814584	1e-05	1e-05	1e-05	1e-05	1e-05	0.99995	1e-05	1e-05	1e-05	1e-05	1e-05	0.99995
L. vulgaris	5385	Bulgaria	Dolni Dabnik	43.404	24.48	1e-05	1e-05	1e-05	1e-05	0.02819	0.051225	1e-05	0.247789	0.672746	1e-05	1e-05	1e-05	1e-05	0.02819	0.97177	1e-05	1e-05	1e-05	1e-05	0.02819	0.97177
L. vulgaris	3696	Bulgaria	Golesh	43.046	22.947	1e-05	1e-05	1e-05	1e-05	1e-05	1e-05	1e-05	1e-05	0.99992	1e-05	1e-05	1e-05	1e-05	1e-05	0.99995	1e-05	1e-05	1e-05	1e-05	1e-05	0.99995
L. vulgaris	3676	Bulgaria	Harlets	43.711	23.842	1e-05	1e-05	0.00677	1e-05	0.013565	0.108422	1e-05	0.042138	0.829065	1e-05	1e-05	0.00677	1e-05	0.013565	0.979635	1e-05	1e-05	0.00677	1e-05	0.013565	0.979635
L. vulgaris	10694	Bulgaria	Kakrina	43.0981	24.8927	1e-05	1e-05	1.8e-05	1e-05	0.041088	0.11474	1e-05	0.435004	0.40911	1e-05	1e-05	1.8e-05	1e-05	0.041088	0.958864	1e-05	1e-05	1.8e-05	1e-05	0.041088	0.958864
L. vulgaris	10700	Bulgaria	Kireevo	43.789	22.4112	1e-05	1e-05	0.014657	1e-05	1e-05	0.058488	1e-05	1e-05	0.926795	1e-05	1e-05	0.014657	1e-05	1e-05	0.985303	1e-05	1e-05	0.014657	1e-05	1e-05	0.985303
L. vulgaris	487	Bulgaria	Klisura	42.3336	23.3803	1e-05	1e-05	1e-05	1e-05	0.036884	0.017617	1e-05	0.006707	0.938742	1e-05	1e-05	1e-05	1e-05	0.036884	0.963076	1e-05	1e-05	1e-05	1e-05	0.036884	0.963076
L. vulgaris	10721	Bulgaria	Palilula	43.4319	23.373	1e-05	0.022102	0.021745	1e-05	0.021327	0.030093	1e-05	0.069978	0.834725	1e-05	0.022102	0.021745	1e-05	0.021327	0.934806	1e-05	0.022102	0.021745	1e-05	0.021327	0.934806
L. vulgaris	5441	Bulgaria	Strahilitsa	43.489	26.916	1e-05	1e-05	1e-05	1e-05	0.108134	0.025125	1e-05	0.689272	0.177419	1e-05	1e-05	1e-05	1e-05	0.108134	0.891826	1e-05	1e-05	1e-05	1e-05	0.108134	0.891826
L. vulgaris	5411	Bulgaria	Tsarski Izvor	43.242	25.898	1e-05	1e-05	1e-05	1e-05	0.06716	0.04913	1e-05	0.638326	0.245335	1e-05	1e-05	1e-05	1e-05	0.06716	0.932801	1e-05	1e-05	0.0150013	1e-05	0.05881	0.926159
L. vulgaris	5428	Bulgaria	Tsarski Izvor	43.242	25.898	1e-05	1e-05	0.017454	1e-05	0.059541	0.013318	1e-05	0.594833	0.314814	1e-05	1e-05	0.017454	1e-05	0.059541	0.922975
L. vulgaris	5427	Bulgaria	Tsarski Izvor	43.242	25.898	1e-05	1e-05	0.02754	1e-05	0.049729	0.099153	1e-05	0.561241	0.262298	1e-05	1e-05	0.02754	1e-05	0.049729	0.922702
L. vulgaris	5340	Bulgaria	Valchek	43.776	22.743	1e-05	1e-05	1e-05	1e-05	1e-05	0.071891	0.065934	0.022534	0.839591	1e-05	1e-05	1e-05	1e-05	1e-05	0.99995	1e-05	1e-05	1e-05	1e-05	1e-05	0.99995
L. vulgaris	10697	Bulgaria	Vladaya	42.631	23.1835	1e-05	1e-05	1e-05	1e-05	1e-05	1e-05	1e-05	1e-05	0.99992	1e-05	1e-05	1e-05	1e-05	1e-05	0.99995	1e-05	1e-05	1e-05	1e-05	1e-05	0.99995
L. vulgaris	4356	Croatia	Barban1	45.0635	14.0096	1e-05	1e-05	1e-05	1e-05	1e-05	1e-05	0.953085	1e-05	0.046845	1e-05	1e-05	1e-05	1e-05	1e-05	0.99995	1e-05	1e-05	1e-05	1e-05	1e-05	0.99995
L. vulgaris	4313	Croatia	Donja Ploča	44.4557	15.6553	0.017593	1e-05	1e-05	1e-05	1e-05	1e-05	0.287474	1e-05	0.694872	0.017593	1e-05	1e-05	1e-05	1e-05	0.982366	0.017593	1e-05	1e-05	1e-05	1e-05	0.982366
L. vulgaris	10466	Croatia	Karlovac	45.493	15.555	1e-05	1e-05	1e-05	1e-05	1e-05	1e-05	0.282732	1e-05	0.717198	1e-05	1e-05	1e-05	1e-05	1e-05	0.99995	1e-05	1e-05	1e-05	1e-05	1e-05	0.99995
L. vulgaris	10490	Croatia	Mokro Polje	44.072	16.041	1e-05	1e-05	1e-05	1e-05	1e-05	1e-05	0.049282	1e-05	0.950648	1e-05	1e-05	1e-05	1e-05	1e-05	0.99995	1e-05	1e-05	1e-05	1e-05	1e-05	0.99995
L. vulgaris	4427	Croatia	Novi Mihaljevci	45.3912	17.6787	1e-05	1e-05	1e-05	0.007055	1e-05	1e-05	0.015427	1e-05	0.977458	1e-05	1e-05	1e-05	0.007055	1e-05	0.992905	1e-05	1e-05	1e-05	0.007055	1e-05	0.992905
L. vulgaris	10534	Croatia	Peteranec	46.194	16.887	1e-05	1e-05	1e-05	0.00781	1e-05	1e-05	0.093918	1e-05	0.898212	1e-05	1e-05	1e-05	0.00781	1e-05	0.99215	1e-05	1e-05	1e-05	0.00781	1e-05	0.99215
L. vulgaris	10486	Croatia	Plosna	45.347	14.544	1e-05	1e-05	1e-05	1e-05	1e-05	1e-05	0.946494	1e-05	0.053436	1e-05	1e-05	1e-05	1e-05	1e-05	0.99995	1e-05	1e-05	1e-05	1e-05	1e-05	0.99995
L. vulgaris	4405	Croatia	Popovic Brdo	45.4522	15.6463	1e-05	0.010313	1e-05	1e-05	1e-05	1e-05	0.196669	1e-05	0.792958	1e-05	0.010313	1e-05	1e-05	1e-05	0.989647	1e-05	0.010313	1e-05	1e-05	1e-05	0.989647
L. vulgaris	10816	Croatia	Roč	45.3977	14.0509	1e-05	1e-05	0.015362	1e-05	1e-05	1e-05	0.925466	1e-05	0.059112	1e-05	1e-05	0.015362	1e-05	1e-05	0.984598	1e-05	1e-05	0.015362	1e-05	1e-05	0.984598
L. vulgaris	4777	Croatia	Salakovac	45.0525	14.0869	1e-05	1e-05	1e-05	1e-05	1e-05	1e-05	0.952187	1e-05	0.047743	1e-05	1e-05	1e-05	1e-05	1e-05	0.99995	1e-05	1e-05	1e-05	1e-05	1e-05	0.99995
L. vulgaris	10438	Croatia	Sinj	43.703	16.637	0.007283	1e-05	1e-05	1e-05	1e-05	1e-05	0.05731	1e-05	0.935347	0.007283	1e-05	1e-05	1e-05	1e-05	0.992677	0.007283	1e-05	1e-05	1e-05	1e-05	0.992677
L. vulgaris	4293	Croatia	Smilčić	44.1278	15.4766	1e-05	1e-05	1e-05	0.011221	1e-05	1e-05	0.056669	1e-05	0.93205	1e-05	1e-05	1e-05	0.011221	1e-05	0.988739	1e-05	1e-05	1e-05	0.011221	1e-05	0.988739
L. vulgaris	10431	Croatia	Smiljan	44.564	15.32	1e-05	1e-05	1e-05	1e-05	1e-05	1e-05	0.269686	1e-05	0.730244	1e-05	1e-05	1e-05	1e-05	1e-05	0.99995	1e-05	1e-05	1e-05	1e-05	1e-05	0.99995
L. vulgaris	4377	Croatia	Srsici	45.1447	14.5481	1e-05	1e-05	1e-05	1.3e-05	1e-05	1e-05	0.856444	1e-05	0.143483	1e-05	1e-05	1e-05	1.3e-05	1e-05	0.999947	1e-05	1e-05	1e-05	1.3e-05	1e-05	0.999947
L. vulgaris	10817	Croatia	Svetvinčenat	45.068	13.8765	1e-05	1e-05	1e-05	1e-05	1e-05	1e-05	0.994698	1e-05	0.005232	1e-05	1e-05	1e-05	1e-05	1e-05	0.99995	1e-05	1e-05	1e-05	1e-05	1e-05	0.99995
L. vulgaris	4283	Croatia	Zagrad	44.0688	15.5327	1e-05	1e-05	1e-05	1e-05	1e-05	1e-05	0.021722	1e-05	0.978208	1e-05	1e-05	1e-05	1e-05	1e-05	0.99995	1e-05	1e-05	1e-05	1e-05	1e-05	0.99995
L. vulgaris	10258	Czech Republic	Praha-Karlín	50.1003	14.4603	1e-05	1e-05	1e-05	1e-05	1e-05	1e-05	0.051987	0.246765	0.701188	1e-05	1e-05	1e-05	1e-05	1e-05	0.99995	1e-05	1e-05	1e-05	1e-05	1e-05	0.99995
L. vulgaris	5050	Czech Republic	Slavhostice	50.3	15.35	1e-05	1e-05	1e-05	0.022331	1e-05	0.000163	0.022682	0.214963	0.739822	1e-05	1e-05	1e-05	0.022331	1e-05	0.97763	1e-05	1e-05	1e-05	0.022331	1e-05	0.97763
L. vulgaris	5046	France	Ambleteuse	50.78	1.61	1e-05	1e-05	1e-05	1e-05	1e-05	1e-05	0.105144	0.29126	0.603536	1e-05	1e-05	1e-05	1e-05	1e-05	0.99995	1e-05	1e-05	1e-05	1e-05	1e-05	0.99995
L. vulgaris	5048	France	Mayenne	48.3	0.6	1e-05	1e-05	0.007634	1e-05	1e-05	1e-05	0.180498	0.249265	0.562553	1e-05	1e-05	0.007634	1e-05	1e-05	0.992326	1e-05	1e-05	0.007634	1e-05	1e-05	0.992326
L. vulgaris	551	Hungary	Bátászek	46.2	18.8235	1e-05	1e-05	1e-05	1e-05	1e-05	1e-05	1e-05	1e-05	0.99992	1e-05	1e-05	1e-05	1e-05	1e-05	0.99995	1e-05	1e-05	1e-05	1e-05	1e-05	0.99995
L. vulgaris	6000	Hungary	Erdohorvati	48.2754	21.3469	1e-05	1e-05	1e-05	1e-05	1e-05	0.766431	1e-05	1e-05	0.233499	1e-05	1e-05	1e-05	1e-05	1e-05	0.99995	1e-05	1e-05	1e-05	1e-05	1e-05	0.99995
L. vulgaris	6070	Hungary	Harsany	48.0133	20.7628	1e-05	1e-05	1e-05	1e-05	1e-05	0.573577	1e-05	1e-05	0.426353	1e-05	1e-05	1e-05	1e-05	1e-05	0.99995	1e-05	1e-05	1e-05	1e-05	1e-05	0.99995
L. vulgaris	6018	Hungary	Olaszliszka	48.2299	21.4139	1e-05	1e-05	1e-05	1e-05	1e-05	0.99992	1e-05	1e-05	1e-05	1e-05	1e-05	1e-05	1e-05	1e-05	0.99995	1e-05	1e-05	1e-05	1e-05	1e-05	0.99995
L. vulgaris	6039	Hungary	Tiszacsege	47.7074	20.9493	1e-05	1e-05	1e-05	1e-05	1e-05	0.837188	1e-05	1e-05	0.162742	1e-05	1e-05	1e-05	1e-05	1e-05	0.99995	1e-05	1e-05	1e-05	1e-05	1e-05	0.99995
L. vulgaris	605	Hungary	Zalaháshágy1	46.9085	16.6105	1e-05	1e-05	1e-05	1e-05	1e-05	1e-05	0.047515	1e-05	0.952415	1e-05	1e-05	1e-05	1e-05	1e-05	0.99995	1e-05	1e-05	1e-05	1e-05	1e-05	0.99995
L. vulgaris	573	Hungary	Zalaháshágy2	46.9258	16.6216	1e-05	1e-05	1e-05	1e-05	1e-05	1e-05	0.074751	1e-05	0.925179	1e-05	1e-05	1e-05	1e-05	1e-05	0.99995	1e-05	1e-05	1e-05	1e-05	1e-05	0.99995
L. vulgaris	10782	Italy	Caleri	45.0996	12.3312	1e-05	1e-05	1e-05	1e-05	1.3e-05	1e-05	0.999917	1e-05	1e-05	1e-05	1e-05	1e-05	1e-05	1.3e-05	0.999947	1e-05	1e-05	1e-05	1e-05	1.3e-05	0.999947
L. vulgaris	10792	Italy	Camaldoli	43.7939	11.8221	1e-05	1.2e-05	1e-05	1e-05	1e-05	1.9e-05	0.999909	1e-05	1e-05	1e-05	1.2e-05	1e-05	1e-05	1e-05	0.999948	1e-05	1.2e-05	1e-05	1e-05	1e-05	0.999948
L. vulgaris	10830	Italy	Canale Monterano	42.1267	12.0463	1e-05	1e-05	1e-05	1e-05	1e-05	1e-05	0.99992	1e-05	1e-05	1e-05	1e-05	1e-05	1e-05	1e-05	0.99995	1e-05	1e-05	1e-05	1e-05	1e-05	0.99995
L. vulgaris	10819	Italy	Canavera	44.9217	9.23554	1.6e-05	1e-05	1e-05	1.4e-05	1.5e-05	1e-05	0.999906	1e-05	1e-05	1.6e-05	1e-05	1e-05	1.4e-05	1.5e-05	0.999936	1.6e-05	1e-05	1e-05	1.4e-05	1.5e-05	0.999936
L. vulgaris	10820	Italy	Castelleone	45.28	9.76234	1e-05	1e-05	1e-05	1e-05	1e-05	1e-05	0.99992	1e-05	1e-05	1e-05	1e-05	1e-05	1e-05	1e-05	0.99995	1e-05	1e-05	1e-05	1e-05	1e-05	0.99995
L. vulgaris	10828	Italy	Colli del Vivaro	41.7645	12.7954	1e-05	1e-05	1e-05	1e-05	1e-05	1e-05	0.99992	1e-05	1e-05	1e-05	1e-05	1e-05	1e-05	1e-05	0.99995	1e-05	1e-05	1e-05	1e-05	1e-05	0.99995
L. vulgaris	10770	Italy	Dogna	46.4507	13.3071	1e-05	1e-05	1e-05	1e-05	1e-05	1e-05	0.149886	1e-05	0.850044	1e-05	1e-05	1e-05	1e-05	1e-05	0.99995	1e-05	1e-05	1e-05	1e-05	1e-05	0.99995
L. vulgaris	10818	Italy	Donega	44.9426	9.24184	1e-05	1e-05	1e-05	1e-05	1e-05	1e-05	0.99992	1e-05	1e-05	1e-05	1e-05	1e-05	1e-05	1e-05	0.99995	1e-05	1e-05	1e-05	1e-05	1e-05	0.99995
L. vulgaris	10824	Italy	Greve in Chianti	43.5917	11.3028	1e-05	1e-05	1e-05	1e-05	1e-05	1e-05	0.99992	1e-05	1e-05	1e-05	1e-05	1e-05	1e-05	1e-05	0.99995	1e-05	1e-05	1e-05	1e-05	1e-05	0.99995
L. vulgaris	10827	Italy	Ladispoli	41.9403	12.0965	1e-05	1e-05	1e-05	1e-05	1e-05	1e-05	0.99992	1e-05	1e-05	1e-05	1e-05	1e-05	1e-05	1e-05	0.99995	1e-05	1e-05	1e-05	1e-05	1e-05	0.99995
L. vulgaris	10829	Italy	Moricone	42.1021	12.7874	1e-05	1e-05	1e-05	1e-05	1e-05	1e-05	0.972734	0.027196	1e-05	1e-05	1e-05	1e-05	1e-05	1e-05	0.99995	1e-05	1e-05	1e-05	1e-05	1e-05	0.99995
L. vulgaris	10826	Italy	Nespolo	42.1529	13.0473	1e-05	1e-05	1e-05	1e-05	1e-05	1e-05	0.99992	1e-05	1e-05	1e-05	1e-05	1e-05	1e-05	1e-05	0.99995	1e-05	1e-05	1e-05	1e-05	1e-05	0.99995
L. vulgaris	10787	Italy	Pianoro	44.3877	11.3444	1e-05	1e-05	1e-05	1e-05	1e-05	1e-05	0.99992	1e-05	1e-05	1e-05	1e-05	1e-05	1e-05	1e-05	0.99995	1e-05	1e-05	1e-05	1e-05	1e-05	0.99995
L. vulgaris	10825	Italy	Rocca di Mezzo	42.1613	13.6366	1e-05	1e-05	1e-05	1e-05	1e-05	1e-05	0.99992	1e-05	1e-05	1e-05	1e-05	1e-05	1e-05	1e-05	0.99995	1e-05	1e-05	1e-05	1e-05	1e-05	0.99995
L. vulgaris	10794	Italy	Sabaudia	41.3474	13.0432	1e-05	1e-05	1e-05	1e-05	1e-05	1e-05	0.99992	1e-05	1e-05	1e-05	1e-05	1e-05	1e-05	1e-05	0.99995	1e-05	1e-05	1e-05	1e-05	1e-05	0.99995
L. vulgaris	10821	Italy	San Germiniano	44.7245	10.4421	1e-05	1e-05	2e-05	1e-05	1e-05	1e-05	0.99991	1e-05	1e-05	1e-05	1e-05	2e-05	1e-05	1e-05	0.99994	1e-05	1e-05	2e-05	1e-05	1e-05	0.99994
L. vulgaris	10804	Italy	Santi Angeli	45.8341	12.1505	1e-05	1e-05	1e-05	1e-05	1e-05	1.6e-05	0.999911	1.3e-05	1e-05	1e-05	1e-05	1e-05	1e-05	1e-05	0.99995	1e-05	1e-05	1e-05	1e-05	1e-05	0.99995
L. vulgaris	10822	Italy	Senigallia	43.6906	13.2044	1e-05	1e-05	1e-05	1e-05	1e-05	1e-05	0.999918	1.2e-05	1e-05	1e-05	1e-05	1e-05	1e-05	1e-05	0.99995	1e-05	1e-05	1e-05	1e-05	1e-05	0.99995
L. vulgaris	10796	Italy	Sepino	41.41	14.62	1e-05	1e-05	1e-05	1e-05	1e-05	1e-05	0.99992	1e-05	1e-05	1e-05	1e-05	1e-05	1e-05	1e-05	0.99995	1e-05	1e-05	1e-05	1e-05	1e-05	0.99995
L. vulgaris	10776	Italy	Tarvisio	46.5128	13.5696	1e-05	1e-05	1e-05	1e-05	1e-05	1e-05	0.191725	1e-05	0.808205	1e-05	1e-05	1e-05	1e-05	1e-05	0.99995	1e-05	1e-05	1e-05	1e-05	1e-05	0.99995
L. vulgaris	3413	Kosovo	Ljesane	42.641	20.425	0.076583	1e-05	1e-05	1e-05	1e-05	0.026529	1e-05	1e-05	0.896827	0.076583	1e-05	1e-05	1e-05	1e-05	0.923376	0.076583	1e-05	1e-05	1e-05	1e-05	0.923376
L. vulgaris	3421	Kosovo	Xërze	42.341	20.573	0.147213	1e-05	1e-05	1e-05	1e-05	1e-05	1e-05	1e-05	0.852717	0.147213	1e-05	1e-05	1e-05	1e-05	0.852747	0.147213	1e-05	1e-05	1e-05	1e-05	0.852747
L. vulgaris	10507	Macedonia	Brzak	42.065	21.676	1e-05	1e-05	1.2e-05	1e-05	1e-05	0.052272	1e-05	1e-05	0.947656	1e-05	1e-05	1.2e-05	1e-05	1e-05	0.999948	1e-05	1e-05	1.2e-05	1e-05	1e-05	0.999948
L. vulgaris	10393	Macedonia	Kriva Palanka	42.206	22.331	0.024577	1e-05	1e-05	1e-05	1e-05	1e-05	1e-05	1e-05	0.975353	0.024577	1e-05	1e-05	1e-05	1e-05	0.975383	0.024577	1e-05	1e-05	1e-05	1e-05	0.975383
L. vulgaris	10449	Macedonia	Stracin	42.151	22.033	0.019556	1e-05	0.020328	0.026818	1e-05	1e-05	1e-05	1.4e-05	0.933244	0.019556	1e-05	0.020328	0.026818	1e-05	0.933278	0.019556	1e-05	0.020328	0.026818	1e-05	0.933278
L. vulgaris	10241	Montenegro	Biogradsko-Jezero	42.8958	19.6	1e-05	1e-05	0.004822	1e-05	1e-05	1e-05	1e-05	1e-05	0.995108	1e-05	1e-05	0.004822	1e-05	1e-05	0.995138	1e-05	1e-05	0.004822	1e-05	1e-05	0.995138
L. vulgaris	10222	Montenegro	Bukumirsko-Jezero	42.604	19.5562	1e-05	1e-05	1e-05	0.01614	1e-05	1e-05	1e-05	1e-05	0.98379	1e-05	1e-05	1e-05	0.01614	1e-05	0.98382	1e-05	1e-05	1e-05	0.01614	1e-05	0.98382
L. vulgaris	10401	Montenegro	Stabno	43.199	18.722	1e-05	1e-05	1e-05	1e-05	1e-05	1e-05	1e-05	1e-05	0.99992	1e-05	1e-05	1e-05	1e-05	1e-05	0.99995	1e-05	1e-05	1e-05	1e-05	1e-05	0.99995
L. vulgaris	10239	Montenegro	Zminicko-Jezero	43.1001	19.2458	1e-05	1e-05	1e-05	1e-05	1e-05	1e-05	1e-05	1e-05	0.99992	1e-05	1e-05	1e-05	1e-05	1e-05	0.99995	1e-05	1e-05	1e-05	1e-05	1e-05	0.99995
L. vulgaris	1854	Poland	Brończyce	50.2875	20.5281	1e-05	1e-05	1e-05	1e-05	1e-05	1e-05	1e-05	0.99992	1e-05	1e-05	1e-05	1e-05	1e-05	1e-05	0.99995	1e-05	1e-05	1e-05	1e-05	1e-05	0.99995
L. vulgaris	3147	Poland	Gartatowice	50.5809	20.632	1e-05	1e-05	1e-05	1e-05	1e-05	1e-05	1e-05	0.99992	1e-05	1e-05	1e-05	1e-05	1e-05	1e-05	0.99995	1e-05	1e-05	1e-05	1e-05	1e-05	0.99995
L. vulgaris	2242	Poland	Jaszcz	53.5698	18.4543	1e-05	1e-05	1.9e-05	1e-05	1e-05	1e-05	1.6e-05	0.999906	1e-05	1e-05	1e-05	1.9e-05	1e-05	1e-05	0.999942	1e-05	1e-05	1.9e-05	1e-05	1e-05	0.999942
L. vulgaris	2602	Poland	Maćkowice	49.8568	22.7156	1e-05	1e-05	1e-05	1e-05	1e-05	1e-05	1e-05	0.99992	1e-05	1e-05	1e-05	1e-05	1e-05	1e-05	0.99995	1e-05	1e-05	1e-05	1e-05	1e-05	0.99995
L. vulgaris	2189	Poland	Pokrzywna	50.293	17.4541	1e-05	1e-05	1e-05	1.1e-05	1e-05	1e-05	1e-05	0.802505	0.197424	1e-05	1e-05	1e-05	1.1e-05	1e-05	0.999949	1e-05	1e-05	1e-05	1.1e-05	1e-05	0.999949
L. vulgaris	619	Poland	Radzyny	52.5477	16.5658	1e-05	1e-05	1e-05	1e-05	1e-05	1e-05	1e-05	0.99992	1e-05	1e-05	1e-05	1e-05	1e-05	1e-05	0.99995	1e-05	1e-05	1e-05	1e-05	1e-05	0.99995
L. vulgaris	3091	Poland	Samostrzałów	50.5922	20.6406	1e-05	1e-05	1e-05	1e-05	1e-05	1e-05	1e-05	0.99992	1e-05	1e-05	1e-05	1e-05	1e-05	1e-05	0.99995	1e-05	1e-05	1e-05	1e-05	1e-05	0.99995
L. vulgaris	2273	Poland	Spytkowice	49.9963	19.4765	1e-05	1e-05	1e-05	1.1e-05	1e-05	1e-05	1e-05	0.999919	1e-05	1e-05	1e-05	1e-05	1.1e-05	1e-05	0.999949	1e-05	1e-05	1e-05	1.1e-05	1e-05	0.999949
L. vulgaris	2248	Poland	Trzebciny	53.6298	18.1541	1e-05	1e-05	1e-05	1e-05	1e-05	1e-05	1e-05	0.99992	1e-05	1e-05	1e-05	1e-05	1e-05	1e-05	0.99995	1e-05	1e-05	1e-05	1e-05	1e-05	0.99995
L. vulgaris	1468	Romania	Arieseni	46.4653	22.7834	1e-05	1e-05	0.027711	1e-05	1e-05	0.972219	1e-05	1e-05	1e-05	1e-05	1e-05	0.027711	1e-05	1e-05	0.972249	1e-05	1e-05	0.027711	1e-05	1e-05	0.972249
L. vulgaris	1959	Romania	Bixad	46.111	25.9153	1e-05	1e-05	1e-05	0.157266	1e-05	0.271482	1e-05	0.571192	1e-05	1e-05	1e-05	1e-05	0.157266	1e-05	0.842694	1e-05	1e-05	1e-05	0.157266	1e-05	0.842694
L. vulgaris	3012	Romania	Bogdana	47.0275	23.0307	1e-05	1e-05	1e-05	1e-05	1e-05	0.99992	1e-05	1e-05	1e-05	1e-05	1e-05	1e-05	1e-05	1e-05	0.99995	1e-05	1e-05	1e-05	1e-05	1e-05	0.99995
L. vulgaris	1549	Romania	Budeni	45.7679	26.8393	1e-05	1e-05	0.001437	1e-05	1e-05	1e-05	1e-05	0.998493	1e-05	1e-05	1e-05	0.001437	1e-05	1e-05	0.998523	1e-05	1e-05	0.001437	1e-05	1e-05	0.998523
L. vulgaris	3072	Romania	Cărpiniş	45.8776	23.0262	1e-05	1e-05	1e-05	1e-05	1e-05	0.975414	1e-05	0.024516	1e-05	1e-05	1e-05	1e-05	1e-05	1e-05	0.99995	1e-05	1e-05	1e-05	1e-05	1e-05	0.99995
L. vulgaris	1942	Romania	Ciceu	46.4044	25.7899	1e-05	1e-05	1e-05	1e-05	1e-05	0.518978	1e-05	0.480952	1e-05	1e-05	1e-05	1e-05	1e-05	1e-05	0.99995	1e-05	1e-05	1e-05	1e-05	1e-05	0.99995
L. vulgaris	3185	Romania	Grindul Lupilor	44.6213	28.8047	1e-05	1e-05	1e-05	1e-05	1e-05	0.079546	0.025107	0.632722	0.262576	1e-05	1e-05	1e-05	1e-05	1e-05	0.999951	1e-05	1e-05	1e-05	1e-05	1e-05	0.999951
L. vulgaris	2359	Romania	Iorcani	47.3607	26.5266	1e-05	1e-05	1e-05	1e-05	1e-05	1e-05	1e-05	0.99992	1e-05	1e-05	1e-05	1e-05	1e-05	1e-05	0.99995	1e-05	1e-05	1e-05	1e-05	1e-05	0.99995
L. vulgaris	2151	Romania	Jiu Gorge	45.2521	23.4181	1e-05	1e-05	1e-05	1e-05	1e-05	0.90336	1e-05	0.035724	0.060857	1e-05	1e-05	1e-05	1e-05	1e-05	0.999951	1e-05	1e-05	1e-05	1e-05	1e-05	0.999951
L. vulgaris	6263	Romania	Lacul Dunareni	44.2033	27.7853	1e-05	1e-05	0.018956	1e-05	1e-05	0.068036	1e-05	0.198514	0.714444	1e-05	1e-05	0.018956	1e-05	1e-05	0.981004	1e-05	1e-05	0.018956	1e-05	1e-05	0.981004
L. vulgaris	6266	Romania	Lacul Oltina	44.1283	27.6308	1e-05	1e-05	0.042194	1e-05	0.035621	0.085779	1e-05	0.20002	0.636345	1e-05	1e-05	0.042194	1e-05	0.035621	0.922154	1e-05	1e-05	0.042194	1e-05	0.035621	0.922154
L. vulgaris	6269	Romania	Lacul Sf. Ana	46.1266	25.8897	1e-05	1e-05	0.010854	0.077104	1e-05	0.396577	1e-05	0.515415	1e-05	1e-05	1e-05	0.010854	0.077104	1e-05	0.912012	1e-05	1e-05	0.010854	0.077104	1e-05	0.912012
L. vulgaris	1898	Romania	Mănăşturel	47.1895	23.9266	1e-05	1e-05	1e-05	1e-05	1e-05	0.99992	1e-05	1e-05	1e-05	1e-05	1e-05	1e-05	1e-05	1e-05	0.99995	1e-05	1e-05	1e-05	1e-05	1e-05	0.99995
L. vulgaris	6238	Romania	Mercina	45.0628	21.5361	1e-05	1e-05	1e-05	1e-05	1e-05	0.619958	1e-05	1e-05	0.379972	1e-05	1e-05	1e-05	1e-05	1e-05	0.99995	1e-05	1e-05	1e-05	1e-05	1e-05	0.99995
L. vulgaris	2468	Romania	Pădureni	46.5633	26.7881	1e-05	1e-05	1e-05	1e-05	1e-05	1e-05	1e-05	0.99992	1e-05	1e-05	1e-05	1e-05	1e-05	1e-05	0.99995	1e-05	1e-05	1e-05	1e-05	1e-05	0.99995
L. vulgaris	6047	Romania	Pecica1	46.134	21.0522	1e-05	1e-05	1e-05	1e-05	1e-05	0.807679	1e-05	1e-05	0.192251	1e-05	1e-05	1e-05	1e-05	1e-05	0.99995	1e-05	1e-05	1e-05	1e-05	1e-05	0.99995
L. vulgaris	3030	Romania	Peştiş1	47.0891	22.3898	1e-05	1e-05	1e-05	1e-05	1e-05	0.936328	1e-05	1e-05	0.063602	1e-05	1e-05	1e-05	1e-05	1e-05	0.99995	1e-05	1e-05	1e-05	1e-05	1e-05	0.99995
L. vulgaris	1541	Romania	Plopu1	45.054	26.1484	1.1e-05	1e-05	1e-05	1e-05	0.030554	1e-05	1e-05	0.969375	1e-05	1.1e-05	1e-05	1e-05	1e-05	0.030554	0.969405	1.1e-05	1e-05	1e-05	1e-05	0.030554	0.969405
L. vulgaris	1859	Romania	Pomi	47.6935	23.3204	1e-05	1e-05	1e-05	1e-05	1e-05	0.99992	1e-05	1e-05	1e-05	1e-05	1e-05	1e-05	1e-05	1e-05	0.99995	1e-05	1e-05	1e-05	1e-05	1e-05	0.99995
L. vulgaris	1260	Romania	Sighişoara	46.1918	24.756	1e-05	1e-05	0.010509	1e-05	1e-05	0.909456	1e-05	0.079975	1e-05	1e-05	1e-05	0.010509	1e-05	1e-05	0.989451	1e-05	1e-05	0.010509	1e-05	1e-05	0.989451
L. vulgaris	2075	Romania	Strâmba	47.2476	24.6531	1e-05	1e-05	1e-05	1e-05	1e-05	0.99992	1e-05	1e-05	1e-05	1e-05	1e-05	1e-05	1e-05	1e-05	0.99995	1e-05	1e-05	1e-05	1e-05	1e-05	0.99995
L. vulgaris	3053	Romania	Valea Ierii	46.6504	23.3554	1e-05	1e-05	1e-05	1e-05	1e-05	0.98667	1e-05	0.01326	1e-05	1e-05	1e-05	1e-05	1e-05	1e-05	0.99995	1e-05	1e-05	1e-05	1e-05	1e-05	0.99995
L. vulgaris	1250	Romania	Vilsanesti	45.1527	24.7928	1e-05	1e-05	0.049054	1e-05	0.029878	0.098651	1e-05	0.822367	1e-05	1e-05	1e-05	0.049054	1e-05	0.029878	0.921038	1e-05	1e-05	0.049054	1e-05	0.029878	0.921038
L. vulgaris	5616	Romania	Zeicani	45.506	22.709	1e-05	1e-05	1e-05	1e-05	1e-05	0.816433	1e-05	1e-05	0.183497	1e-05	1e-05	1e-05	1e-05	1e-05	0.99995	1e-05	1e-05	1e-05	1e-05	1e-05	0.99995
L. vulgaris	10628	Serbia	Banatsko Veliko Selo	45.827	20.594	1e-05	1e-05	1e-05	1e-05	1e-05	0.765756	1e-05	1e-05	0.234174	1e-05	1e-05	1e-05	1e-05	1e-05	0.99995	1e-05	1e-05	1e-05	1e-05	1e-05	0.99995
L. vulgaris	3386	Serbia	Blato	43.301	20.73	1e-05	1e-05	1e-05	1e-05	1e-05	0.014066	0.002446	1e-05	0.983428	1e-05	1e-05	1e-05	1e-05	1e-05	0.99995	1e-05	1e-05	1e-05	1e-05	1e-05	0.99995
L. vulgaris	10355	Serbia	Bujanovac	42.461	21.766	0.011525	1e-05	1e-05	1e-05	1.5e-05	1e-05	1e-05	1e-05	0.9884	0.011525	1e-05	1e-05	1e-05	1.5e-05	0.98843	0.011525	1e-05	1e-05	1e-05	1.5e-05	0.98843
L. vulgaris	10642	Serbia	Cvetanovačka Bara	44.468	22.445	1e-05	1e-05	1e-05	1e-05	1e-05	0.128454	0.018773	1e-05	0.852714	1e-05	1e-05	1e-05	1e-05	1e-05	0.999951	1e-05	1e-05	1e-05	1e-05	1e-05	0.999951
L. vulgaris	3639	Serbia	Djurinci1	44.512	20.632	1e-05	1e-05	1e-05	1e-05	1e-05	0.058056	1e-05	1e-05	0.941874	1e-05	1e-05	1e-05	1e-05	1e-05	0.99995	1e-05	1e-05	1e-05	1e-05	1e-05	0.99995
L. vulgaris	3640	Serbia	Djurinci2	44.494	20.653	1.2e-05	1e-05	1e-05	1e-05	1e-05	0.106164	1e-05	1e-05	0.893765	1.2e-05	1e-05	1e-05	1e-05	1e-05	0.999949	1.2e-05	1e-05	1e-05	1e-05	1e-05	0.999949
L. vulgaris	3694	Serbia	Duboka	44.569	21.766	0.002071	1e-05	1.9e-05	1e-05	1.1e-05	0.078981	1e-05	1e-05	0.918878	0.002071	1e-05	1.9e-05	1e-05	1.1e-05	0.997879	0.002071	1e-05	1.9e-05	1e-05	1.1e-05	0.997879
L. vulgaris	400	Serbia	Glušci	44.9944	19.7294	1e-05	1e-05	1e-05	1e-05	1e-05	1e-05	1e-05	1e-05	0.99992	1e-05	1e-05	1e-05	1e-05	1e-05	0.99995	1e-05	1e-05	1e-05	1e-05	1e-05	0.99995
L. vulgaris	429	Serbia	Gornja Šabanta	43.9558	20.9972	1e-05	1e-05	1e-05	1e-05	1e-05	0.025902	1e-05	1e-05	0.974028	1e-05	1e-05	1e-05	1e-05	1e-05	0.99995	1e-05	1e-05	1e-05	1e-05	1e-05	0.99995
L. vulgaris	3512	Serbia	Grza	43.897	21.646	1e-05	1e-05	0.011129	1e-05	1e-05	0.067908	1e-05	1e-05	0.920902	1e-05	1e-05	0.011129	1e-05	1e-05	0.98883	1e-05	1e-05	0.011129	1e-05	1e-05	0.98883
L. vulgaris	3582	Serbia	Jezero	43.89	21.901	1e-05	1e-05	1e-05	0.002173	1e-05	0.049118	1e-05	1e-05	0.948649	1e-05	1e-05	1e-05	0.002173	1e-05	0.997787	1e-05	1e-05	1e-05	0.002173	1e-05	0.997787
L. vulgaris	549	Serbia	Karan	43.8906	19.9339	1e-05	1e-05	1e-05	1e-05	1e-05	1e-05	0.016986	1e-05	0.982944	1e-05	1e-05	1e-05	1e-05	1e-05	0.99995	1e-05	1e-05	1e-05	1e-05	1e-05	0.99995
L. vulgaris	3495	Serbia	Kovacica	45.141	20.561	1e-05	1e-05	1e-05	1e-05	1e-05	0.709236	1e-05	1e-05	0.290694	1e-05	1e-05	1e-05	1e-05	1e-05	0.99995	1e-05	1e-05	1e-05	1e-05	1e-05	0.99995
L. vulgaris	3545	Serbia	Krivi Vir	43.801	21.761	1e-05	1e-05	1e-05	0.00389	1e-05	0.095522	0.018031	1e-05	0.882507	1e-05	1e-05	1e-05	0.00389	1e-05	0.99607	1e-05	1e-05	1e-05	0.00389	1e-05	0.99607
L. vulgaris	3377	Serbia	Ljuberadja	43.032	22.395	1e-05	1e-05	0.018935	1e-05	1e-05	1e-05	1e-05	1e-05	0.980995	1e-05	1e-05	0.018935	1e-05	1e-05	0.981025	1e-05	1e-05	0.018935	1e-05	1e-05	0.981025
L. vulgaris	3691	Serbia	Majdanpek	44.434	21.974	1e-05	1e-05	1e-05	1e-05	1e-05	0.152135	1e-05	1e-05	0.847795	1e-05	1e-05	1e-05	1e-05	1e-05	0.99995	1e-05	1e-05	1e-05	1e-05	1e-05	0.99995
L. vulgaris	10638	Serbia	Makova Sedmica	46.148	19.674	1e-05	1e-05	1e-05	1e-05	1e-05	0.066015	0.002092	1.5e-05	0.931827	1e-05	1e-05	1e-05	1e-05	1e-05	0.999949	1e-05	1e-05	1e-05	1e-05	1e-05	0.999949
L. vulgaris	10645	Serbia	Manastirica	44.621	22.5	1e-05	1e-05	1e-05	0.048655	1e-05	0.054479	1e-05	1e-05	0.896806	1e-05	1e-05	1e-05	0.048655	1e-05	0.951305	1e-05	1e-05	1e-05	0.048655	1e-05	0.951305
L. vulgaris	10557	Serbia	Markovo Kale	42.582	21.888	1e-05	1e-05	0.00783	1.3e-05	1e-05	1e-05	1.2e-05	1e-05	0.992095	1e-05	1e-05	0.00783	1.3e-05	1e-05	0.992127	1e-05	1e-05	0.00783	1.3e-05	1e-05	0.992127
L. vulgaris	3383	Serbia	Medjuhana	43.29	21.307	1e-05	1e-05	1e-05	1e-05	1e-05	0.007596	1e-05	1e-05	0.992334	1e-05	1e-05	1e-05	1e-05	1e-05	0.99995	1e-05	1e-05	1e-05	1e-05	1e-05	0.99995
L. vulgaris	10615	Serbia	Negotin	44.229	22.531	1e-05	1e-05	1e-05	0.036024	0.001888	0.116656	1e-05	0.012187	0.833205	1e-05	1e-05	1e-05	0.036024	0.001888	0.962058	1e-05	1e-05	1e-05	0.036024	0.001888	0.962058
L. vulgaris	3394	Serbia	Nova Varoš	43.43	19.828	1e-05	1e-05	1e-05	1e-05	1e-05	0.046828	1e-05	1e-05	0.953102	1e-05	1e-05	1e-05	1e-05	1e-05	0.99995	1e-05	1e-05	1e-05	1e-05	1e-05	0.99995
L. vulgaris	3487	Serbia	Opovo	45.061	20.436	1e-05	1e-05	1e-05	1e-05	1e-05	0.668657	1e-05	1e-05	0.331273	1e-05	1e-05	1e-05	1e-05	1e-05	0.99995	1e-05	1e-05	1e-05	1e-05	1e-05	0.99995
L. vulgaris	10671	Serbia	Oraovica	42.864	22.071	0.011321	1e-05	1.2e-05	1e-05	1e-05	1e-05	1e-05	1e-05	0.988607	0.011321	1e-05	1.2e-05	1e-05	1e-05	0.988637	0.011321	1e-05	1.2e-05	1e-05	1e-05	0.988637
L. vulgaris	10558	Serbia	Orid	44.712	19.797	1e-05	0.011343	1e-05	1e-05	1e-05	1e-05	1e-05	1e-05	0.988587	1e-05	0.011343	1e-05	1e-05	1e-05	0.988617	1e-05	0.011343	1e-05	1e-05	1e-05	0.988617
L. vulgaris	10679	Serbia	Paskovac	44.483	19.231	0.001952	1e-05	0.009963	0.104803	1e-05	0.023323	1e-05	1e-05	0.859918	0.001952	1e-05	0.009963	0.104803	1e-05	0.883261	0.001952	1e-05	0.009963	0.104803	1e-05	0.883261
L. vulgaris	3603	Serbia	Promaja	42.678	22.357	1.4e-05	1e-05	0.02355	0.008882	1e-05	1e-05	1e-05	1e-05	0.967503	1.4e-05	1e-05	0.02355	0.008882	1e-05	0.967533	1.4e-05	1e-05	0.02355	0.008882	1e-05	0.967533
L. vulgaris	3565	Serbia	Rtanj	43.772	21.932	1e-05	1e-05	1e-05	0.012932	1e-05	0.045316	1e-05	1e-05	0.941693	1e-05	1e-05	1e-05	0.012932	1e-05	0.987029	1e-05	1e-05	1e-05	0.012932	1e-05	0.987029
L. vulgaris	10672	Serbia	Selevenjske Pustare	46.147	19.906	1e-05	1e-05	0.008002	1e-05	1e-05	0.074548	0.002502	1e-05	0.914898	1e-05	1e-05	0.008002	1e-05	1e-05	0.991958	1e-05	1e-05	0.008002	1e-05	1e-05	0.991958
L. vulgaris	3580	Serbia	Sisevac	43.957	21.584	1e-05	1e-05	1.1e-05	1e-05	1e-05	0.076974	1.5e-05	1e-05	0.92295	1e-05	1e-05	1.1e-05	1e-05	1e-05	0.999949	1e-05	1e-05	1.1e-05	1e-05	1e-05	0.999949
L. vulgaris	10664	Serbia	Umka	44.681	20.32	1e-05	1e-05	1e-05	1e-05	1e-05	1e-05	0.040352	1e-05	0.959578	1e-05	1e-05	1e-05	1e-05	1e-05	0.99995	1e-05	1e-05	1e-05	1e-05	1e-05	0.99995
L. vulgaris	10677	Serbia	Vatin	45.23	21.244	1e-05	1e-05	1e-05	1e-05	1e-05	0.670945	1e-05	1e-05	0.328985	1e-05	1e-05	1e-05	1e-05	1e-05	0.99995	1e-05	1e-05	1e-05	1e-05	1e-05	0.99995
L. vulgaris	471	Serbia	Vlasi1	42.9986	22.6411	1e-05	1e-05	1e-05	1e-05	1e-05	1e-05	1e-05	1e-05	0.99992	1e-05	1e-05	1e-05	1e-05	1e-05	0.99995	1e-05	1e-05	1e-05	1e-05	1e-05	0.99995
L. vulgaris	3654	Serbia	Vlasi2	42.998	22.638	1e-05	1e-05	1e-05	1e-05	1e-05	1e-05	1e-05	1e-05	0.99992	1e-05	1e-05	1e-05	1e-05	1e-05	0.99995	1e-05	1e-05	1e-05	1e-05	1e-05	0.99995
L. vulgaris	3350	Serbia	Vrtovac	43.404	22.45	1e-05	1e-05	0.012406	1e-05	1e-05	0.013943	1e-05	1e-05	0.973591	1e-05	1e-05	0.012406	1e-05	1e-05	0.987554	1e-05	1e-05	0.012406	1e-05	1e-05	0.987554
L. vulgaris	3621	Serbia	Zli Dol	42.422	22.453	1e-05	1e-05	1.4e-05	1e-05	1e-05	1e-05	1.2e-05	1e-05	0.999913	1e-05	1e-05	1.4e-05	1e-05	1e-05	0.999945	1e-05	1e-05	1.4e-05	1e-05	1e-05	0.999945
L. vulgaris	3547	Serbia	Zlot	44.011	21.967	1e-05	1e-05	1e-05	1e-05	1e-05	0.112409	0.014602	1e-05	0.872929	1e-05	1e-05	1e-05	1e-05	1e-05	0.99995	1e-05	1e-05	1e-05	1e-05	1e-05	0.99995
L. vulgaris	10249	Slovakia	Bratislava-Dúbravka	48.197	17.0379	1e-05	1e-05	1e-05	1e-05	1e-05	1e-05	0.042458	1e-05	0.957472	1e-05	1e-05	1e-05	1e-05	1e-05	0.99995	1e-05	1e-05	1e-05	1e-05	1e-05	0.99995
L. vulgaris	2199	Slovakia	Lipníky	49.065	21.4238	1e-05	1e-05	1e-05	1e-05	1e-05	0.99992	1e-05	1e-05	1e-05	1e-05	1e-05	1e-05	1e-05	1e-05	0.99995	1e-05	1e-05	1e-05	1e-05	1e-05	0.99995
L. vulgaris	10256	Slovakia	NPR Šúr	48.2282	17.2055	1e-05	1e-05	1e-05	1e-05	1e-05	1e-05	1e-05	1e-05	0.99992	1e-05	1e-05	1e-05	1e-05	1e-05	0.99995	1e-05	1e-05	1e-05	1e-05	1e-05	0.99995
L. vulgaris	10261	Slovakia	Parížské močiare	47.8582	18.5095	1e-05	1e-05	1e-05	1e-05	1e-05	1e-05	1e-05	1e-05	0.99992	1e-05	1e-05	1e-05	1e-05	1e-05	0.99995	1e-05	1e-05	1e-05	1e-05	1e-05	0.99995
L. vulgaris	10254	Slovenia	Dragonje	45.4481	13.6765	1e-05	1e-05	1e-05	1e-05	1e-05	1e-05	0.99992	1e-05	1e-05	1e-05	1e-05	1e-05	1e-05	1e-05	0.99995	1e-05	1e-05	1e-05	1e-05	1e-05	0.99995
L. vulgaris	10815	Slovenia	Komen	45.8189	13.7501	1e-05	1e-05	1e-05	1e-05	1e-05	1e-05	0.934367	1e-05	0.065563	1e-05	1e-05	1e-05	1e-05	1e-05	0.99995	1e-05	1e-05	1e-05	1e-05	1e-05	0.99995
L. vulgaris	10382	Slovenia	Podstrmec	45.804	14.574	1e-05	1e-05	0.004698	1e-05	1e-05	0.025124	0.660676	1e-05	0.309452	1e-05	1e-05	0.004698	1e-05	1e-05	0.995262	1e-05	1e-05	0.004698	1e-05	1e-05	0.995262
L. vulgaris	10340	Slovenia	Radenci	46.644	16.04	1e-05	1e-05	1e-05	1e-05	1e-05	1e-05	0.081198	1e-05	0.918732	1e-05	1e-05	1e-05	1e-05	1e-05	0.99995	1e-05	1e-05	1e-05	1e-05	1e-05	0.99995
L. vulgaris	5327	Slowenia	Puče	45.4739	13.7197	1e-05	1e-05	1e-05	1e-05	1e-05	1e-05	0.99992	1e-05	1e-05	1e-05	1e-05	1e-05	1e-05	1e-05	0.99995	1e-05	1e-05	1e-05	1e-05	1e-05	0.99995
L. vulgaris	5336	Slowenia	Puče2	45.4817	13.7208	1e-05	1e-05	1e-05	1e-05	1e-05	1e-05	0.963875	1e-05	0.036055	1e-05	1e-05	1e-05	1e-05	1e-05	0.99995	1e-05	1e-05	1e-05	1e-05	1e-05	0.99995
L. vulgaris	5047	United Kingdom	Leicester	52.6333	-1.11667	1e-05	1e-05	1e-05	1e-05	1e-05	1e-05	0.103914	0.415408	0.480619	1e-05	1e-05	1e-05	1e-05	1e-05	0.999951	1e-05	1e-05	1e-05	1e-05	1e-05	0.999951
L. vulgaris	2687	Ukraine	Dertsen	48.3548	22.6497	1e-05	1e-05	1e-05	1.1e-05	1e-05	0.999919	1e-05	1e-05	1e-05	1e-05	1e-05	1e-05	1.1e-05	1e-05	0.999949	1e-05	1e-05	1e-05	1.1e-05	1e-05	0.999949
L. vulgaris	2792	Ukraine	Honcharivka	48.8658	25.0226	1e-05	1e-05	0.022851	1e-05	1e-05	1e-05	1e-05	0.977079	1e-05	1e-05	1e-05	0.022851	1e-05	1e-05	0.977109	1e-05	1e-05	0.022851	1e-05	1e-05	0.977109
L. vulgaris	10750	Ukraine	Kharkiv	50.0079	36.2685	1e-05	1e-05	1e-05	1e-05	1e-05	1e-05	1e-05	0.99992	1e-05	1e-05	1e-05	1e-05	1e-05	1e-05	0.99995	1e-05	1e-05	1e-05	1e-05	1e-05	0.99995
L. vulgaris	2699	Ukraine	Lypcha	48.279	23.3797	1e-05	1e-05	1e-05	1e-05	1e-05	0.99992	1e-05	1e-05	1e-05	1e-05	1e-05	1e-05	1e-05	1e-05	0.99995	1e-05	1e-05	1e-05	1e-05	1e-05	0.99995
L. vulgaris	2796	Ukraine	Lyucha	48.3819	24.905	1e-05	1e-05	1.4e-05	0.066491	1e-05	1e-05	1e-05	0.933435	1e-05	1e-05	1e-05	1.4e-05	0.066491	1e-05	0.933465	1e-05	1e-05	1.4e-05	0.066491	1e-05	0.933465
L. vulgaris	10743	Ukraine	Ruska Lozova	50.1668	36.3338	1e-05	1e-05	1e-05	1e-05	1e-05	1e-05	1e-05	0.99992	1e-05	1e-05	1e-05	1e-05	1e-05	1e-05	0.99995	1e-05	1e-05	1e-05	1e-05	1e-05	0.99995
L. vulgaris	10759	Ukraine	Vylkove	45.469	29.588	1e-05	1e-05	1e-05	1e-05	1e-05	1e-05	1e-05	0.556278	0.443652	1e-05	1e-05	1e-05	1e-05	1e-05	0.99995	1e-05	1e-05	1e-05	1e-05	1e-05	0.99995
genetically admixed	5464	Bulgaria	Bliznatsi	43.021	27.822	1e-05	1e-05	1e-05	1e-05	0.337085	0.00998	0.007808	0.586531	0.058556	1e-05	1e-05	1e-05	1e-05	0.337085	0.662875	1e-05	1e-05	1e-05	1e-05	0.337085	0.662875
genetically admixed	5465	Bulgaria	Novo Oryahovo	42.988	27.846	1e-05	0.015331	1e-05	1e-05	0.360687	0.061923	1e-05	0.559519	0.0025	1e-05	0.015331	1e-05	1e-05	0.360687	0.623952	1e-05	0.0119663	0.0304757	1e-05	0.397955	0.559584
genetically admixed	5488	Bulgaria	Novo Oryahovo	42.988	27.846	1e-05	0.014699	1e-05	1e-05	0.41342	0.028744	1e-05	0.500555	0.042542	1e-05	0.014699	1e-05	1e-05	0.41342	0.571851
genetically admixed	5489	Bulgaria	Novo Oryahovo	42.988	27.846	1e-05	0.005869	0.091407	1e-05	0.419757	0.021561	0.010832	0.450545	1e-05	1e-05	0.005869	0.091407	1e-05	0.419757	0.482948
genetically admixed	10517	Croatia	Metković	43.053	17.649	0.748402	1e-05	1e-05	1e-05	1e-05	1e-05	1e-05	1e-05	0.251528	0.748402	1e-05	1e-05	1e-05	1e-05	0.251558	0.748402	1e-05	1e-05	1e-05	1e-05	0.251558

## Sheet: Table S2
Table S2. Distribution database for the six species constituting the smooth newt species complex (Lissotriton vulgaris sensu lato and L. montandoni).
Species	Locality	Latitude	Longitude	Source	Accuracy	Elevation (m.a.s.l.)
Lissotriton graecus	Albania: Apollonia	40.7175	19.476	Personal database	GPS	16
Lissotriton graecus	Albania: Bejar	40.429	19.85	Personal database	GPS	153
Lissotriton graecus	Albania: Borsh	40.05	19.85	Personal database	GPS	12
Lissotriton graecus	Albania: Buzëliqen	40.6837	20.9972	Personal database	GPS	891
Lissotriton graecus	Albania: Cerrage	40.9253	19.8044	Personal database	GPS	84
Lissotriton graecus	Albania: Fushë-Krujë	41.529	19.682	Personal database	GPS	5
Lissotriton graecus	Albania: Fushë-Milot	41.6582	19.6729	Personal database	GPS	3
Lissotriton graecus	Albania: Gjirokastër	40.099	20.124	Personal database	GPS	206
Lissotriton graecus	Albania: Gjonce	40.5544	19.655	Personal database	GPS	23
Lissotriton graecus	Albania: Gracen	41.157	19.949	Personal database	GPS	609
Lissotriton graecus	Albania: Gryke Lugje	42.361	19.6332	Personal database	GPS	854
Lissotriton graecus	Albania: Gur i Zi	42.284	19.569	Personal database	GPS	1533
Lissotriton graecus	Albania: Kavajë	41.168	19.556	Personal database	GPS	14
Lissotriton graecus	Albania: Kolsh	42.072	20.326	Personal database	GPS	520
Lissotriton graecus	Albania: Laskovické jezero	40.1822	20.6486	Personal database	Google Earth	1017
Lissotriton graecus	Albania: Lukovë	39.9989	19.9079	Personal database	GPS	133
Lissotriton graecus	Albania: Lushnjë	41	19.664	Personal database	GPS	5
Lissotriton graecus	Albania: Memaliaj	40.3458	19.9624	Personal database	GPS	117
Lissotriton graecus	Albania: Mursi	39.6975	20.1035	Personal database	GPS	27
Lissotriton graecus	Albania: Myc-Has	42.1048	20.3529	Personal database	GPS	475
Lissotriton graecus	Albania: Orik	40.31	19.458	Personal database	GPS	-1
Lissotriton graecus	Albania: Rrashbull	41.3464	19.5064	Personal database	GPS	8
Lissotriton graecus	Albania: Senicë	40.0121	20.0094	Personal database	GPS	410
Lissotriton graecus	Albania: Shelegur-Gërmenj	40.1814	20.6744	Personal database	GPS	1321
Lissotriton graecus	Albania: Skodhër	42.071	19.503	Personal database	Google Earth	12
Lissotriton graecus	Albania: Sopik	39.782	20.07	Personal database	GPS	134
Lissotriton graecus	Albania: Steblevë	41.3353	20.4767	Personal database	GPS	1243
Lissotriton graecus	Albania: Syri i Kaltër	39.9194	20.1852	Personal database	GPS	156
Lissotriton graecus	Albania: Trebeshine Mts.	40.3532	20.0937	Personal database	GPS	1842
Lissotriton graecus	Albania: Vagalat	39.7401	20.1321	Personal database	GPS	77
Lissotriton graecus	Albania: Jablonski001	40.3063	19.8391	Personal database	GPS	1641
Lissotriton graecus	Albania: Jablonski002	39.9194	20.1852	Personal database	GPS	156
Lissotriton graecus	Albania: Jablonski003	41.3252	20.4457	Personal database	GPS	1258
Lissotriton graecus	Albania: Jablonski004	41.6809	20.3385	Personal database	GPS	383
Lissotriton graecus	Albania: Jablonski005	40.7209	20.8817	Personal database	GPS	826
Lissotriton graecus	Albania: Jablonski006	40.2953	20.6271	Personal database	GPS	1008
Lissotriton graecus	Albania: Jablonski007	40.1961	20.1839	Personal database	GPS	1327
Lissotriton graecus	Albania: Jablonski008	40.1851	20.1826	Personal database	GPS	1340
Lissotriton graecus	Albania: Jablonski009	40.7285	20.8512	Personal database	GPS	820
Lissotriton graecus	Albania: Jablonski010	40.6246	20.1941	Personal database	GPS	1386
Lissotriton graecus	Albania: Jablonski011	40.3731	19.3849	Personal database	GPS	582
Lissotriton graecus	Albania: Jablonski012	40.218	19.5739	Personal database	GPS	798
Lissotriton graecus	Albania: Jablonski013	40.5048	19.4667	Personal database	GPS	39
Lissotriton graecus	Albania: Jablonski014	41.3089	19.8128	Personal database	GPS	104
Lissotriton graecus	Albania: Jablonski015	40.361	19.6269	Personal database	GPS	150
Lissotriton graecus	Albania: Jablonski016	40.5179	19.4066	Personal database	GPS	-3
Lissotriton graecus	Albania: Jablonski017	40.5048	19.4161	Personal database	GPS	3
Lissotriton graecus	Albania: Jablonski018	40.7594	19.9891	Personal database	GPS	250
Lissotriton graecus	Albania: Jablonski019	40.5824	20.0316	Personal database	GPS	691
Lissotriton graecus	Bosnia and Herzegovina: Chadžibegova Kula	42.9509	17.8031	Personal database	GPS	344
Lissotriton graecus	Bosnia and Herzegovina: Domanovići	43.1336	17.8026	Personal database	GPS	186
Lissotriton graecus	Bosnia and Herzegovina: Moševići	42.9327	17.6842	Personal database	GPS	245
Lissotriton graecus	Bosnia and Herzegovina: Berkovići	43.121	18.072	IBISS	Google Earth	723
Lissotriton graecus	Bosnia and Herzegovina: Turica, Trebinje	42.831	18.149	IBISS	Google Earth	1125
Lissotriton graecus	Bosnia and Herzegovina: Svitava	43	17.8	Çördük et al. (2017)	Literature	257
Lissotriton graecus	Bulgaria: Belasitsa	41.3775	23.1568	Personal database	GPS	245
Lissotriton graecus	Bulgaria: Gabrene 1	41.3629	22.9716	Personal database	GPS	472
Lissotriton graecus	Bulgaria: Gabrene 2	41.3837	22.9779	Personal database	GPS	233
Lissotriton graecus	Bulgaria: General Todorov	41.4565	23.2697	Personal database	GPS	93
Lissotriton graecus	Bulgaria: Katuntsi	41.4344	23.4218	Personal database	GPS	188
Lissotriton graecus	Bulgaria: Kladentsi	41.414	23.0289	Personal database	GPS	413
Lissotriton graecus	Bulgaria: Kolarovo	41.3549	23.1257	Personal database	GPS	649
Lissotriton graecus	Bulgaria: Parvomay	41.4098	23.1377	Personal database	GPS	141
Lissotriton graecus	Bulgaria: Parvomay	41.403	23.1233	Personal database	GPS	177
Lissotriton graecus	Bulgaria: Parvomay 3	41.4019	23.117	Personal database	GPS	177
Lissotriton graecus	Bulgaria: Petrich	41.382	23.2073	Personal database	GPS	374
Lissotriton graecus	Bulgaria: Samuilovo 1	41.37	23.0794	Personal database	GPS	309
Lissotriton graecus	Bulgaria: Samuilovo 2	41.3974	23.0991	Personal database	GPS	151
Lissotriton graecus	Bulgaria: Strumeshnitsa	41.4083	23.0361	Personal database	GPS	284
Lissotriton graecus	Bulgaria: Yavornitsa	41.3603	23.0392	Personal database	GPS	464
Lissotriton graecus	Bulgaria: Marikostinovo	41.4288	23.3214	Beshkov (2015)	Google Earth	78
Lissotriton graecus	Bulgaria: Levunovo	41.4856	23.2704	Obst & Geissler (1982)	Google Earth	121
Lissotriton graecus	Bulgaria: IBW 5742	41.458	23.2622	Stoyneva & Michev (2007)	Google Earth	86
Lissotriton graecus	Croatia: Majkovi	42.773	17.911	Personal database	GPS	222
Lissotriton graecus	Greece: Acharavi	39.7892	19.8195	Personal database	Google Earth	19
Lissotriton graecus	Greece: Ano Pedina	39.8634	20.709	Personal database	GPS	832
Lissotriton graecus	Greece: Archangelos	41.087	22.3002	Personal database	GPS	854
Lissotriton graecus	Greece: Archangelos2	41.0495	22.291	Personal database	GPS	1032
Lissotriton graecus	Greece: Archontochori	38.697	21.0393	Personal database	GPS	396
Lissotriton graecus	Greece: Asparangeloi	39.8301	20.7299	Personal database	GPS	941
Lissotriton graecus	Greece: Efkarpia	41.0519	22.8984	Personal database	GPS	249
Lissotriton graecus	Greece: Girtoni	39.7355	22.4696	Personal database	GPS	63
Lissotriton graecus	Greece: Kalavryta	38.0273	22.0455	Personal database	GPS	836
Lissotriton graecus	Greece: Kalogria_C	38.1455	21.3834	Personal database	GPS	9
Lissotriton graecus	Greece: Kentriko	41.1603	22.8925	Personal database	GPS	356
Lissotriton graecus	Greece: Kerkini	41.2213	23.0942	Personal database	GPS	34
Lissotriton graecus	Greece: Kerkyra_C	39.6442	19.8277	Personal database	GPS	57
Lissotriton graecus	Greece: Kerkyra1_C	39.684	19.7637	Personal database	GPS	91
Lissotriton graecus	Greece: Kleisoura	39.3624	20.8866	Personal database	GPS	166
Lissotriton graecus	Greece: Lapas	38.1115	21.4099	Personal database	GPS	4
Lissotriton graecus	Greece: Lesini_C	38.4741	21.2077	Personal database	GPS	9
Lissotriton graecus	Greece: Mesongí	39.4772	19.9113	Personal database	GPS	11
Lissotriton graecus	Greece: Messinia_M	37.2687	21.9694	Personal database	GPS	78
Lissotriton graecus	Greece: Milia	37.5958	22.4087	Personal database	GPS	634
Lissotriton graecus	Greece: Omalo	40.8921	22.4128	Personal database	GPS	360
Lissotriton graecus	Greece: Paliambela	38.9087	20.97	Personal database	GPS	77
Lissotriton graecus	Greece: Pefkodasos	41.03	22.5801	Personal database	GPS	152
Lissotriton graecus	Greece: Pythio	40.0889	22.208	Personal database	GPS	839
Lissotriton graecus	Greece: Sagaiika	38.1041	21.4691	Personal database	GPS	27
Lissotriton graecus	Greece: Seli	40.5675	22.0222	Personal database	GPS	1475
Lissotriton graecus	Greece: Soluň	40.6403	22.9439	Personal database	Google Earth	25
Lissotriton graecus	Greece: Thavmako	39.145	22.2763	Personal database	GPS	253
Lissotriton graecus	Greece: Trilofos	40.3575	22.4766	Personal database	GPS	181
Lissotriton graecus	Greece: Vasiliki_C	38.6278	20.6111	Personal database	GPS	23
Lissotriton graecus	Greece: Vatos	39.6	19.8	Personal database	Google Earth	99
Lissotriton graecus	Greece: Zevgolateis	37.2535	21.9776	Personal database	GPS	73
Lissotriton graecus	Greece: 001	39.75	20.766	Personal database	GPS	462
Lissotriton graecus	Greece: 002	39.6142	20.8437	Personal database	GPS	483
Lissotriton graecus	Greece: 003	39.6938	20.8492	Personal database	GPS	511
Lissotriton graecus	Greece: 004	39.6305	20.8528	Personal database	GPS	476
Lissotriton graecus	Greece: 005	39.5574	20.8666	Personal database	GPS	488
Lissotriton graecus	Greece: 006	39.5408	20.867	Personal database	GPS	491
Lissotriton graecus	Greece: 007	39.6327	20.9004	Personal database	GPS	470
Lissotriton graecus	Greece: 008	39.6325	20.9014	Personal database	GPS	470
Lissotriton graecus	Greece: 009	39.8227	21.3474	Personal database	GPS	927
Lissotriton graecus	Greece: 010	40.1034	21.3558	Personal database	GPS	606
Lissotriton graecus	Greece: 011	39.848	21.361	Personal database	GPS	1031
Lissotriton graecus	Greece: 012	40.6453	21.4765	Personal database	GPS	1444
Lissotriton graecus	Greece: 013	40.6452	21.4767	Personal database	GPS	1444
Lissotriton graecus	Greece: 014	39.9706	21.5244	Personal database	GPS	876
Lissotriton graecus	Greece: 015	39.9703	21.5247	Personal database	GPS	804
Lissotriton graecus	Greece: 016	40.816	21.8992	Personal database	GPS	576
Lissotriton graecus	Greece: 017	40.6291	22.0265	Personal database	GPS	729
Lissotriton graecus	Greece: 018	38.0065	22.0574	Personal database	GPS	779
Lissotriton graecus	Greece: 019	41.0239	22.2748	Personal database	GPS	1224
Lissotriton graecus	Greece: Ano Kalliniki	40.8667	21.45	Çördük et al. (2017)	Literature	606
Lissotriton graecus	Greece: Bergina	40.4833	22.3167	Çördük et al. (2017)	Literature	152
Lissotriton graecus	Greece: Kato Pedina	39.9	20.6667	Çördük et al. (2017)	Literature	921
Lissotriton graecus	Greece: Lake Prespa	40.8333	21.1	Çördük et al. (2017)	Literature	850
Lissotriton graecus	Greece: Nestani	37.6167	22.45	Çördük et al. (2017)	Literature	626
Lissotriton graecus	Greece: 34SDH4	38.1735	20.7153	Sillero et al. (2014)	Center grid	273
Lissotriton graecus	Greece: 34SEF3	36.8188	21.8416	Sillero et al. (2014)	Center grid	193
Lissotriton graecus	Greece: 34SEJ2	39.0746	21.2897	Sillero et al. (2014)	Center grid	765
Lissotriton graecus	Greece: 34SEJ4	39.0717	21.8677	Sillero et al. (2014)	Center grid	971
Lissotriton graecus	Greece: 34SFG3	37.7064	22.9858	Sillero et al. (2014)	Center grid	952
Lissotriton graecus	Greece: 34SFG4	37.256	22.974	Sillero et al. (2014)	Center grid	n/a
Lissotriton graecus	Greece: 34SFH1	38.6156	22.4364	Sillero et al. (2014)	Center grid	1649
Lissotriton graecus	Greece: 34TFK3	40.4081	23.063	Sillero et al. (2014)	Center grid	171
Lissotriton graecus	Kosovo: Vrbnica	42.1563	20.5485	IBISS	Google Earth	341
Lissotriton graecus	Macedonia: Debreste	41.502	21.293	Personal database	GPS	870
Lissotriton graecus	Macedonia: Drugovo	41.4131	20.8151	Personal database	GPS	898
Lissotriton graecus	Macedonia: Garnikovo1	41.2771	22.0602	Personal database	GPS	906
Lissotriton graecus	Macedonia: Garnikovo2	41.267	22.0533	Personal database	GPS	925
Lissotriton graecus	Macedonia: Gorno Srpci	41.072	21.219	Personal database	GPS	920
Lissotriton graecus	Macedonia: Gostivar	41.817	20.899	Personal database	GPS	545
Lissotriton graecus	Macedonia: Izvor	41.521	21.71	Personal database	GPS	324
Lissotriton graecus	Macedonia: Kolibari	41.58	20.951	Personal database	GPS	689
Lissotriton graecus	Macedonia: Lera	41.101	21.168	Personal database	GPS	736
Lissotriton graecus	Macedonia: Leskoec	40.962	20.885	Personal database	GPS	1045
Lissotriton graecus	Macedonia: Loznani	41.221	21.446	Personal database	GPS	586
Lissotriton graecus	Macedonia: R’zanicino	41.914	21.643	Personal database	GPS	237
Lissotriton graecus	Macedonia: Suvodol	41.5063	21.2742	Personal database	GPS	874
Lissotriton graecus	Macedonia: Dojran	41.244	22.691	IBISS	Google Earth	264
Lissotriton graecus	Macedonia: Galičica	40.964	20.833	IBISS	Google Earth	1839
Lissotriton graecus	Macedonia: Misleševo	41.187	20.718	IBISS	Google Earth	700
Lissotriton graecus	Macedonia: Rašče, Skoplje	42.021	21.247	IBISS	Google Earth	358
Lissotriton graecus	Macedonia: Skoplje	41.997	21.428	IBISS	Google Earth	250
Lissotriton graecus	Macedonia: Streževo, Bitolj	41.137	21.17	IBISS	Google Earth	726
Lissotriton graecus	Macedonia: Strumica	41.438	22.643	IBISS	Google Earth	229
Lissotriton graecus	Montenegro: Ada Bojana	41.862	19.36	Personal database	Google Earth	5
Lissotriton graecus	Montenegro: Bjeloši1	42.368	18.888	Personal database	GPS	1136
Lissotriton graecus	Montenegro: Bjeloši2	42.374	18.907	Personal database	GPS	848
Lissotriton graecus	Montenegro: Buljarica	42.1986	18.9653	Personal database	Google Earth	3
Lissotriton graecus	Montenegro: Debeli Brijeg	42.476	18.464	Personal database	GPS	50
Lissotriton graecus	Montenegro: Donji Stoj	41.8783	19.3673	Personal database	GPS	1
Lissotriton graecus	Montenegro: Kostanjica	42.0888	19.2632	Personal database	GPS	325
Lissotriton graecus	Montenegro: Tivat	42.3966	18.7389	Personal database	GPS	11
Lissotriton graecus	Montenegro: Ulcinj	41.9276	19.2334	Personal database	GPS	9
Lissotriton graecus	Montenegro: Balješina lokva	42.5536	18.5349	IBISS	Google Earth	1415
Lissotriton graecus	Montenegro: Blizanci, Danilovgrad	42.5197	19.0297	IBISS	GPS	600
Lissotriton graecus	Montenegro: Bojanje Brdo	42.5625	18.8216	IBISS	Google Earth	864
Lissotriton graecus	Montenegro: Ćetkova kamenica	42.7347	18.599	IBISS	GPS	847
Lissotriton graecus	Montenegro: Čevo	42.5461	18.9211	IBISS	GPS	754
Lissotriton graecus	Montenegro: Cicmanovica	42.5146	19.0366	IBISS	GPS	619
Lissotriton graecus	Montenegro: Dobrsko selo	42.378	18.964	IBISS	Google Earth	374
Lissotriton graecus	Montenegro: Dolovi	42.9043	18.6232	IBISS	GPS	1098
Lissotriton graecus	Montenegro: Donji Murići	42.1577	19.2136	IBISS	Google Earth	198
Lissotriton graecus	Montenegro: Donji Štoj	41.8996	19.3294	IBISS	GPS	2
Lissotriton graecus	Montenegro: Erakovice	42.5371	19.0354	IBISS	GPS	1153
Lissotriton graecus	Montenegro: Garač Mt.	42.45	19.1	IBISS	Google Earth	425
Lissotriton graecus	Montenegro: Gornja Briska	42.1156	19.2223	IBISS	GPS	446
Lissotriton graecus	Montenegro: Gornja Trepča	42.8286	18.7667	IBISS	Google Earth	809
Lissotriton graecus	Montenegro: Gornji Ceklin	42.3586	18.9814	IBISS	Google Earth	273
Lissotriton graecus	Montenegro: Građevina, Osječenica	42.6876	18.6411	IBISS	GPS	979
Lissotriton graecus	Montenegro: Jankovići	42.3765	19.028	IBISS	Google Earth	499
Lissotriton graecus	Montenegro: Kadaruša	42.4261	18.8822	IBISS	Google Earth	912
Lissotriton graecus	Montenegro: Kosić	42.5392	19.1428	IBISS	GPS	48
Lissotriton graecus	Montenegro: Koštanjica	42.0888	19.2632	IBISS	GPS	325
Lissotriton graecus	Montenegro: Kovačevića lokva	42.7271	18.6119	IBISS	GPS	915
Lissotriton graecus	Montenegro: Kruševice, Lokanj	42.535	18.4951	IBISS	Google Earth	739
Lissotriton graecus	Montenegro: Kućišta, Cetinje	42.463	18.862	IBISS	Google Earth	821
Lissotriton graecus	Montenegro: Lasor	42.3741	18.9074	IBISS	GPS	848
Lissotriton graecus	Montenegro: Lješevici	42.373	18.7214	IBISS	Google Earth	194
Lissotriton graecus	Montenegro: Lovćen - Jezero	42.405	18.8368	IBISS	GPS	1380
Lissotriton graecus	Montenegro: Markovina	42.5425	19.0086	IBISS	GPS	913
Lissotriton graecus	Montenegro: Meka lokva, Rokoče	42.6681	18.7462	IBISS	GPS	1060
Lissotriton graecus	Montenegro: Milojevići - Ubao Grabovica	42.632	18.9977	IBISS	GPS	491
Lissotriton graecus	Montenegro: Milojevići - Ubao Mrainjac	42.633	18.9918	IBISS	GPS	491
Lissotriton graecus	Montenegro: Mrčevo Polje, Budva	42.293	18.799	IBISS	Google Earth	0
Lissotriton graecus	Montenegro: Orahovo	42.243	19.0624	IBISS	Google Earth	13
Lissotriton graecus	Montenegro: Pilatovci	42.8542	18.5079	IBISS	GPS	929
Lissotriton graecus	Montenegro: Progonovići	42.4302	19.0558	IBISS	GPS	378
Lissotriton graecus	Montenegro: Razvuđska Kamenica	42.6921	18.7226	IBISS	GPS	1030
Lissotriton graecus	Montenegro: Resna, Cetinje	42.4956	18.8793	IBISS	GPS	776
Lissotriton graecus	Montenegro: Rutešića voda	42.7397	18.6243	IBISS	GPS	900
Lissotriton graecus	Montenegro: Ržani Do	42.5145	18.8347	IBISS	GPS	597
Lissotriton graecus	Montenegro: Spila	42.7254	18.6301	IBISS	Google Earth	865
Lissotriton graecus	Montenegro: Sunjava	42.5206	18.6425	IBISS	GPS	790
Lissotriton graecus	Montenegro: Sutorina	42.499	18.463	IBISS	Google Earth	543
Lissotriton graecus	Montenegro: Sutorman	42.1542	19.0839	IBISS	Google Earth	1102
Lissotriton graecus	Montenegro: Trnjine selo	42.558	18.856	IBISS	Google Earth	682
Lissotriton graecus	Montenegro: Velika Osječenica	42.7047	18.6336	IBISS	GPS	1041
Lissotriton graecus	Montenegro: Vilusi	42.728	18.593	IBISS	Google Earth	892
Lissotriton graecus	Montenegro: Vodine	42.5288	19.0331	IBISS	GPS	682
Lissotriton graecus	Montenegro: Vojova kamenica	42.455	19.1427	IBISS	GPS	248
Lissotriton graecus	Montenegro: Voluje Oko	42.7153	18.6564	IBISS	GPS	949
Lissotriton graecus	Montenegro: Babljak	42.7021	18.6167	IBISS	GPS	1010
Lissotriton graecus	Montenegro: Baluna	42.7241	18.6146	IBISS	GPS	1024
Lissotriton graecus	Montenegro: Barina	42.6894	18.6373	IBISS	GPS	979
Lissotriton graecus	Montenegro: Bijele Poljane, Lokanj	42.689	18.8574	IBISS	GPS	986
Lissotriton graecus	Montenegro: Bijele Poljane, lokve	42.6853	18.8732	IBISS	GPS	1036
Lissotriton graecus	Montenegro: Bojanje Brdo, Ublina	42.6626	18.6117	IBISS	GPS	894
Lissotriton graecus	Montenegro: Brežine	42.3888	19.1123	IBISS	GPS	214
Lissotriton graecus	Montenegro: Broćanac Nikšićki	42.727	18.8561	IBISS	GPS	719
Lissotriton graecus	Montenegro: Bunar	42.6959	18.6373	IBISS	GPS	1116
Lissotriton graecus	Montenegro: Ćeklići	42.4603	18.8679	IBISS	GPS	976
Lissotriton graecus	Montenegro: Ceklin	42.3671	18.9819	IBISS	GPS	307
Lissotriton graecus	Montenegro: Čelina, Osoje	42.5466	18.8168	IBISS	GPS	697
Lissotriton graecus	Montenegro: Čelina1	42.3887	19.1208	IBISS	GPS	187
Lissotriton graecus	Montenegro: Čelina2	42.541	18.8237	IBISS	GPS	653
Lissotriton graecus	Montenegro: Cerova-Lokva	42.7274	18.5768	IBISS	GPS	981
Lissotriton graecus	Montenegro: Crna Korita	42.4598	18.8539	IBISS	GPS	848
Lissotriton graecus	Montenegro: Dobrska Župa	42.3868	19.0601	IBISS	GPS	220
Lissotriton graecus	Montenegro: Dolovi, Nova voda	42.861	18.5232	IBISS	GPS	1042
Lissotriton graecus	Montenegro: Donji Izvor	42.6104	18.7676	IBISS	GPS	919
Lissotriton graecus	Montenegro: Donji Zagarač	42.5044	19.0933	IBISS	GPS	114
Lissotriton graecus	Montenegro: Drazevina	42.4302	19.1454	IBISS	GPS	309
Lissotriton graecus	Montenegro: Drazevina village	42.4318	19.1429	IBISS	GPS	309
Lissotriton graecus	Montenegro: Drpe, Kadaruša	42.7861	18.5662	IBISS	GPS	824
Lissotriton graecus	Montenegro: Država	42.3698	18.9034	IBISS	GPS	848
Lissotriton graecus	Montenegro: Gornji Izvor	42.6048	18.7781	IBISS	GPS	818
Lissotriton graecus	Montenegro: Gornji Zagarač	42.5342	19.0428	IBISS	GPS	1089
Lissotriton graecus	Montenegro: Grab, Grab	42.5321	18.8272	IBISS	GPS	715
Lissotriton graecus	Montenegro: Grab, Trn	42.5331	18.8236	IBISS	GPS	616
Lissotriton graecus	Montenegro: Gradjevina Vučetića	42.7063	18.6034	IBISS	GPS	1035
Lissotriton graecus	Montenegro: Grahovac	42.6784	18.6176	IBISS	GPS	939
Lissotriton graecus	Montenegro: Grlačke kamenice	42.5047	19.0349	IBISS	GPS	660
Lissotriton graecus	Montenegro: Grubojeva lokva	42.7953	18.5104	IBISS	GPS	758
Lissotriton graecus	Montenegro: Jabuka	42.6914	18.7115	IBISS	GPS	1145
Lissotriton graecus	Montenegro: Kamenica Obodina	42.7742	18.523	IBISS	GPS	719
Lissotriton graecus	Montenegro: Kamenica Sozina	42.7972	18.4959	IBISS	GPS	685
Lissotriton graecus	Montenegro: Kašice	42.3841	19.0295	IBISS	GPS	453
Lissotriton graecus	Montenegro: Kešeljev bovan	42.7507	18.5948	IBISS	GPS	843
Lissotriton graecus	Montenegro: Komani-Smrdan	42.4447	19.1663	IBISS	GPS	201
Lissotriton graecus	Montenegro: Livari	42.1245	19.2237	IBISS	GPS	442
Lissotriton graecus	Montenegro: Lokva Ledenica	42.5381	18.7103	IBISS	GPS	749
Lissotriton graecus	Montenegro: Milovići, Rudnjača	42.832	18.6208	IBISS	GPS	776
Lissotriton graecus	Montenegro: Ožegovice	42.5608	18.898	IBISS	GPS	872
Lissotriton graecus	Montenegro: Ramuševići	42.0885	19.3002	IBISS	GPS	207
Lissotriton graecus	Montenegro: Rujišta	42.5152	19.0295	IBISS	GPS	619
Lissotriton graecus	Montenegro: Ržani Do, Antera	42.5264	18.8242	IBISS	GPS	616
Lissotriton graecus	Montenegro: Ržani Do, Cape	42.5171	18.836	IBISS	GPS	730
Lissotriton graecus	Montenegro: Ubao Bučevac	42.6085	19.0204	IBISS	GPS	470
Lissotriton graecus	Montenegro: Ubao Kladenac	42.6122	19.0151	IBISS	GPS	471
Lissotriton graecus	Montenegro: Ubao Suva lokva	42.7599	18.5726	IBISS	GPS	781
Lissotriton graecus	Montenegro: Ublica	42.4578	19.1322	IBISS	GPS	355
Lissotriton graecus	Montenegro: Ublovi	42.6138	18.8742	IBISS	GPS	796
Lissotriton graecus	Montenegro: Vladikina voda	42.8142	18.6321	IBISS	GPS	818
Lissotriton graecus	Montenegro: Vučji Do, Albijanića lokva	42.8882	18.5253	IBISS	GPS	1108
Lissotriton kosswigi	Turkey: Demirbey3	40.8495	30.4935	Personal database	GPS	25
Lissotriton kosswigi	Turkey: Denizli2	40.8932	29.5643	Personal database	GPS	228
Lissotriton kosswigi	Turkey: Karasu3	41.1163	30.6501	Personal database	GPS	4
Lissotriton kosswigi	Turkey: Kuyumculu	41.0574	30.7886	Personal database	GPS	13
Lissotriton kosswigi	Turkey: Mollafeneri2	40.8931	29.5076	Personal database	GPS	217
Lissotriton kosswigi	Turkey: Tekeköy	41.076	29.658	Personal database	GPS	143
Lissotriton kosswigi	Turkey: Yalnizçam	41.3333	31.65	Personal database	Google Earth	462
Lissotriton kosswigi	Turkey: Ağva	40.9025	29.6453	Wielstra et al. (2015)	GPS	333
Lissotriton kosswigi	Turkey: Alibahadır Köyü	41.187	29.205	Wielstra et al. (2015)	GPS	11
Lissotriton kosswigi	Turkey: Anadolu Çayırı	41.082	29.067	Wielstra et al. (2015)	Google Earth	27
Lissotriton kosswigi	Turkey: Anadolu Yakasi	40.993	29.038	Wielstra et al. (2015)	Google Earth	32
Lissotriton kosswigi	Turkey: Arifiye	40.703	30.38	Wielstra et al. (2015)	Google Earth	39
Lissotriton kosswigi	Turkey: Beykoz	41.143	29.178	Wielstra et al. (2015)	Google Earth	136
Lissotriton kosswigi	Turkey: Çaykuma	41.439	32.08	Wielstra et al. (2015)	Google Earth	24
Lissotriton kosswigi	Turkey: Dalca	41.01	30.107	Wielstra et al. (2015)	Google Earth	196
Lissotriton kosswigi	Turkey: Demirbey	40.86	30.491	Wielstra et al. (2015)	GPS	42
Lissotriton kosswigi	Turkey: Demirbey Köy	40.85	30.489	Wielstra et al. (2015)	GPS	23
Lissotriton kosswigi	Turkey: Denizli	40.898	29.555	Wielstra et al. (2015)	GPS	228
Lissotriton kosswigi	Turkey: Düzce	40.85	31.134	Wielstra et al. (2015)	Google Earth	140
Lissotriton kosswigi	Turkey: Esentepe	40.74	30.33	Wielstra et al. (2015)	Google Earth	177
Lissotriton kosswigi	Turkey: Fatih Sultan Meh	40.716	30.106	Wielstra et al. (2015)	Google Earth	35
Lissotriton kosswigi	Turkey: Hacılar	41.495	32.0886	Wielstra et al. (2015)	GPS	15
Lissotriton kosswigi	Turkey: Ihsaniye	41.119	30.647	Wielstra et al. (2015)	GPS	4
Lissotriton kosswigi	Turkey: Kandıra	41.069	30.161	Wielstra et al. (2015)	Google Earth	31
Lissotriton kosswigi	Turkey: Kanlıca	41.1	29.068	Wielstra et al. (2015)	Google Earth	26
Lissotriton kosswigi	Turkey: Karaburun	41.071	31.004	Wielstra et al. (2015)	GPS	12
Lissotriton kosswigi	Turkey: Karadeniz Ereğlisi	41.278	31.443	Wielstra et al. (2015)	Google Earth	159
Lissotriton kosswigi	Turkey: Karakoç	41.49	32.148	Wielstra et al. (2015)	GPS	25
Lissotriton kosswigi	Turkey: Karasu	41.083	30.762	Wielstra et al. (2015)	GPS	2
Lissotriton kosswigi	Turkey: Karasu	41.094	30.704	Wielstra et al. (2015)	Google Earth	2
Lissotriton kosswigi	Turkey: Kavacık	41.094	29.094	Wielstra et al. (2015)	Google Earth	125
Lissotriton kosswigi	Turkey: Kocaeli	40.75	30.051	Wielstra et al. (2015)	GPS	20
Lissotriton kosswigi	Turkey: Küçüksu	41.072	29.068	Wielstra et al. (2015)	Google Earth	13
Lissotriton kosswigi	Turkey: Kurbağaderesi	41.087	29.138	Wielstra et al. (2015)	Google Earth	77
Lissotriton kosswigi	Turkey: Lake Abant [type locality]	40.606	31.274	Wielstra et al. (2015)	Google Earth	1329
Lissotriton kosswigi	Turkey: Lake Abant 2	40.62	31.3	Wielstra et al. (2015)	Google Earth	1272
Lissotriton kosswigi	Turkey: Mollafeneri	40.894	29.507	Wielstra et al. (2015)	GPS	217
Lissotriton kosswigi	Turkey: Nehirkent	40.715	30.413	Wielstra et al. (2015)	GPS	36
Lissotriton kosswigi	Turkey: Ormanköy	40.796	30.74	Wielstra et al. (2015)	Google Earth	166
Lissotriton kosswigi	Turkey: Paşaköy	41.023	29.272	Wielstra et al. (2015)	GPS	89
Lissotriton kosswigi	Turkey: Poyrazlar Gölü	40.834	30.473	Wielstra et al. (2015)	Google Earth	28
Lissotriton kosswigi	Turkey: Şaziye	40.85	31.048	Wielstra et al. (2015)	Google Earth	128
Lissotriton kosswigi	Turkey: Sazlıdere	41.111	29.096	Wielstra et al. (2015)	Google Earth	66
Lissotriton kosswigi	Turkey: Şile	41.169	29.616	Wielstra et al. (2015)	Google Earth	81
Lissotriton kosswigi	Turkey: Yeni Sanayi Sitesi	40.75	30.415	Wielstra et al. (2015)	Google Earth	31
Lissotriton kosswigi	Turkey: "Locality 1"	40.775	30.415	Wielstra et al. (2015)	Digitized map	n/a
Lissotriton kosswigi	Turkey: "Locality 10"	40.874	30.999	Wielstra et al. (2015)	Digitized map	n/a
Lissotriton kosswigi	Turkey: "Locality 12"	41.12	31.363	Wielstra et al. (2015)	Digitized map	n/a
Lissotriton kosswigi	Turkey: "Locality 18"	41.553	32.26	Wielstra et al. (2015)	Digitized map	n/a
Lissotriton kosswigi	Turkey: "Locality 23"	40.717	31.476	Wielstra et al. (2015)	Digitized map	n/a
Lissotriton kosswigi	Turkey: "Locality 27"	40.789	30.533	Wielstra et al. (2015)	Digitized map	n/a
Lissotriton kosswigi	Turkey: "Locality 28"	40.788	30.566	Wielstra et al. (2015)	Digitized map	n/a
Lissotriton kosswigi	Turkey: "Locality 7"	40.876	30.623	Wielstra et al. (2015)	Digitized map	n/a
Lissotriton kosswigi	Turkey: "Locality 8"	40.864	30.692	Wielstra et al. (2015)	Digitized map	n/a
Lissotriton kosswigi	Turkey: "Locality 9"	40.838	30.691	Wielstra et al. (2015)	Digitized map	n/a
Lissotriton lantzi	Armenia: Stepanovan Town	41	44.3833	Skorinov et al. (2014)	Literature	1428
Lissotriton lantzi	Armenia: Urasar village	41.0167	44.2333	Skorinov et al. (2014)	Literature	1728
Lissotriton lantzi	Azerbaijan: Altyagach village	40.85	48.9167	Skorinov et al. (2014)	Literature	1121
Lissotriton lantzi	Azerbaijan: Haftoni Settlement	38.75	48.75	Skorinov et al. (2014)	Literature	170
Lissotriton lantzi	Azerbaijan: Lenkoran’ City	38.7333	48.8333	Skorinov et al. (2014)	Literature	-22
Lissotriton lantzi	Azerbaijan: Rybkhoz settlement	39.9667	48.85	Skorinov et al. (2014)	Literature	-19
Lissotriton lantzi	Georgia: Bakuriani2	41.7505	43.5167	Personal database	Google Earth	1673
Lissotriton lantzi	Georgia: Chorotsk	42.4684	42.1112	Personal database	Google Earth	131
Lissotriton lantzi	Georgia: Dabadzveli Lake	41.764	43.356	Personal database	Google Earth	1818
Lissotriton lantzi	Georgia: Kulevi	42.2707	41.7102	Personal database	Google Earth	2
Lissotriton lantzi	Georgia: Senaki	42.178	42.0714	Personal database	Google Earth	14
Lissotriton lantzi	Georgia: Tetri_Tsklebi	41.8704	45.2581	Personal database	GPS	1447
Lissotriton lantzi	Georgia: Adzgament nature reserve	42.1333	42.7833	Skorinov et al. (2014)	Literature	126
Lissotriton lantzi	Georgia: Akhaldaba Settlement	41.9333	43.4833	Skorinov et al. (2014)	Literature	773
Lissotriton lantzi	Georgia: Aspindza Town	41.5833	43.25	Skorinov et al. (2014)	Literature	1157
Lissotriton lantzi	Georgia: Babaneur nature reserve	42.0833	45.3833	Skorinov et al. (2014)	Literature	431
Lissotriton lantzi	Georgia: Bakuriani Settlement	41.7333	43.5333	Skorinov et al. (2014)	Literature	1767
Lissotriton lantzi	Georgia: Batsara nature reserve	42.2333	45.2333	Skorinov et al. (2014)	Literature	1581
Lissotriton lantzi	Georgia: Batumi City	41.65	41.65	Skorinov et al. (2014)	Literature	0
Lissotriton lantzi	Georgia: Bebesyr Lake	42.6833	41.5833	Skorinov et al. (2014)	Literature	17
Lissotriton lantzi	Georgia: Bekmar Village	42.25	43.8167	Skorinov et al. (2014)	Literature	956
Lissotriton lantzi	Georgia: Borjomi nature reserve	41.85	43.3667	Skorinov et al. (2014)	Literature	1182
Lissotriton lantzi	Georgia: Borjomi Town	41.8333	43.3833	Skorinov et al. (2014)	Literature	984
Lissotriton lantzi	Georgia: Chiantba Lake	41.9167	45.3667	Skorinov et al. (2014)	Literature	971
Lissotriton lantzi	Georgia: Chili-Tba Lake	41.8167	44.6833	Skorinov et al. (2014)	Literature	984
Lissotriton lantzi	Georgia: Chobareti village	41.5833	43.1333	Skorinov et al. (2014)	Literature	1458
Lissotriton lantzi	Georgia: Dabadzveli Lake	42.2833	42.9167	Skorinov et al. (2014)	Literature	687
Lissotriton lantzi	Georgia: Dampalet swamp	42.2667	43.9333	Skorinov et al. (2014)	Literature	1038
Lissotriton lantzi	Georgia: Didi-Mitarbi village	41.7333	43.5667	Skorinov et al. (2014)	Literature	1828
Lissotriton lantzi	Georgia: Dzegeva lakes	41.8333	44.6	Skorinov et al. (2014)	Literature	735
Lissotriton lantzi	Georgia: Edisi	42.5333	44.2	Skorinov et al. (2014)	Literature	2076
Lissotriton lantzi	Georgia: Ertatsminda Lake	41.8333	44.3167	Skorinov et al. (2014)	Literature	1486
Lissotriton lantzi	Georgia: Gagra Town	43.3	40.25	Skorinov et al. (2014)	Literature	11
Lissotriton lantzi	Georgia: Kakhisi-Tba Lake	41.75	43.3333	Skorinov et al. (2014)	Literature	1766
Lissotriton lantzi	Georgia: Kharagauli	42.0167	43.1833	Skorinov et al. (2014)	Literature	355
Lissotriton lantzi	Georgia: Kobuleti Town	41.8167	41.7833	Skorinov et al. (2014)	Literature	4
Lissotriton lantzi	Georgia: Kolkhida national park	42.15	41.8	Skorinov et al. (2014)	Literature	1
Lissotriton lantzi	Georgia: Kursebi Mount	42.3167	42.7667	Skorinov et al. (2014)	Literature	411
Lissotriton lantzi	Georgia: Kutaisi Town	42.25	42.7	Skorinov et al. (2014)	Literature	136
Lissotriton lantzi	Georgia: Kutyki point	43.5167	40.5833	Skorinov et al. (2014)	Literature	2044
Lissotriton lantzi	Georgia: Kvareli Town	41.95	45.8	Skorinov et al. (2014)	Literature	426
Lissotriton lantzi	Georgia: Lagodekhi nature reserve	41.8667	46.3333	Skorinov et al. (2014)	Literature	1119
Lissotriton lantzi	Georgia: Ldzaa village	43.1833	40.35	Skorinov et al. (2014)	Literature	8
Lissotriton lantzi	Georgia: Machara village	42.9333	41.0833	Skorinov et al. (2014)	Literature	0
Lissotriton lantzi	Georgia: Malaya Ritza Lake	43.4667	40.5	Skorinov et al. (2014)	Literature	1241
Lissotriton lantzi	Georgia: Manglisi village	41.7	44.3667	Skorinov et al. (2014)	Literature	1267
Lissotriton lantzi	Georgia: Mayak Lake	42.9833	40.9667	Skorinov et al. (2014)	Literature	0
Lissotriton lantzi	Georgia: Mukhuri Mount	42.5833	42.15	Skorinov et al. (2014)	Literature	211
Lissotriton lantzi	Georgia: Mzy Lake	43.5167	40.5833	Skorinov et al. (2014)	Literature	2044
Lissotriton lantzi	Georgia: Natanebi station	41.9333	41.8	Skorinov et al. (2014)	Literature	10
Lissotriton lantzi	Georgia: Okriba point	42.2833	42.75	Skorinov et al. (2014)	Literature	212
Lissotriton lantzi	Georgia: Pitsunda Town	43.1833	40.3167	Skorinov et al. (2014)	Literature	0
Lissotriton lantzi	Georgia: Poti Town	42.1833	41.65	Skorinov et al. (2014)	Literature	-1
Lissotriton lantzi	Georgia: Pskhu-Gumista nature reserve	42.8167	41.1833	Skorinov et al. (2014)	Literature	13
Lissotriton lantzi	Georgia: Sakochavskie lakes	41.7333	43.4667	Skorinov et al. (2014)	Literature	1619
Lissotriton lantzi	Georgia: Satapli national park	42.3167	42.65	Skorinov et al. (2014)	Literature	276
Lissotriton lantzi	Georgia: Satovle ridge	41.7833	44.5667	Skorinov et al. (2014)	Literature	1234
Lissotriton lantzi	Georgia: Sukhum	43	40.9833	Skorinov et al. (2014)	Literature	9
Lissotriton lantzi	Georgia: Surami Pass	42.0333	43.5	Skorinov et al. (2014)	Literature	916
Lissotriton lantzi	Georgia: Tba Settlement	41.4667	43.4333	Skorinov et al. (2014)	Literature	1663
Lissotriton lantzi	Georgia: Tbilisi City	41.7167	44.7833	Skorinov et al. (2014)	Literature	445
Lissotriton lantzi	Georgia: Trialeti Mountains	41.8167	43.3833	Skorinov et al. (2014)	Literature	1281
Lissotriton lantzi	Georgia: Tsiskara meteostation	41.7	41.8833	Skorinov et al. (2014)	Literature	1142
Lissotriton lantzi	Georgia: Tsivi-Gombori mounts	41.8333	45.45	Skorinov et al. (2014)	Literature	1235
Lissotriton lantzi	Georgia: Tskhinval Town	42.2167	43.9833	Skorinov et al. (2014)	Literature	853
Lissotriton lantzi	Georgia: Tsodoreti forestry	41.75	44.6167	Skorinov et al. (2014)	Literature	1075
Lissotriton lantzi	Georgia: Upper Triale Lake	41.5	44.1	Skorinov et al. (2014)	Literature	1567
Lissotriton lantzi	Georgia: Vorontsovskoe Plateau	41.8167	43.45	Skorinov et al. (2014)	Literature	1101
Lissotriton lantzi	Georgia: Yagoras-Veli village	41.7333	43.4833	Skorinov et al. (2014)	Literature	1606
Lissotriton lantzi	Russia: Khodzhokh	44.313	40.0138	Personal database	Google Earth	444
Lissotriton lantzi	Russia: “Belye Nochi” resort	43.6667	39.6333	Skorinov et al. (2014)	Literature	117
Lissotriton lantzi	Russia: “Belye scaly” breakaway	43.55	39.8833	Skorinov et al. (2014)	Literature	104
Lissotriton lantzi	Russia: “Izvestiya” sanatorium	43.6833	40.2	Skorinov et al. (2014)	Literature	544
Lissotriton lantzi	Russia: “Izvestiya” sanatorium	43.4667	39.9	Skorinov et al. (2014)	Literature	49
Lissotriton lantzi	Russia: “Voskhod” microregion	44.5833	40.1333	Skorinov et al. (2014)	Literature	236
Lissotriton lantzi	Russia: “Yuzhnye kul’tury” Park	43.4167	39.9333	Skorinov et al. (2014)	Literature	4
Lissotriton lantzi	Russia: Abrau-Dyurso Settlement	44.6833	37.5833	Skorinov et al. (2014)	Literature	145
Lissotriton lantzi	Russia: Achishkho Pass	43.5667	40.2333	Skorinov et al. (2014)	Literature	762
Lissotriton lantzi	Russia: Adler City	43.45	39.9333	Skorinov et al. (2014)	Literature	22
Lissotriton lantzi	Russia: Afipsip village	44.9833	38.7667	Skorinov et al. (2014)	Literature	20
Lissotriton lantzi	Russia: Aibga Village	43.5833	40.2	Skorinov et al. (2014)	Literature	700
Lissotriton lantzi	Russia: Aishkha-1 Mount	43.6667	40.4667	Skorinov et al. (2014)	Literature	2284
Lissotriton lantzi	Russia: Akhmetovskaya village	44.1667	41.0333	Skorinov et al. (2014)	Literature	584
Lissotriton lantzi	Russia: Akhsarisar village	43.1333	43.8167	Skorinov et al. (2014)	Literature	847
Lissotriton lantzi	Russia: Aksau Reservoir	43.7833	41.6833	Skorinov et al. (2014)	Literature	1030
Lissotriton lantzi	Russia: Argun River	43.3	45.85	Skorinov et al. (2014)	Literature	112
Lissotriton lantzi	Russia: Arkhiereysky forest	45.0333	41.95	Skorinov et al. (2014)	Literature	614
Lissotriton lantzi	Russia: Armavir Town	45	41.1167	Skorinov et al. (2014)	Literature	184
Lissotriton lantzi	Russia: Azmych River	43.55	40.5667	Skorinov et al. (2014)	Literature	1846
Lissotriton lantzi	Russia: Babuk-Aul cordon	43.8833	39.8167	Skorinov et al. (2014)	Literature	411
Lissotriton lantzi	Russia: Baranovka Village	43.7	39.6833	Skorinov et al. (2014)	Literature	146
Lissotriton lantzi	Russia: Bekeshey Mount	44.0167	39.6167	Skorinov et al. (2014)	Literature	1328
Lissotriton lantzi	Russia: Belaya Rechka village	43.4167	43.5	Skorinov et al. (2014)	Literature	815
Lissotriton lantzi	Russia: Belorechenskiy pass	43.9333	39.9167	Skorinov et al. (2014)	Literature	1743
Lissotriton lantzi	Russia: Besleneevskaya Village	44.2167	40.7167	Skorinov et al. (2014)	Literature	523
Lissotriton lantzi	Russia: Between Pervomayskoe village and Erten-Kort Mount	43.0333	46.0667	Skorinov et al. (2014)	Literature	791
Lissotriton lantzi	Russia: Between Yalkoy-Mokhk and Akhkinchu-Borzoy villages	43.1167	46.1833	Skorinov et al. (2014)	Literature	373
Lissotriton lantzi	Russia: Bol’shoy Akhun Mount	43.5333	39.85	Skorinov et al. (2014)	Literature	276
Lissotriton lantzi	Russia: Bol’shoy Kichmay village	43.8333	39.5	Skorinov et al. (2014)	Literature	31
Lissotriton lantzi	Russia: Bol’shoy Utrish village	44.7667	37.3833	Skorinov et al. (2014)	Literature	0
Lissotriton lantzi	Russia: Bukovo village	43.6833	41.4667	Skorinov et al. (2014)	Literature	1290
Lissotriton lantzi	Russia: Bzugu River	43.6167	39.7667	Skorinov et al. (2014)	Literature	192
Lissotriton lantzi	Russia: Bzych Ridge	43.8167	39.9667	Skorinov et al. (2014)	Literature	1392
Lissotriton lantzi	Russia: Chernorech’e kordon	43.9333	40.6833	Skorinov et al. (2014)	Literature	954
Lissotriton lantzi	Russia: Cheshe Lake	44.1	39.7667	Skorinov et al. (2014)	Literature	1507
Lissotriton lantzi	Russia: Damkhurts Settlement	43.6667	40.8333	Skorinov et al. (2014)	Literature	1294
Lissotriton lantzi	Russia: Dausuz village	43.8	41.55	Skorinov et al. (2014)	Literature	1003
Lissotriton lantzi	Russia: Dylym village	43.0667	46.6167	Skorinov et al. (2014)	Literature	646
Lissotriton lantzi	Russia: Dzhubga Settlement	44.3167	38.7	Skorinov et al. (2014)	Literature	5
Lissotriton lantzi	Russia: Elbursskiy Settlement	43.5833	42.1333	Skorinov et al. (2014)	Literature	1382
Lissotriton lantzi	Russia: Endirey village	43.15	46.65	Skorinov et al. (2014)	Literature	396
Lissotriton lantzi	Russia: Essentuki Town	44.0333	42.85	Skorinov et al. (2014)	Literature	610
Lissotriton lantzi	Russia: Former estate of N Ya Dinnik	45.0333	41.9667	Skorinov et al. (2014)	Literature	576
Lissotriton lantzi	Russia: Georgievsk Town	44.15	43.4667	Skorinov et al. (2014)	Literature	307
Lissotriton lantzi	Russia: Gerpigem Ridge	44.1333	40.8	Skorinov et al. (2014)	Literature	658
Lissotriton lantzi	Russia: Glebovka village	44.7	37.6333	Skorinov et al. (2014)	Literature	34
Lissotriton lantzi	Russia: Golubye Lakes	43.2167	43.55	Skorinov et al. (2014)	Literature	1040
Lissotriton lantzi	Russia: Goryachiy Klyuch Town	44.65	39.1333	Skorinov et al. (2014)	Literature	95
Lissotriton lantzi	Russia: Goryachiy Klyuch Town	44.6667	39.15	Skorinov et al. (2014)	Literature	70
Lissotriton lantzi	Russia: Grachevskiy Pass	44	39.6667	Skorinov et al. (2014)	Literature	1199
Lissotriton lantzi	Russia: Gundelenskoe canion	43.5833	43.0167	Skorinov et al. (2014)	Literature	1304
Lissotriton lantzi	Russia: Guzeripl’ cordon	44	40.1333	Skorinov et al. (2014)	Literature	693
Lissotriton lantzi	Russia: Il’skiy Settlement	44.85	38.55	Skorinov et al. (2014)	Literature	67
Lissotriton lantzi	Russia: Indysh Settlement	43.6333	42.2167	Skorinov et al. (2014)	Literature	1629
Lissotriton lantzi	Russia: Kabardino-Balkarian nature reserve	43.1667	43.2333	Skorinov et al. (2014)	Literature	1621
Lissotriton lantzi	Russia: Kalukh village	43.0833	43.8167	Skorinov et al. (2014)	Literature	943
Lissotriton lantzi	Russia: Kaluzhskaya village	44.7667	38.9667	Skorinov et al. (2014)	Literature	80
Lissotriton lantzi	Russia: Kamennomostskiy Settlement	44.3	40.1833	Skorinov et al. (2014)	Literature	393
Lissotriton lantzi	Russia: Kamyshanova Polyana biological station	44.1667	40.0333	Skorinov et al. (2014)	Literature	1172
Lissotriton lantzi	Russia: Kashtany Village	43.5167	39.9	Skorinov et al. (2014)	Literature	210
Lissotriton lantzi	Russia: Kenzhe village	43.4833	43.55	Skorinov et al. (2014)	Literature	580
Lissotriton lantzi	Russia: Khadyzhensk Town	44.4167	39.5167	Skorinov et al. (2014)	Literature	113
Lissotriton lantzi	Russia: Khakudzh Mount	44.0167	39.6333	Skorinov et al. (2014)	Literature	1297
Lissotriton lantzi	Russia: Khasan’ya village	43.4167	43.5667	Skorinov et al. (2014)	Literature	686
Lissotriton lantzi	Russia: Khmelevskogo lakes	43.7167	40.2	Skorinov et al. (2014)	Literature	1735
Lissotriton lantzi	Russia: Kholmskaya village	44.8333	38.3833	Skorinov et al. (2014)	Literature	49
Lissotriton lantzi	Russia: Khosta’s yew-box grove	43.5333	39.8833	Skorinov et al. (2014)	Literature	95
Lissotriton lantzi	Russia: Khuko Lake	43.9333	39.8	Skorinov et al. (2014)	Literature	1546
Lissotriton lantzi	Russia: Kichmalka River	43.7833	42.9333	Skorinov et al. (2014)	Literature	1133
Lissotriton lantzi	Russia: Kisha cordon	44.0667	40.1667	Skorinov et al. (2014)	Literature	781
Lissotriton lantzi	Russia: Kislovodsk Town	43.9167	42.7167	Skorinov et al. (2014)	Literature	793
Lissotriton lantzi	Russia: Komsomol’skie ponds	45.05	41.95	Skorinov et al. (2014)	Literature	563
Lissotriton lantzi	Russia: Kordonikskaya village	43.8333	41.7	Skorinov et al. (2014)	Literature	939
Lissotriton lantzi	Russia: Kotlyarevskaya village	43.5667	44.05	Skorinov et al. (2014)	Literature	227
Lissotriton lantzi	Russia: Krasnaya Polyana Settlement	43.6833	40.25	Skorinov et al. (2014)	Literature	612
Lissotriton lantzi	Russia: Krasnodar City	45.0333	39	Skorinov et al. (2014)	Literature	27
Lissotriton lantzi	Russia: Krasnokumskoe village	44.1667	43.5	Skorinov et al. (2014)	Literature	255
Lissotriton lantzi	Russia: Kravtsovo Lake	45	41.8167	Skorinov et al. (2014)	Literature	537
Lissotriton lantzi	Russia: Krepostnaya village	44.7	38.6667	Skorinov et al. (2014)	Literature	60
Lissotriton lantzi	Russia: Krepostnaya village	44.7333	38.7167	Skorinov et al. (2014)	Literature	51
Lissotriton lantzi	Russia: Krugloe Lake	43.8	40.1833	Skorinov et al. (2014)	Literature	2695
Lissotriton lantzi	Russia: Krymsk Town	44.8833	37.9333	Skorinov et al. (2014)	Literature	45
Lissotriton lantzi	Russia: Kuban’ Reservoir	44.2167	42.3333	Skorinov et al. (2014)	Literature	638
Lissotriton lantzi	Russia: Kunitskiy forest	44.7833	42.5167	Skorinov et al. (2014)	Literature	320
Lissotriton lantzi	Russia: Laba River	44.3	40.8667	Skorinov et al. (2014)	Literature	448
Lissotriton lantzi	Russia: Lagernyi cordon	44.0333	40.1833	Skorinov et al. (2014)	Literature	1167
Lissotriton lantzi	Russia: Lagonaki Plateau	44.0667	40.0167	Skorinov et al. (2014)	Literature	1614
Lissotriton lantzi	Russia: Laura cordon	43.7	40.2667	Skorinov et al. (2014)	Literature	582
Lissotriton lantzi	Russia: Laura River	43.7167	40.2833	Skorinov et al. (2014)	Literature	1014
Lissotriton lantzi	Russia: Lazarevskaya Settlement	43.9167	39.35	Skorinov et al. (2014)	Literature	25
Lissotriton lantzi	Russia: Lipovchanskiy homestead	44.8	42.0833	Skorinov et al. (2014)	Literature	511
Lissotriton lantzi	Russia: Malaya Chura Mount	43.85	40.0167	Skorinov et al. (2014)	Literature	1909
Lissotriton lantzi	Russia: Malka River	43.6667	42.6833	Skorinov et al. (2014)	Literature	1747
Lissotriton lantzi	Russia: Maloe Lake	44.2333	42.2	Skorinov et al. (2014)	Literature	612
Lissotriton lantzi	Russia: Mamayskiy forest	44.9833	41.9833	Skorinov et al. (2014)	Literature	608
Lissotriton lantzi	Russia: Mar’enkina polyana point	44.0667	40.2667	Skorinov et al. (2014)	Literature	1283
Lissotriton lantzi	Russia: Mar’inskaya village	43.8667	43.4833	Skorinov et al. (2014)	Literature	442
Lissotriton lantzi	Russia: Marukhskoe Reservoir	43.7833	41.65	Skorinov et al. (2014)	Literature	1017
Lissotriton lantzi	Russia: Mashuk Mount	44.05	43.0833	Skorinov et al. (2014)	Literature	784
Lissotriton lantzi	Russia: Meteostation near Krasnaya Polyana Settlement	43.7333	40.1167	Skorinov et al. (2014)	Literature	2298
Lissotriton lantzi	Russia: Mezmay Village	44.1833	39.95	Skorinov et al. (2014)	Literature	885
Lissotriton lantzi	Russia: Mineral’nye Vody Town	44.2	43.0833	Skorinov et al. (2014)	Literature	381
Lissotriton lantzi	Russia: Molochnyi homestead	45.0833	41.7667	Skorinov et al. (2014)	Literature	229
Lissotriton lantzi	Russia: Mostovskoy Settlement	44.3833	40.7667	Skorinov et al. (2014)	Literature	391
Lissotriton lantzi	Russia: Mutnyanka beam	45.0333	42	Skorinov et al. (2014)	Literature	494
Lissotriton lantzi	Russia: Mzymta River	43.65	40.1667	Skorinov et al. (2014)	Literature	528
Lissotriton lantzi	Russia: Mzymta River	43.4333	39.9333	Skorinov et al. (2014)	Literature	8
Lissotriton lantzi	Russia: Nalchik City	43.4667	43.4333	Skorinov et al. (2014)	Literature	885
Lissotriton lantzi	Russia: Nevinnomysskaya Mount	44.6333	41.9333	Skorinov et al. (2014)	Literature	313
Lissotriton lantzi	Russia: Nikel’ Settlement	44.1667	40.15	Skorinov et al. (2014)	Literature	596
Lissotriton lantzi	Russia: Nizhnyaya Teberda village	43.6333	41.8667	Skorinov et al. (2014)	Literature	1038
Lissotriton lantzi	Russia: North-Ossetian Nature Reserve	42.7667	44.0833	Skorinov et al. (2014)	Literature	2131
Lissotriton lantzi	Russia: Novoekaterinovskaya village	44.6833	42.0833	Skorinov et al. (2014)	Literature	371
Lissotriton lantzi	Russia: Novomikhaylovskiy Settlement	44.25	38.85	Skorinov et al. (2014)	Literature	6
Lissotriton lantzi	Russia: Novomikhaylovskiy Settlement	44.25	38.8167	Skorinov et al. (2014)	Literature	48
Lissotriton lantzi	Russia: Novorossiysk Town	44.7167	37.7667	Skorinov et al. (2014)	Literature	10
Lissotriton lantzi	Russia: Novozavedennoe village	44.25	43.6333	Skorinov et al. (2014)	Literature	195
Lissotriton lantzi	Russia: Nozhay-Yurt village	43.0833	46.3667	Skorinov et al. (2014)	Literature	674
Lissotriton lantzi	Russia: Oblego Mount	44.5167	38.4833	Skorinov et al. (2014)	Literature	582
Lissotriton lantzi	Russia: Ovsyannikova Mount	43.5333	39.8833	Skorinov et al. (2014)	Literature	95
Lissotriton lantzi	Russia: Papay Mount	44.6333	38.4	Skorinov et al. (2014)	Literature	355
Lissotriton lantzi	Russia: Piket Mount	43.65	39.7667	Skorinov et al. (2014)	Literature	285
Lissotriton lantzi	Russia: Plancheskaya Schel’ village	44.6333	38.6	Skorinov et al. (2014)	Literature	188
Lissotriton lantzi	Russia: Podkumok Settlement	43.9667	42.7667	Skorinov et al. (2014)	Literature	785
Lissotriton lantzi	Russia: Psebay Settlement	44.0833	40.7667	Skorinov et al. (2014)	Literature	664
Lissotriton lantzi	Russia: Psou checkpoint	43.3833	40	Skorinov et al. (2014)	Literature	0
Lissotriton lantzi	Russia: Rimba and Kalina springs	44.7	38.5333	Skorinov et al. (2014)	Literature	268
Lissotriton lantzi	Russia: Roza-Khutor point	43.6333	40.3	Skorinov et al. (2014)	Literature	2084
Lissotriton lantzi	Russia: Sakhray Settlement	44.2	40.2833	Skorinov et al. (2014)	Literature	523
Lissotriton lantzi	Russia: Saratovskaya village	44.7	39.2167	Skorinov et al. (2014)	Literature	41
Lissotriton lantzi	Russia: Sergey-Pole Settlement	43.6667	39.7	Skorinov et al. (2014)	Literature	227
Lissotriton lantzi	Russia: Shakhgenskoe canyon	43.4833	40.05	Skorinov et al. (2014)	Literature	127
Lissotriton lantzi	Russia: Shirokaya River	43.9667	39.55	Skorinov et al. (2014)	Literature	459
Lissotriton lantzi	Russia: Shkol’noe Lake	43.6833	39.7167	Skorinov et al. (2014)	Literature	233
Lissotriton lantzi	Russia: Sipyagin pond	45.05	41.95	Skorinov et al. (2014)	Literature	563
Lissotriton lantzi	Russia: Sobachiy homestead	45.0167	41.8167	Skorinov et al. (2014)	Literature	655
Lissotriton lantzi	Russia: Sochi City	43.6167	39.7333	Skorinov et al. (2014)	Literature	112
Lissotriton lantzi	Russia: Soldato-Aleksandrovskoe village	44.2667	43.75	Skorinov et al. (2014)	Literature	184
Lissotriton lantzi	Russia: Solnechnodol’sk Settlement	45.3	41.5	Skorinov et al. (2014)	Literature	168
Lissotriton lantzi	Russia: Stavropol’ City	45.05	41.9833	Skorinov et al. (2014)	Literature	510
Lissotriton lantzi	Russia: Stavropolskaya village	44.7167	38.8167	Skorinov et al. (2014)	Literature	46
Lissotriton lantzi	Russia: Storozhevaya village	43.85	41.4333	Skorinov et al. (2014)	Literature	961
Lissotriton lantzi	Russia: Strizhament Hill	44.8167	42.0167	Skorinov et al. (2014)	Literature	611
Lissotriton lantzi	Russia: Sukhoy Liman Lake	44.75	37.45	Skorinov et al. (2014)	Literature	290
Lissotriton lantzi	Russia: Sukko Settlement	44.7833	37.4	Skorinov et al. (2014)	Literature	189
Lissotriton lantzi	Russia: Sunzha District	43.1333	45.0833	Skorinov et al. (2014)	Literature	620
Lissotriton lantzi	Russia: Sunzha River	43.3667	45.8333	Skorinov et al. (2014)	Literature	91
Lissotriton lantzi	Russia: Tambukan Lake	43.95	43.15	Skorinov et al. (2014)	Literature	555
Lissotriton lantzi	Russia: Tamisk resort	42.95	44.2167	Skorinov et al. (2014)	Literature	1174
Lissotriton lantzi	Russia: Tarskoe village	42.95	44.7667	Skorinov et al. (2014)	Literature	822
Lissotriton lantzi	Russia: Tashly beam	45.0333	41.9333	Skorinov et al. (2014)	Literature	648
Lissotriton lantzi	Russia: Tatarka village	44.9667	41.8667	Skorinov et al. (2014)	Literature	602
Lissotriton lantzi	Russia: Teberda Nature Reserve	43.3833	41.7	Skorinov et al. (2014)	Literature	1515
Lissotriton lantzi	Russia: Teberda Town	43.4333	41.7333	Skorinov et al. (2014)	Literature	1418
Lissotriton lantzi	Russia: Teberda Town	43.35	41.6833	Skorinov et al. (2014)	Literature	1424
Lissotriton lantzi	Russia: Temnolesskaya village	44.85	42.05	Skorinov et al. (2014)	Literature	476
Lissotriton lantzi	Russia: Terek River	43.3333	45.9167	Skorinov et al. (2014)	Literature	83
Lissotriton lantzi	Russia: Tuapse Town	44.1	39.0667	Skorinov et al. (2014)	Literature	36
Lissotriton lantzi	Russia: Tul’skiy Settlement	44.5167	40.1667	Skorinov et al. (2014)	Literature	273
Lissotriton lantzi	Russia: Tur Mount	44.2	40.4667	Skorinov et al. (2014)	Literature	1138
Lissotriton lantzi	Russia: Ubinskaya Settlement	44.7	38.85	Skorinov et al. (2014)	Literature	146
Lissotriton lantzi	Russia: Uglovoy Ridge	43.55	40.6	Skorinov et al. (2014)	Literature	2105
Lissotriton lantzi	Russia: Verkhniy Yankul’ Settlement	44.8667	42.5	Skorinov et al. (2014)	Literature	505
Lissotriton lantzi	Russia: Veseloe Settlement	43.3833	39.9667	Skorinov et al. (2014)	Literature	0
Lissotriton lantzi	Russia: Vodolechebnitsa sanatorium	44.6	40.1	Skorinov et al. (2014)	Literature	227
Lissotriton lantzi	Russia: Volov’e Lake	43.95	39.8833	Skorinov et al. (2014)	Literature	1913
Lissotriton lantzi	Russia: Vostochnaya Khosta and Zapadnaya Khosta rivers fusion	43.55	39.8833	Skorinov et al. (2014)	Literature	104
Lissotriton lantzi	Russia: Vostochnyi Settlement	44.6	40.6	Skorinov et al. (2014)	Literature	329
Lissotriton lantzi	Russia: Vozrozhdenie Settlement	44.5167	38.2667	Skorinov et al. (2014)	Literature	544
Lissotriton lantzi	Russia: Vshivoe Lake	44.9667	42.0667	Skorinov et al. (2014)	Literature	503
Lissotriton lantzi	Russia: Watershed of Ashe and Psezuapse rivers	43.9833	39.4333	Skorinov et al. (2014)	Literature	242
Lissotriton lantzi	Russia: Yankul’ village	44.7	42.2667	Skorinov et al. (2014)	Literature	495
Lissotriton lantzi	Russia: Yubileynyi Settlement	43.9167	41.1833	Skorinov et al. (2014)	Literature	851
Lissotriton lantzi	Russia: Zelenchukskaya village	43.85	41.6	Skorinov et al. (2014)	Literature	940
Lissotriton lantzi	Russia: Zerkal’noe Lake	43.7333	40.1667	Skorinov et al. (2014)	Literature	1818
Lissotriton lantzi	Russia: Zheleznovodsk City	44.1333	43.0333	Skorinov et al. (2014)	Literature	616
Lissotriton lantzi	Russia: Zverosovkhoz village	43.6333	44.05	Skorinov et al. (2014)	Literature	213
Lissotriton lantzi	Turkey: Artvin Town	41.1667	41.8167	Skorinov et al. (2014)	Literature	561
Lissotriton schmidtleri	Bulgaria: Ahtopol	42.1018	27.9335	Personal database	GPS	1
Lissotriton schmidtleri	Bulgaria: Aleksandrovo	42.6019	25.0994	Personal database	GPS	470
Lissotriton schmidtleri	Bulgaria: Balgarin	41.9438	25.9496	Personal database	GPS	227
Lissotriton schmidtleri	Bulgaria: Balgarska Polyana	42.0365	26.2003	Personal database	GPS	425
Lissotriton schmidtleri	Bulgaria: Bivolyane	41.5703	25.5159	Personal database	GPS	411
Lissotriton schmidtleri	Bulgaria: Bryastovo 1	41.9266	25.2888	Personal database	GPS	410
Lissotriton schmidtleri	Bulgaria: Bryastovo 2	41.9342	25.2996	Personal database	GPS	355
Lissotriton schmidtleri	Bulgaria: Bryastovo 3	41.9273	25.317	Personal database	GPS	528
Lissotriton schmidtleri	Bulgaria: Chayka	41.4979	25.5465	Personal database	GPS	378
Lissotriton schmidtleri	Bulgaria: Chernichevo 1	41.3474	25.8002	Personal database	GPS	623
Lissotriton schmidtleri	Bulgaria: Chernichevo 2	41.3526	25.7946	Personal database	GPS	591
Lissotriton schmidtleri	Bulgaria: Chernichevo 3	41.3535	25.7843	Personal database	GPS	601
Lissotriton schmidtleri	Bulgaria: Dimitrovche	41.8078	26.2107	Personal database	GPS	123
Lissotriton schmidtleri	Bulgaria: Dositeevo	41.917	26.0215	Personal database	GPS	148
Lissotriton schmidtleri	Bulgaria: Dositeevo 1	41.9001	25.9992	Personal database	GPS	86
Lissotriton schmidtleri	Bulgaria: Dositeevo 2	41.9061	25.9956	Personal database	GPS	86
Lissotriton schmidtleri	Bulgaria: Dzhanka	41.5426	25.6646	Personal database	GPS	243
Lissotriton schmidtleri	Bulgaria: Golyamo Krushevo	42.2228	26.9277	Personal database	GPS	252
Lissotriton schmidtleri	Bulgaria: Gorni Yurutsi 1	41.3476	25.9167	Personal database	GPS	386
Lissotriton schmidtleri	Bulgaria: Gorni Yurutsi 2	41.353	25.9156	Personal database	GPS	471
Lissotriton schmidtleri	Bulgaria: Gorni Yurutsi 3	41.3533	25.9064	Personal database	GPS	611
Lissotriton schmidtleri	Bulgaria: Gorno Lukovo	41.3681	26.1113	Personal database	GPS	222
Lissotriton schmidtleri	Bulgaria: Harmanli	41.9292	25.9354	Personal database	GPS	113
Lissotriton schmidtleri	Bulgaria: Hisar	41.5389	25.6389	Personal database	GPS	270
Lissotriton schmidtleri	Bulgaria: Kamenka 1	41.4823	25.6713	Personal database	GPS	477
Lissotriton schmidtleri	Bulgaria: Kamenka 2	41.4732	25.6897	Personal database	GPS	370
Lissotriton schmidtleri	Bulgaria: Kamenka 3	41.4802	25.6876	Personal database	GPS	348
Lissotriton schmidtleri	Bulgaria: Kamenka 4	41.487	25.6867	Personal database	GPS	484
Lissotriton schmidtleri	Bulgaria: Karamfil	41.4721	25.5618	Personal database	GPS	390
Lissotriton schmidtleri	Bulgaria: Kavatsite	42.3483	27.7137	Personal database	GPS	13
Lissotriton schmidtleri	Bulgaria: Kolets 1	41.8583	25.3525	Personal database	GPS	297
Lissotriton schmidtleri	Bulgaria: Kolets 2	41.8647	25.3476	Personal database	GPS	367
Lissotriton schmidtleri	Bulgaria: Kolets 3	41.8665	25.3246	Personal database	GPS	334
Lissotriton schmidtleri	Bulgaria: Kolets 4	41.869	25.3244	Personal database	GPS	408
Lissotriton schmidtleri	Bulgaria: Kolets 5	41.8693	25.3478	Personal database	GPS	501
Lissotriton schmidtleri	Bulgaria: Kolets 6	41.8705	25.3397	Personal database	GPS	376
Lissotriton schmidtleri	Bulgaria: Kolets 7	41.8716	25.3282	Personal database	GPS	370
Lissotriton schmidtleri	Bulgaria: Kolets 8	41.8757	25.338	Personal database	GPS	374
Lissotriton schmidtleri	Bulgaria: Konstantinovo	41.9976	25.7803	Personal database	GPS	187
Lissotriton schmidtleri	Bulgaria: Kostur	41.9727	26.2919	Personal database	GPS	459
Lissotriton schmidtleri	Bulgaria: Kotlari 1	41.615	25.7417	Personal database	GPS	250
Lissotriton schmidtleri	Bulgaria: Kotlari 2	41.6158	25.7328	Personal database	GPS	341
Lissotriton schmidtleri	Bulgaria: Kovil 1	41.5127	25.6601	Personal database	GPS	377
Lissotriton schmidtleri	Bulgaria: Kovil 2	41.5245	25.6649	Personal database	GPS	328
Lissotriton schmidtleri	Bulgaria: Kraymorie	42.4455	27.4713	Personal database	GPS	13
Lissotriton schmidtleri	Bulgaria: Kremen	41.2884	25.3251	Personal database	GPS	432
Lissotriton schmidtleri	Bulgaria: Krilatitsa	41.363	25.3326	Personal database	GPS	361
Lissotriton schmidtleri	Bulgaria: Lešnikovo	41.8414	25.9198	Personal database	GPS	152
Lissotriton schmidtleri	Bulgaria: Lesova Polyana 1	41.5958	25.5387	Personal database	GPS	334
Lissotriton schmidtleri	Bulgaria: Lesova Polyana 2	41.5985	25.5449	Personal database	GPS	454
Lissotriton schmidtleri	Bulgaria: Lesovo 1	41.9899	26.5257	Personal database	GPS	199
Lissotriton schmidtleri	Bulgaria: Lesovo 2	41.9965	26.5425	Personal database	GPS	288
Lissotriton schmidtleri	Bulgaria: Levka 1	41.8786	26.2534	Personal database	GPS	268
Lissotriton schmidtleri	Bulgaria: Levka 2	41.8798	26.2749	Personal database	GPS	264
Lissotriton schmidtleri	Bulgaria: Lozenets	42.2067	27.8008	Personal database	GPS	29
Lissotriton schmidtleri	Bulgaria: Madžarovo	41.6532	25.8743	Personal database	Google Earth	191
Lissotriton schmidtleri	Bulgaria: Malko Bryagovo	41.685	25.887	Personal database	GPS	175
Lissotriton schmidtleri	Bulgaria: Malko Tarnovo 1	41.9917	27.567	Personal database	GPS	389
Lissotriton schmidtleri	Bulgaria: Malko Tarnovo 2	42.0054	27.5947	Personal database	GPS	219
Lissotriton schmidtleri	Bulgaria: Malko Tarnovo 3	42.0156	27.5945	Personal database	GPS	250
Lissotriton schmidtleri	Bulgaria: Mineralni Bani 1	41.9119	25.339	Personal database	GPS	370
Lissotriton schmidtleri	Bulgaria: Mineralni Bani 2	41.9254	25.3506	Personal database	GPS	322
Lissotriton schmidtleri	Bulgaria: Momina Salza 1	41.6076	25.5356	Personal database	GPS	414
Lissotriton schmidtleri	Bulgaria: Momina Salza 2	41.6109	25.5321	Personal database	GPS	272
Lissotriton schmidtleri	Bulgaria: Momina Salza 3	41.6117	25.539	Personal database	GPS	437
Lissotriton schmidtleri	Bulgaria: Nanovitsa	41.5461	25.5559	Personal database	GPS	308
Lissotriton schmidtleri	Bulgaria: Obichnik 1	41.4883	25.4881	Personal database	GPS	480
Lissotriton schmidtleri	Bulgaria: Obichnik 2	41.4885	25.4797	Personal database	GPS	555
Lissotriton schmidtleri	Bulgaria: Obichnik 3	41.4889	25.4735	Personal database	GPS	632
Lissotriton schmidtleri	Bulgaria: Odrinci	41.4139	26.1248	Personal database	GPS	67
Lissotriton schmidtleri	Bulgaria: Ostar Kamak	41.879	25.8526	Personal database	GPS	243
Lissotriton schmidtleri	Bulgaria: Ostar Kamak 1	41.8776	25.8402	Personal database	GPS	256
Lissotriton schmidtleri	Bulgaria: Ostar Kamak 11	41.8862	25.8618	Personal database	GPS	242
Lissotriton schmidtleri	Bulgaria: Ostar Kamak 14	41.8902	25.8802	Personal database	GPS	244
Lissotriton schmidtleri	Bulgaria: Ostar Kamak 15	41.9081	25.8802	Personal database	GPS	204
Lissotriton schmidtleri	Bulgaria: Ostar Kamak 2	41.8779	25.8598	Personal database	GPS	204
Lissotriton schmidtleri	Bulgaria: Ostar Kamak 5	41.8814	25.8346	Personal database	GPS	256
Lissotriton schmidtleri	Bulgaria: Ostar Kamak 8	41.8843	25.834	Personal database	GPS	231
Lissotriton schmidtleri	Bulgaria: Ostar Kamak 9	41.8848	25.8433	Personal database	GPS	211
Lissotriton schmidtleri	Bulgaria: Ostar Kamak2	41.881	25.85	Personal database	GPS	243
Lissotriton schmidtleri	Bulgaria: Ostrovitsa	41.611	25.4277	Personal database	GPS	218
Lissotriton schmidtleri	Bulgaria: Perla 2	42.2868	27.7493	Personal database	GPS	28
Lissotriton schmidtleri	Bulgaria: Piyavets 1	41.4894	25.4482	Personal database	GPS	473
Lissotriton schmidtleri	Bulgaria: Piyavets 2	41.4895	25.4551	Personal database	GPS	501
Lissotriton schmidtleri	Bulgaria: Piyavets 3	41.4933	25.4468	Personal database	GPS	527
Lissotriton schmidtleri	Bulgaria: Piyavets 4	41.4935	25.468	Personal database	GPS	567
Lissotriton schmidtleri	Bulgaria: Piyavets 5	41.4959	25.459	Personal database	GPS	560
Lissotriton schmidtleri	Bulgaria: Piyavets 6	41.4979	25.4542	Personal database	GPS	422
Lissotriton schmidtleri	Bulgaria: Pobeda 1	42.4412	26.6594	Personal database	GPS	296
Lissotriton schmidtleri	Bulgaria: Pobeda 2	42.4531	26.6489	Personal database	GPS	374
Lissotriton schmidtleri	Bulgaria: Primorsko	42.2667	27.7583	Personal database	Google Earth	14
Lissotriton schmidtleri	Bulgaria: Primorsko 1	42.2475	27.7521	Personal database	GPS	6
Lissotriton schmidtleri	Bulgaria: Primorsko 2	42.2833	27.7521	Personal database	GPS	0
Lissotriton schmidtleri	Bulgaria: Radovets 1	41.9276	26.4725	Personal database	GPS	262
Lissotriton schmidtleri	Bulgaria: Radovets 2	41.9539	26.527	Personal database	GPS	181
Lissotriton schmidtleri	Bulgaria: Raven	41.5622	25.5169	Personal database	GPS	328
Lissotriton schmidtleri	Bulgaria: Ravna Gora	41.868	26.3454	Personal database	GPS	369
Lissotriton schmidtleri	Bulgaria: Ravnets	42.5069	27.2552	Personal database	GPS	34
Lissotriton schmidtleri	Bulgaria: Rezovo 1	42.0222	28.0089	Personal database	GPS	5
Lissotriton schmidtleri	Bulgaria: Rezovo 2	42.0224	28.0021	Personal database	GPS	20
Lissotriton schmidtleri	Bulgaria: Rogozino 1	41.9153	25.9865	Personal database	GPS	131
Lissotriton schmidtleri	Bulgaria: Rogozino 2	41.9186	25.9884	Personal database	GPS	130
Lissotriton schmidtleri	Bulgaria: Ropotamo	42.3005	27.7291	Personal database	GPS	53
Lissotriton schmidtleri	Bulgaria: Sbor 1	41.5476	25.7448	Personal database	GPS	386
Lissotriton schmidtleri	Bulgaria: Sbor 2	41.5496	25.739	Personal database	GPS	425
Lissotriton schmidtleri	Bulgaria: Sbor 3	41.5557	25.7387	Personal database	GPS	425
Lissotriton schmidtleri	Bulgaria: Sedlovina	41.638	25.4336	Personal database	GPS	265
Lissotriton schmidtleri	Bulgaria: Senoklas	41.6043	25.9004	Personal database	GPS	420
Lissotriton schmidtleri	Bulgaria: Shiroko Pole	41.6292	25.4616	Personal database	GPS	294
Lissotriton schmidtleri	Bulgaria: Shishmantsi	42.244	25.0095	Personal database	GPS	170
Lissotriton schmidtleri	Bulgaria: Shtit 1	41.8452	26.342	Personal database	GPS	256
Lissotriton schmidtleri	Bulgaria: Shtit 2	41.8466	26.3669	Personal database	GPS	328
Lissotriton schmidtleri	Bulgaria: Sindeltsi	41.4752	25.5745	Personal database	GPS	311
Lissotriton schmidtleri	Bulgaria: Sinemorets	42.0496	27.9763	Personal database	GPS	37
Lissotriton schmidtleri	Bulgaria: Sirakovo	41.8949	25.3645	Personal database	GPS	335
Lissotriton schmidtleri	Bulgaria: Skalak	41.4359	25.6443	Personal database	GPS	290
Lissotriton schmidtleri	Bulgaria: Sladkodum	41.5805	25.7307	Personal database	GPS	315
Lissotriton schmidtleri	Bulgaria: Slivarka	41.4702	25.7051	Personal database	GPS	481
Lissotriton schmidtleri	Bulgaria: Sokolino 1	41.5041	25.4478	Personal database	GPS	347
Lissotriton schmidtleri	Bulgaria: Sokolino 2	41.5062	25.4578	Personal database	GPS	371
Lissotriton schmidtleri	Bulgaria: Sokolino 3	41.509	25.4466	Personal database	GPS	456
Lissotriton schmidtleri	Bulgaria: Sokolino 4	41.5133	25.4501	Personal database	GPS	517
Lissotriton schmidtleri	Bulgaria: Sozopol	42.3969	27.699	Personal database	GPS	52
Lissotriton schmidtleri	Bulgaria: Srem	42.0642	26.5035	Personal database	GPS	85
Lissotriton schmidtleri	Bulgaria: Stara Zagora	42.4348	25.6667	Personal database	GPS	218
Lissotriton schmidtleri	Bulgaria: Stoilovo	42.0182	27.5948	Personal database	GPS	190
Lissotriton schmidtleri	Bulgaria: Strazhets 1	41.3519	25.843	Personal database	GPS	635
Lissotriton schmidtleri	Bulgaria: Strazhets 2	41.3678	25.8902	Personal database	GPS	524
Lissotriton schmidtleri	Bulgaria: Strazhets 3	41.3807	25.8662	Personal database	GPS	452
Lissotriton schmidtleri	Bulgaria: Studen Kladenets 1	41.6011	25.6383	Personal database	GPS	207
Lissotriton schmidtleri	Bulgaria: Studen Kladenets 2	41.602	25.6457	Personal database	GPS	211
Lissotriton schmidtleri	Bulgaria: Studen Kladenets 3	41.6163	25.6453	Personal database	GPS	221
Lissotriton schmidtleri	Bulgaria: Svirets	41.5366	25.6199	Personal database	GPS	345
Lissotriton schmidtleri	Bulgaria: Tamarino	42.4025	26.7495	Personal database	GPS	329
Lissotriton schmidtleri	Bulgaria: Tatul 1	41.5433	25.5402	Personal database	GPS	427
Lissotriton schmidtleri	Bulgaria: Tatul 2	41.5463	25.5473	Personal database	GPS	408
Lissotriton schmidtleri	Bulgaria: Tatul 3	41.5509	25.5514	Personal database	GPS	394
Lissotriton schmidtleri	Bulgaria: Tatul 4	41.5568	25.5372	Personal database	GPS	423
Lissotriton schmidtleri	Bulgaria: Tenevo	42.3606	26.5468	Personal database	GPS	121
Lissotriton schmidtleri	Bulgaria: Tsarevo	42.1745	27.8465	Personal database	GPS	33
Lissotriton schmidtleri	Bulgaria: Tsarkvitsa	41.5665	25.5573	Personal database	GPS	288
Lissotriton schmidtleri	Bulgaria: Tulovo	42.562	25.5456	Personal database	GPS	313
Lissotriton schmidtleri	Bulgaria: Tulovo 2	42.5697	25.552	Personal database	GPS	320
Lissotriton schmidtleri	Bulgaria: Tvarditsa	42.4127	27.4442	Personal database	GPS	57
Lissotriton schmidtleri	Bulgaria: Valchi Izvor	42.1487	26.9568	Personal database	GPS	360
Lissotriton schmidtleri	Bulgaria: Varovnik	42.2137	27.2251	Personal database	GPS	367
Lissotriton schmidtleri	Bulgaria: Varvara	42.1167	27.8831	Personal database	GPS	141
Lissotriton schmidtleri	Bulgaria: Voden	42.0645	26.8768	Personal database	GPS	311
Lissotriton schmidtleri	Bulgaria: Yasna Polyana	42.2705	27.5956	Personal database	GPS	44
Lissotriton schmidtleri	Bulgaria: Zhelyazkovo	42.1339	26.9831	Personal database	GPS	310
Lissotriton schmidtleri	Bulgaria: Zornitsa 1	41.6234	25.5366	Personal database	GPS	450
Lissotriton schmidtleri	Bulgaria: Zornitsa 2	41.6237	25.5452	Personal database	GPS	466
Lissotriton schmidtleri	Bulgaria: Zornitsa 3	41.631	25.5342	Personal database	GPS	302
Lissotriton schmidtleri	Bulgaria: Zvezdel	41.4772	25.5323	Personal database	GPS	650
Lissotriton schmidtleri	Bulgaria: Harmanli 2	41.9238	25.9055	Buresch & Zonkov (1941)	Google Earth	104
Lissotriton schmidtleri	Bulgaria: Kirilovets	41.9078	25.6341	Buresch & Zonkov (1941)	Google Earth	164
Lissotriton schmidtleri	Bulgaria: Kyupria	42.259	27.7414	Buresch & Zonkov (1941)	Google Earth	11
Lissotriton schmidtleri	Bulgaria: Svilengrad	41.7642	26.2021	Buresch & Zonkov (1941)	Google Earth	56
Lissotriton schmidtleri	Bulgaria: Telets	42.337	26.7385	Buresch & Zonkov (1941)	Google Earth	188
Lissotriton schmidtleri	Bulgaria: Sokolitsa River	42.0519	26.2358	Chlebicki (1985)	Google Earth	310
Lissotriton schmidtleri	Bulgaria: Haskovo	41.921	25.5562	Kovachev (1917)	Google Earth	248
Lissotriton schmidtleri	Bulgaria: Harmanli 1	41.9236	25.8539	Obst (1973)	Google Earth	188
Lissotriton schmidtleri	Bulgaria: Tankovo	41.7279	25.761	Petrov (2004)	Google Earth	432
Lissotriton schmidtleri	Bulgaria: Arda Hut	41.6351	25.9791	Petrov et al. (2001)	Google Earth	180
Lissotriton schmidtleri	Bulgaria: Between Strazhets and Gorni Yurutsi	41.3578	25.8974	Petrov et al. (2001)	Google Earth	790
Lissotriton schmidtleri	Bulgaria: Bezhantsi	41.3577	25.9474	Petrov et al. (2001)	Google Earth	420
Lissotriton schmidtleri	Bulgaria: Chukovo	41.4887	25.4324	Petrov et al. (2001)	Google Earth	299
Lissotriton schmidtleri	Bulgaria: Oreshinsko Dere Valley	41.4436	26.1162	Petrov et al. (2001)	Google Earth	132
Lissotriton schmidtleri	Bulgaria: Plovka	41.4	25.472	Petrov et al. (2001)	Google Earth	510
Lissotriton schmidtleri	Bulgaria: Sredna Arda Station	41.6378	25.5119	Petrov et al. (2001)	Google Earth	241
Lissotriton schmidtleri	Bulgaria: Svirachi	41.4771	26.1155	Petrov et al. (2001)	Google Earth	274
Lissotriton schmidtleri	Bulgaria: Zandana Cave	41.6188	25.7205	Petrov et al. (2001)	Google Earth	207
Lissotriton schmidtleri	Bulgaria: Momchilgrad	41.5247	25.4091	Rehák (1983)	Google Earth	281
Lissotriton schmidtleri	Bulgaria: Voden	42.0529	26.9131	Stoev (2000)	Google Earth	303
Lissotriton schmidtleri	Bulgaria: Momina Skala Protected Area	41.6302	25.8342	Stoychev & Petrova (2003)	Google Earth	603
Lissotriton schmidtleri	Bulgaria: Ribino Protected Area	41.4095	25.5293	Stoychev & Petrova (2003)	Google Earth	399
Lissotriton schmidtleri	Bulgaria: Sredna Arda Protected Area	41.6399	25.5006	Stoychev & Petrova (2003)	Google Earth	295
Lissotriton schmidtleri	Bulgaria: Arkutino Swamp	42.3294	27.7249	Stoyneva & Michev (2007)	Google Earth	10
Lissotriton schmidtleri	Greece: Aghios Kosmas	41.0839	24.6707	Personal database	GPS	437
Lissotriton schmidtleri	Greece: Dadía	41.1071	26.2425	Personal database	GPS	97
Lissotriton schmidtleri	Greece: Evros-Feres	40.8588	26.1838	Personal database	GPS	5
Lissotriton schmidtleri	Greece: Evros-Lira	41.0748	26.2659	Personal database	GPS	20
Lissotriton schmidtleri	Greece: Gravuna	41.0077	24.6776	Personal database	GPS	20
Lissotriton schmidtleri	Greece: Therma	40.4962	25.6142	Personal database	GPS	38
Lissotriton schmidtleri	Greece: Zarkadia	41.0186	24.6467	Personal database	GPS	164
Lissotriton schmidtleri	Greece: 020	41.113	26.0368	Personal database	GPS	608
Lissotriton schmidtleri	Greece: 021	41.1184	26.0431	Personal database	GPS	509
Lissotriton schmidtleri	Greece: 022	40.8651	26.0455	Personal database	GPS	94
Lissotriton schmidtleri	Greece: 023	41.1272	26.0487	Personal database	GPS	581
Lissotriton schmidtleri	Greece: 024	41.0978	26.102	Personal database	GPS	345
Lissotriton schmidtleri	Greece: 025	41.0985	26.1023	Personal database	GPS	345
Lissotriton schmidtleri	Greece: 026	41.0237	26.1134	Personal database	GPS	208
Lissotriton schmidtleri	Greece: 027	40.8479	26.1224	Personal database	GPS	4
Lissotriton schmidtleri	Greece: 028	41.1204	26.1476	Personal database	GPS	303
Lissotriton schmidtleri	Greece: 029	41.0998	26.1613	Personal database	GPS	272
Lissotriton schmidtleri	Greece: 030	41.1002	26.1628	Personal database	GPS	272
Lissotriton schmidtleri	Greece: 031	41.1003	26.163	Personal database	GPS	272
Lissotriton schmidtleri	Greece: 032	41.0361	26.1737	Personal database	GPS	193
Lissotriton schmidtleri	Greece: 033	41.036	26.1738	Personal database	GPS	193
Lissotriton schmidtleri	Greece: 034	41.0357	26.174	Personal database	GPS	193
Lissotriton schmidtleri	Greece: 035	41.0339	26.176	Personal database	GPS	226
Lissotriton schmidtleri	Greece: 036	41.0332	26.1771	Personal database	GPS	175
Lissotriton schmidtleri	Greece: 037	41.033	26.1771	Personal database	GPS	175
Lissotriton schmidtleri	Greece: 038	41.033	26.1774	Personal database	GPS	175
Lissotriton schmidtleri	Greece: 039	41.1048	26.187	Personal database	GPS	217
Lissotriton schmidtleri	Greece: 040	41.2039	26.1893	Personal database	GPS	256
Lissotriton schmidtleri	Greece: 041	41.2038	26.1895	Personal database	GPS	256
Lissotriton schmidtleri	Greece: 042	41.1015	26.2004	Personal database	GPS	152
Lissotriton schmidtleri	Greece: 043	41.1017	26.2007	Personal database	GPS	152
Lissotriton schmidtleri	Greece: 044	41.1087	26.2122	Personal database	GPS	160
Lissotriton schmidtleri	Greece: 045	41.1427	26.2233	Personal database	GPS	47
Lissotriton schmidtleri	Greece: 046	41.2109	26.2242	Personal database	GPS	167
Lissotriton schmidtleri	Greece: 047	41.2111	26.2244	Personal database	GPS	167
Lissotriton schmidtleri	Greece: 048	41.2104	26.2245	Personal database	GPS	167
Lissotriton schmidtleri	Greece: 049	41.211	26.2253	Personal database	GPS	204
Lissotriton schmidtleri	Greece: 050	41.2121	26.2329	Personal database	GPS	204
Lissotriton schmidtleri	Greece: Thyrea	41.4167	26.5333	Çördük et al. (2017)	Literature	84
Lissotriton schmidtleri	Turkey: Akköy	39.806	27.183	Personal database	GPS	250
Lissotriton schmidtleri	Turkey: Sarıcaali	41.4171	27.2233	Personal database	GPS	52
Lissotriton schmidtleri	Turkey: Akçakıl	39.889	26.704	Bozkurt et al. (2016)	GPS	251
Lissotriton schmidtleri	Turkey: Evciler	39.787	26.76	Bozkurt et al. (2016)	GPS	203
Lissotriton schmidtleri	Turkey: Bozcaada	39.8333	26.0167	Çördük et al. (2017)	Literature	42
Lissotriton schmidtleri	Turkey: Çanakkale	40.1	26.4	Çördük et al. (2017)	Literature	15
Lissotriton schmidtleri	Turkey: Kavakkoy	40.6	26.8333	Çördük et al. (2017)	Literature	n/a
Lissotriton schmidtleri	Turkey: Gölcük	38.307	27.991	Wielstra et al. (2015)	GPS	1034
Lissotriton schmidtleri	Turkey: Durusu	41.292	28.666	Wielstra et al. (2015)	GPS	46
Lissotriton schmidtleri	Turkey: Dursun Köy	41.207	28.642	Wielstra et al. (2015)	GPS	60
Lissotriton schmidtleri	Turkey: Çanakça Köyü	41.25	28.485	Wielstra et al. (2015)	GPS	102
Lissotriton schmidtleri	Turkey: Yeşilbayır	41.139	28.593	Wielstra et al. (2015)	GPS	48
Lissotriton schmidtleri	Turkey: Akçalar	40.173	28.738	Wielstra et al. (2015)	GPS	21
Lissotriton schmidtleri	Turkey: Dorak Köyü	40.1	28.587	Wielstra et al. (2015)	GPS	169
Lissotriton schmidtleri	Turkey: Eskikızılelma	40.034	28.726	Wielstra et al. (2015)	GPS	477
Lissotriton schmidtleri	Turkey: Söğütalan	40.062	28.579	Wielstra et al. (2015)	GPS	232
Lissotriton schmidtleri	Turkey: Bozdağ	38.379	28.08	Wielstra et al. (2015)	Google earth	1067
Lissotriton schmidtleri	Turkey: Türkmen Köyü	38.749	27.183	Wielstra et al. (2015)	Google earth	354
Lissotriton schmidtleri	Turkey: Ayvacık	39.594	26.404	Wielstra et al. (2015)	Google earth	261
Lissotriton schmidtleri	Turkey: Gemlik	40.426	29.191	Wielstra et al. (2015)	Google earth	36
Lissotriton schmidtleri	Turkey: Susurluk	39.9	28.161	Wielstra et al. (2015)	Google earth	56
Lissotriton schmidtleri	Turkey: Ezine	39.738	26.366	Wielstra et al. (2015)	Google earth	65
Lissotriton schmidtleri	Turkey: Hayrabolu	41.208	27.118	Wielstra et al. (2015)	Google earth	42
Lissotriton schmidtleri	Turkey: Gelibolu	40.606	26.875	Wielstra et al. (2015)	Google earth	24
Lissotriton schmidtleri	Turkey: Sazlıdere	40.66	26.691	Wielstra et al. (2015)	Google earth	88
Lissotriton schmidtleri	Turkey: Ahmetbeyli	38.005	27.193	Wielstra et al. (2015)	Google earth	44
Lissotriton schmidtleri	Turkey: İnkaya Köyü	40.301	28.561	Wielstra et al. (2015)	Google earth	17
Lissotriton schmidtleri	Turkey: Suuçtu Şelalesi	39.9	28.383	Wielstra et al. (2015)	Google earth	495
Lissotriton schmidtleri	Turkey: Keşan	40.917	26.633	Wielstra et al. (2015)	GPS	122
Lissotriton schmidtleri	Turkey: Kurudere	38.56	27.218	Wielstra et al. (2015)	GPS	836
Lissotriton schmidtleri	Turkey: Çaltilidere	38.847	27.019	Wielstra et al. (2015)	GPS	10
Lissotriton schmidtleri	Turkey: Bozköy	39.024	27.111	Wielstra et al. (2015)	GPS	151
Lissotriton schmidtleri	Turkey: Sapanca	39.641	26.402	Wielstra et al. (2015)	GPS	257
Lissotriton schmidtleri	Turkey: Bahçeli	39.664	26.392	Wielstra et al. (2015)	GPS	137
Lissotriton schmidtleri	Turkey: Ezine	39.753	26.37	Wielstra et al. (2015)	GPS	67
Lissotriton schmidtleri	Turkey: Gökçali	39.942	26.296	Wielstra et al. (2015)	GPS	88
Lissotriton schmidtleri	Turkey: Çavuşköy	39.774	26.46	Wielstra et al. (2015)	GPS	66
Lissotriton schmidtleri	Turkey: Karakadılar	40.01	26.94	Wielstra et al. (2015)	GPS	144
Lissotriton schmidtleri	Turkey: Çifteçeşmeler	40.289	27.576	Wielstra et al. (2015)	GPS	22
Lissotriton schmidtleri	Turkey: Sarıköy	40.217	27.619	Wielstra et al. (2015)	GPS	64
Lissotriton schmidtleri	Turkey: Çvş	40.258	28.111	Wielstra et al. (2015)	GPS	28
Lissotriton schmidtleri	Turkey: Harmanlı	40.228	28.451	Wielstra et al. (2015)	GPS	16
Lissotriton schmidtleri	Turkey: Subaşi	40.26	28.536	Wielstra et al. (2015)	GPS	219
Lissotriton schmidtleri	Turkey: Derecik	40.071	28.353	Wielstra et al. (2015)	GPS	14
Lissotriton schmidtleri	Turkey: Kocabey	39.352	28.217	Wielstra et al. (2015)	GPS	534
Lissotriton schmidtleri	Turkey: Kapaklı	38.873	27.749	Wielstra et al. (2015)	GPS	83
Lissotriton schmidtleri	Turkey: Havalimani Airport	38.28	27.148	Wielstra et al. (2015)	GPS	128
Lissotriton schmidtleri	Turkey: Troie	39.958	26.238	Wielstra et al. (2015)	GPS	36
Lissotriton schmidtleri	Turkey: Bezirganlar	39.902	26.736	Wielstra et al. (2015)	GPS	215
Lissotriton schmidtleri	Turkey: Hacıkasım	39.965	26.828	Wielstra et al. (2015)	GPS	260
Lissotriton schmidtleri	Turkey: Karakoca	40.238	28.551	Wielstra et al. (2015)	GPS	113
Lissotriton schmidtleri	Turkey: Esence	40.337	28.674	Wielstra et al. (2015)	GPS	147
Lissotriton schmidtleri	Turkey: Hürriyet	40.276	28.65	Wielstra et al. (2015)	GPS	32
Lissotriton schmidtleri	Turkey: Yalıçiftlik	40.346	28.719	Wielstra et al. (2015)	GPS	146
Lissotriton schmidtleri	Turkey: Küçükyenice	40.276	28.844	Wielstra et al. (2015)	GPS	67
Lissotriton schmidtleri	Turkey: Cevaplı	39.034	27.15	Wielstra et al. (2015)	GPS	54
Lissotriton schmidtleri	Turkey: Naipli	39.651	27.764	Wielstra et al. (2015)	GPS	284
Lissotriton schmidtleri	Turkey: Ortaköy	38.742	27.218	Wielstra et al. (2015)	GPS	298
Lissotriton schmidtleri	Turkey: Bahçeli	39.676	26.391	Wielstra et al. (2015)	GPS	114
Lissotriton schmidtleri	Turkey: Sülüklu	38.565	27.533	Wielstra et al. (2015)	GPS	420
Lissotriton schmidtleri	Turkey: İkizgöller	38.517	27.226	Wielstra et al. (2015)	Google earth	621
Lissotriton schmidtleri	Turkey: Baltalimanı	41.096	29.053	Wielstra et al. (2015)	Google earth	4
Lissotriton schmidtleri	Turkey: Efes	37.943	27.334	Wielstra et al. (2015)	Google earth	4
Lissotriton schmidtleri	Turkey: Lapseki	40.339	26.693	Wielstra et al. (2015)	Google earth	21
Lissotriton schmidtleri	Turkey: Bolayır	40.523	26.76	Wielstra et al. (2015)	Google earth	55
Lissotriton schmidtleri	Turkey: Karacabey	40.2	28.367	Wielstra et al. (2015)	Literature	7
Lissotriton schmidtleri	Turkey: Manisa	38.767	27.333	Wielstra et al. (2015)	Literature	372
Lissotriton schmidtleri	Turkey: Uzunköprü	41.281	26.7	Wielstra et al. (2015)	Google earth	19
Lissotriton schmidtleri	Turkey: Ürünlü Köyü	41.674	27.072	Wielstra et al. (2015)	Google earth	92
Lissotriton schmidtleri	Turkey: Pehlivanköy	41.345	26.923	Wielstra et al. (2015)	Google earth	27
Lissotriton schmidtleri	Turkey: Dereköy	41.153	26.667	Wielstra et al. (2015)	Google earth	77
Lissotriton schmidtleri	Turkey: Lüleburgaz 1	41.405	27.318	Wielstra et al. (2015)	Google earth	91
Lissotriton schmidtleri	Turkey: Lüleburgaz 2	41.349	27.29	Wielstra et al. (2015)	Google earth	37
Lissotriton schmidtleri	Turkey: Çatalca	41.147	28.468	Wielstra et al. (2015)	Google earth	39
Lissotriton schmidtleri	Turkey: Yassıviran	41.239	28.595	Wielstra et al. (2015)	Google earth	159
Lissotriton schmidtleri	Turkey: Çilingirköy	41.184	28.68	Wielstra et al. (2015)	Google earth	115
Lissotriton schmidtleri	Turkey: Arnavutköy	41.2	28.737	Wielstra et al. (2015)	Google earth	108
Lissotriton schmidtleri	Turkey: Kısırmandra	41.154	28.901	Wielstra et al. (2015)	Google earth	31
Lissotriton schmidtleri	Turkey: Habibler	41.125	28.841	Wielstra et al. (2015)	Google earth	199
Lissotriton schmidtleri	Turkey: Şeytan Deresi	41.249	29.044	Wielstra et al. (2015)	Google earth	57
Lissotriton schmidtleri	Turkey: Belgrad Ormanı	41.158	28.943	Wielstra et al. (2015)	Google earth	110
Lissotriton schmidtleri	Turkey: Altınşehir	41.057	28.746	Wielstra et al. (2015)	Google earth	-1
Lissotriton schmidtleri	Turkey: Küçükçekmece	41.008	28.773	Wielstra et al. (2015)	Google earth	-1
Lissotriton schmidtleri	Turkey: Saray	41.444	27.96	Wielstra et al. (2015)	Google earth	172
Lissotriton schmidtleri	Turkey: Naipler	40.873	27.42	Wielstra et al. (2015)	Google earth	37
Lissotriton vulgaris	Austria: 32TPT4	47.1559	11.3096	Sillero et al. (2014)	Center grid	1662
Lissotriton vulgaris	Austria: 32TQT1	47.5917	12.001	Sillero et al. (2014)	Center grid	1242
Lissotriton vulgaris	Austria: 33TUM1	46.7064	12.7116	Sillero et al. (2014)	Center grid	1150
Lissotriton vulgaris	Austria: 33TUN1	47.6054	12.6727	Sillero et al. (2014)	Center grid	1261
Lissotriton vulgaris	Austria: 33TUN2	47.1559	12.6924	Sillero et al. (2014)	Center grid	2263
Lissotriton vulgaris	Austria: 33TUN3	47.617	13.3376	Sillero et al. (2014)	Center grid	804
Lissotriton vulgaris	Austria: 33TUN4	47.1673	13.3517	Sillero et al. (2014)	Center grid	1808
Lissotriton vulgaris	Austria: 33TVM1	46.725	14.0195	Sillero et al. (2014)	Center grid	868
Lissotriton vulgaris	Austria: 33TVM3	46.7288	14.6738	Sillero et al. (2014)	Center grid	1177
Lissotriton vulgaris	Austria: 33TVN1	47.6247	14.0028	Sillero et al. (2014)	Center grid	2050
Lissotriton vulgaris	Austria: 33TVN2	47.1749	14.0112	Sillero et al. (2014)	Center grid	1069
Lissotriton vulgaris	Austria: 33TVN3	47.6286	14.6682	Sillero et al. (2014)	Center grid	1071
Lissotriton vulgaris	Austria: 33TVN4	47.1787	14.671	Sillero et al. (2014)	Center grid	692
Lissotriton vulgaris	Austria: 33TWM1	46.7288	15.3281	Sillero et al. (2014)	Center grid	346
Lissotriton vulgaris	Austria: 33TWN1	47.6286	15.3337	Sillero et al. (2014)	Center grid	1393
Lissotriton vulgaris	Austria: 33TWN2	47.1787	15.3309	Sillero et al. (2014)	Center grid	392
Lissotriton vulgaris	Austria: 33TWN3	47.6247	15.9991	Sillero et al. (2014)	Center grid	955
Lissotriton vulgaris	Austria: 33TWN4	47.1749	15.9907	Sillero et al. (2014)	Center grid	295
Lissotriton vulgaris	Austria: 33UUP4	48.0667	13.3231	Sillero et al. (2014)	Center grid	650
Lissotriton vulgaris	Austria: 33UVP2	48.0745	13.9941	Sillero et al. (2014)	Center grid	398
Lissotriton vulgaris	Austria: 33UVP4	48.0784	14.6653	Sillero et al. (2014)	Center grid	340
Lissotriton vulgaris	Austria: 33UWP1	48.5282	15.3396	Sillero et al. (2014)	Center grid	683
Lissotriton vulgaris	Austria: 33UWP2	48.0784	15.3366	Sillero et al. (2014)	Center grid	372
Lissotriton vulgaris	Austria: 33UWP4	48.0745	16.0078	Sillero et al. (2014)	Center grid	486
Lissotriton vulgaris	Austria: 33UXP2	48.0667	16.6788	Sillero et al. (2014)	Center grid	203
Lissotriton vulgaris	Belarus: 35UMV4	53.4737	26.6241	Sillero et al. (2014)	Center grid	184
Lissotriton vulgaris	Belarus: 35UNT1	52.1254	27.3659	Sillero et al. (2014)	Center grid	123
Lissotriton vulgaris	Belarus: 35UPA1	54.8068	28.9456	Sillero et al. (2014)	Center grid	238
Lissotriton vulgaris	Belarus: 35UPA3	54.7914	29.6674	Sillero et al. (2014)	Center grid	196
Lissotriton vulgaris	Belarus: 35UPT1	52.1118	28.8261	Sillero et al. (2014)	Center grid	119
Lissotriton vulgaris	Belarus: 35UPV2	53.4595	28.8834	Sillero et al. (2014)	Center grid	156
Lissotriton vulgaris	Belarus: 36UUC1	52.0958	30.4055	Sillero et al. (2014)	Center grid	126
Lissotriton vulgaris	Belarus: 36UUC3	52.1118	31.1751	Sillero et al. (2014)	Center grid	147
Lissotriton vulgaris	Belarus: 34UFC4	51.6465	23.5851	Sillero et al. (2014)	Center grid	167
Lissotriton vulgaris	Belarus: 34UFD4	52.5452	23.6071	Sillero et al. (2014)	Center grid	151
Lissotriton vulgaris	Belarus: 34UFE3	53.8931	23.6424	Sillero et al. (2014)	Center grid	99
Lissotriton vulgaris	Belarus: 35ULT1	52.0959	24.4056	Sillero et al. (2014)	Center grid	142
Lissotriton vulgaris	Belarus: 35ULT3	52.1118	25.1753	Sillero et al. (2014)	Center grid	144
Lissotriton vulgaris	Belarus: 35ULU2	52.5452	24.3945	Sillero et al. (2014)	Center grid	170
Lissotriton vulgaris	Belarus: 35ULV1	53.8931	24.3592	Sillero et al. (2014)	Center grid	126
Lissotriton vulgaris	Belarus: 35ULV2	53.4438	24.3713	Sillero et al. (2014)	Center grid	111
Lissotriton vulgaris	Belarus: 35UMA1	54.8168	25.8336	Sillero et al. (2014)	Center grid	123
Lissotriton vulgaris	Belarus: 35UMA3	54.8218	26.6117	Sillero et al. (2014)	Center grid	183
Lissotriton vulgaris	Belarus: 35UMA4	54.3725	26.6159	Sillero et al. (2014)	Center grid	149
Lissotriton vulgaris	Belarus: 35UMT1	52.1209	25.9053	Sillero et al. (2014)	Center grid	154
Lissotriton vulgaris	Belarus: 35UMU1	53.0197	25.8827	Sillero et al. (2014)	Center grid	192
Lissotriton vulgaris	Belarus: 35UMU2	52.5703	25.8941	Sillero et al. (2014)	Center grid	157
Lissotriton vulgaris	Belarus: 35UNA2	54.3725	27.3856	Sillero et al. (2014)	Center grid	217
Lissotriton vulgaris	Belarus: 35UNA3	54.8168	28.1679	Sillero et al. (2014)	Center grid	170
Lissotriton vulgaris	Belarus: 35UNB2	55.2711	27.3942	Sillero et al. (2014)	Center grid	140
Lissotriton vulgaris	Belarus: 35UNT2	51.6758	27.3622	Sillero et al. (2014)	Center grid	141
Lissotriton vulgaris	Belarus: 35UNT3	52.1208	28.0961	Sillero et al. (2014)	Center grid	121
Lissotriton vulgaris	Belarus: 35UNT4	51.6714	28.0852	Sillero et al. (2014)	Center grid	142
Lissotriton vulgaris	Belarus: 35UNU3	53.0196	28.1188	Sillero et al. (2014)	Center grid	161
Lissotriton vulgaris	Belarus: 35UNV1	53.9231	27.3814	Sillero et al. (2014)	Center grid	233
Lissotriton vulgaris	Belarus: 35UNV2	53.4737	27.3774	Sillero et al. (2014)	Center grid	189
Lissotriton vulgaris	Belarus: 35UNV3	53.9183	28.1426	Sillero et al. (2014)	Center grid	191
Lissotriton vulgaris	Belarus: 35UNV4	53.469	28.1305	Sillero et al. (2014)	Center grid	163
Lissotriton vulgaris	Belarus: 35UPB1	55.7049	28.9899	Sillero et al. (2014)	Center grid	150
Lissotriton vulgaris	Belarus: 35UPB2	55.2559	28.9674	Sillero et al. (2014)	Center grid	135
Lissotriton vulgaris	Belarus: 35UPT2	51.6625	28.808	Sillero et al. (2014)	Center grid	138
Lissotriton vulgaris	Belarus: 35UPT3	52.0958	29.5958	Sillero et al. (2014)	Center grid	129
Lissotriton vulgaris	Belarus: 35UPT4	51.6464	29.5849	Sillero et al. (2014)	Center grid	111
Lissotriton vulgaris	Belarus: 35UPV1	53.9087	28.9036	Sillero et al. (2014)	Center grid	168
Lissotriton vulgaris	Belarus: 36UUC2	51.6464	30.4163	Sillero et al. (2014)	Center grid	112
Lissotriton vulgaris	Belarus: 36UUD4	52.5611	31.1565	Sillero et al. (2014)	Center grid	117
Lissotriton vulgaris	Belarus: 36UUE1	53.893	30.359	Sillero et al. (2014)	Center grid	147
Lissotriton vulgaris	Belarus: 36UUE4	53.4595	31.1178	Sillero et al. (2014)	Center grid	128
Lissotriton vulgaris	Belarus: 36UUF1	54.7914	30.3339	Sillero et al. (2014)	Center grid	177
Lissotriton vulgaris	Belarus: 36UUF4	54.3578	31.077	Sillero et al. (2014)	Center grid	208
Lissotriton vulgaris	Belarus: 36UUG2	55.2405	30.3208	Sillero et al. (2014)	Center grid	143
Lissotriton vulgaris	Belarus: 36UVE2	53.469	31.8707	Sillero et al. (2014)	Center grid	167
Lissotriton vulgaris	Belgium: 31UDS3	51.2265	2.64332	Sillero et al. (2014)	Center grid	n/a
Lissotriton vulgaris	Belgium: 31UES1	51.2265	3.35935	Sillero et al. (2014)	Center grid	0
Lissotriton vulgaris	Belgium: 31UES2	50.7769	3.35589	Sillero et al. (2014)	Center grid	58
Lissotriton vulgaris	Belgium: 31UES3	51.2221	4.07529	Sillero et al. (2014)	Center grid	3
Lissotriton vulgaris	Belgium: 31UES4	50.7726	4.06494	Sillero et al. (2014)	Center grid	50
Lissotriton vulgaris	Belgium: 31UFR1	50.3145	4.75696	Sillero et al. (2014)	Center grid	261
Lissotriton vulgaris	Belgium: 31UFR3	50.2982	5.55455	Sillero et al. (2014)	Center grid	320
Lissotriton vulgaris	Belgium: 31UFR4	49.8525	5.43574	Sillero et al. (2014)	Center grid	426
Lissotriton vulgaris	Belgium: 31UFS1	51.2133	4.79095	Sillero et al. (2014)	Center grid	18
Lissotriton vulgaris	Belgium: 31UFS2	50.7639	4.77374	Sillero et al. (2014)	Center grid	100
Lissotriton vulgaris	Belgium: 31UFS3	51.1972	5.57495	Sillero et al. (2014)	Center grid	35
Lissotriton vulgaris	Belgium: 31UFS4	50.7477	5.56462	Sillero et al. (2014)	Center grid	113
Lissotriton vulgaris	Bosnia and Herzegovina: Han Pijesak	44.0958	18.9589	Personal database	GPS	1057
Lissotriton vulgaris	Bosnia and Herzegovina: Klupe	44.6014	17.6106	Personal database	GPS	685
Lissotriton vulgaris	Bosnia and Herzegovina: Sokolac	43.9356	18.8158	Personal database	GPS	885
Lissotriton vulgaris	Bosnia and Herzegovina: Bosansko Grahovo, Korana	44.1791	16.363	IBISS	Google Earth	860
Lissotriton vulgaris	Bosnia and Herzegovina: Glamoč	44.046	16.856	IBISS	Google Earth	949
Lissotriton vulgaris	Bosnia and Herzegovina: Igman	43.74	18.25	IBISS	Google Earth	1482
Lissotriton vulgaris	Bosnia and Herzegovina: Jelah	44.65	17.956	IBISS	Google Earth	181
Lissotriton vulgaris	Bosnia and Herzegovina: Kijevo	43.755	18.408	IBISS	Google Earth	619
Lissotriton vulgaris	Bosnia and Herzegovina: Kupres, Stožer	44.004	17.311	IBISS	Google Earth	1645
Lissotriton vulgaris	Bosnia and Herzegovina: Zelengora, Tjentište	43.354	18.546	IBISS	Google Earth	1709
Lissotriton vulgaris	Bosnia and Herzegovina: Romanija	43.9	18.75	Çördük et al. (2017)	Literature	929
Lissotriton vulgaris	Bosnia and Herzegovina: 33TYK1	44.894	17.7674	Sillero et al. (2014)	Center grid	125
Lissotriton vulgaris	Bosnia and Herzegovina: 34TBQ3	44.894	18.2342	Sillero et al. (2014)	Center grid	241
Lissotriton vulgaris	Bosnia and Herzegovina: 34TCQ2	44.4579	18.8011	Sillero et al. (2014)	Center grid	260
Lissotriton vulgaris	Bosnia and Herzegovina: 33TWK3	44.9252	15.9512	Sillero et al. (2014)	Center grid	370
Lissotriton vulgaris	Bosnia and Herzegovina: 34TBP3	43.9943	18.2535	Sillero et al. (2014)	Center grid	463
Lissotriton vulgaris	Bulgaria: Aldomirovtsi Swamp	42.8954	23.0056	Personal database	GPS	650
Lissotriton vulgaris	Bulgaria: Barlia	43.1281	22.9922	Personal database	GPS	1322
Lissotriton vulgaris	Bulgaria: Barlia 2	43.1352	23.0024	Personal database	GPS	1215
Lissotriton vulgaris	Bulgaria: Barlia 3	43.1354	22.9964	Personal database	GPS	1332
Lissotriton vulgaris	Bulgaria: Baykal	43.7077	24.4543	Personal database	GPS	24
Lissotriton vulgaris	Bulgaria: Baykalsko	42.3942	22.8089	Personal database	GPS	864
Lissotriton vulgaris	Bulgaria: Belene 1	43.6662	25.2326	Personal database	GPS	19
Lissotriton vulgaris	Bulgaria: Belene 2	43.6668	25.2417	Personal database	GPS	21
Lissotriton vulgaris	Bulgaria: Belene 3	43.6671	25.211	Personal database	GPS	18
Lissotriton vulgaris	Bulgaria: Belene 4	43.6697	25.1955	Personal database	GPS	20
Lissotriton vulgaris	Bulgaria: Bistritsa 1	42.5951	23.3491	Personal database	GPS	1000
Lissotriton vulgaris	Bulgaria: Bistritsa 2	42.6072	23.3709	Personal database	GPS	748
Lissotriton vulgaris	Bulgaria: Bogoina Mahala	42.8695	22.6566	Personal database	GPS	668
Lissotriton vulgaris	Bulgaria: Borovan	43.409	23.7694	Personal database	GPS	205
Lissotriton vulgaris	Bulgaria: Borovitsa	43.5903	22.7703	Personal database	GPS	228
Lissotriton vulgaris	Bulgaria: Botevgrad	42.891	23.7926	Personal database	GPS	394
Lissotriton vulgaris	Bulgaria: Bov	43.0192	23.437	Personal database	GPS	1230
Lissotriton vulgaris	Bulgaria: Brakyovtsi 1	43.0332	23.1324	Personal database	GPS	999
Lissotriton vulgaris	Bulgaria: Brakyovtsi 2	43.0769	23.1569	Personal database	GPS	1331
Lissotriton vulgaris	Bulgaria: Brakyovtsi 3	43.0863	23.1768	Personal database	GPS	1371
Lissotriton vulgaris	Bulgaria: Brakyovtsi 4	43.0971	23.1563	Personal database	GPS	1326
Lissotriton vulgaris	Bulgaria: Brakyovtsi 5	43.105	23.1605	Personal database	GPS	1382
Lissotriton vulgaris	Bulgaria: Brashlen 1	44.0068	26.3303	Personal database	GPS	12
Lissotriton vulgaris	Bulgaria: Brashlen 2	44.0101	26.3394	Personal database	GPS	12
Lissotriton vulgaris	Bulgaria: Brestovo	43.1627	24.9375	Personal database	GPS	432
Lissotriton vulgaris	Bulgaria: Darmanci	43.1167	23.7167	Personal database	Google Earth	370
Lissotriton vulgaris	Bulgaria: Devetaki	43.2336	24.8857	Personal database	GPS	140
Lissotriton vulgaris	Bulgaria: Dobri dol	43.7845	23.0232	Personal database	GPS	34
Lissotriton vulgaris	Bulgaria: Dobri Dol 2	43.7803	23.0098	Personal database	GPS	31
Lissotriton vulgaris	Bulgaria: Dolni Dabnik	43.404	24.48	Personal database	GPS	73
Lissotriton vulgaris	Bulgaria: Dolno Belotintsi 1	43.4357	23.2918	Personal database	GPS	232
Lissotriton vulgaris	Bulgaria: Dolno Belotintsi 2	43.4362	23.3251	Personal database	GPS	339
Lissotriton vulgaris	Bulgaria: Dragalevtsi 1	42.5855	23.2679	Personal database	GPS	1917
Lissotriton vulgaris	Bulgaria: Dragalevtsi 2	42.6361	23.2693	Personal database	GPS	966
Lissotriton vulgaris	Bulgaria: Dragichevo 1	42.6231	23.1541	Personal database	GPS	850
Lissotriton vulgaris	Bulgaria: Dragichevo 2	42.6269	23.1557	Personal database	GPS	937
Lissotriton vulgaris	Bulgaria: Dragoman	42.9387	22.9647	Personal database	GPS	705
Lissotriton vulgaris	Bulgaria: Dzhulyunitsa	43.1611	25.8796	Personal database	GPS	62
Lissotriton vulgaris	Bulgaria: Egalnitsa	42.463	22.8468	Personal database	GPS	653
Lissotriton vulgaris	Bulgaria: Enchevska Mahala	42.2528	22.6949	Personal database	GPS	650
Lissotriton vulgaris	Bulgaria: Garvan	44.1006	26.9018	Personal database	GPS	13
Lissotriton vulgaris	Bulgaria: German	42.5852	23.4491	Personal database	GPS	993
Lissotriton vulgaris	Bulgaria: Gintsi 1	43.0886	23.0732	Personal database	GPS	1336
Lissotriton vulgaris	Bulgaria: Gintsi 2	43.095	23.0774	Personal database	GPS	1403
Lissotriton vulgaris	Bulgaria: Glogovitsa	42.7663	22.6677	Personal database	GPS	1051
Lissotriton vulgaris	Bulgaria: Golema Fucha	42.3841	22.9519	Personal database	GPS	780
Lissotriton vulgaris	Bulgaria: Golemo Buchino	42.6315	23.1588	Personal database	GPS	934
Lissotriton vulgaris	Bulgaria: Golesh	43.0465	22.9474	Personal database	GPS	696
Lissotriton vulgaris	Bulgaria: Golets	43.035	24.5693	Personal database	GPS	400
Lissotriton vulgaris	Bulgaria: Gorski Senovets	43.266	25.902	Personal database	GPS	215
Lissotriton vulgaris	Bulgaria: Gromshin	43.5087	23.4791	Personal database	GPS	75
Lissotriton vulgaris	Bulgaria: Gubesh 1	43.0635	23.0266	Personal database	GPS	1269
Lissotriton vulgaris	Bulgaria: Gubesh 2	43.0659	23.0405	Personal database	GPS	1280
Lissotriton vulgaris	Bulgaria: Gubesh 3	43.074	23.0292	Personal database	GPS	1217
Lissotriton vulgaris	Bulgaria: Harlets	43.7106	23.8422	Personal database	GPS	28
Lissotriton vulgaris	Bulgaria: IBW 5721	42.5583	23.4268	Personal database	GPS	668
Lissotriton vulgaris	Bulgaria: Izgrev	43.5939	26.9769	Personal database	GPS	350
Lissotriton vulgaris	Bulgaria: Kakrina	43.0981	24.8927	Personal database	GPS	426
Lissotriton vulgaris	Bulgaria: Kakrina 2	43.1156	24.863	Personal database	GPS	504
Lissotriton vulgaris	Bulgaria: Karakashka Mahala	42.2027	22.6324	Personal database	GPS	1633
Lissotriton vulgaris	Bulgaria: Kireevo	43.789	22.4112	Personal database	GPS	375
Lissotriton vulgaris	Bulgaria: Kireevo	43.8292	22.3792	Personal database	GPS	462
Lissotriton vulgaris	Bulgaria: Kiselitsa	42.5373	22.522	Personal database	GPS	951
Lissotriton vulgaris	Bulgaria: Klisura	42.3336	23.3803	Personal database	GPS	1107
Lissotriton vulgaris	Bulgaria: Klisura 2	42.3542	23.3221	Personal database	GPS	1224
Lissotriton vulgaris	Bulgaria: Klisura Monastery	43.1837	23.2046	Personal database	GPS	499
Lissotriton vulgaris	Bulgaria: Kosovo	42.6277	22.5624	Personal database	GPS	890
Lissotriton vulgaris	Bulgaria: Lozen 1	42.5796	23.5098	Personal database	GPS	1092
Lissotriton vulgaris	Bulgaria: Lozen 2	42.5816	23.5069	Personal database	GPS	1084
Lissotriton vulgaris	Bulgaria: Malak Preslavets 1	44.0853	26.8371	Personal database	GPS	64
Lissotriton vulgaris	Bulgaria: Malak Preslavets 2	44.0999	26.8321	Personal database	GPS	11
Lissotriton vulgaris	Bulgaria: Mali Izvor	43.8141	27.4621	Personal database	GPS	172
Lissotriton vulgaris	Bulgaria: Milanovo	43.1322	23.3896	Personal database	GPS	978
Lissotriton vulgaris	Bulgaria: Momin Brod	43.786	23.2305	Personal database	GPS	43
Lissotriton vulgaris	Bulgaria: Montana	43.3954	23.2363	Personal database	GPS	148
Lissotriton vulgaris	Bulgaria: Nova Cherna 1	44.0127	26.4393	Personal database	GPS	14
Lissotriton vulgaris	Bulgaria: Nova Cherna 2	44.0184	26.4785	Personal database	GPS	14
Lissotriton vulgaris	Bulgaria: Novo Selo	42.191	22.6792	Personal database	GPS	878
Lissotriton vulgaris	Bulgaria: Ochindol	43.1395	23.4623	Personal database	GPS	1364
Lissotriton vulgaris	Bulgaria: Oeleyna	44.0298	22.6294	Personal database	GPS	93
Lissotriton vulgaris	Bulgaria: Orsoia	43.7845	23.0971	Personal database	GPS	28
Lissotriton vulgaris	Bulgaria: Petrohan Pass	43.1188	23.127	Personal database	GPS	1423
Lissotriton vulgaris	Bulgaria: Pisarovo	43.4052	24.2465	Personal database	GPS	97
Lissotriton vulgaris	Bulgaria: Plana 1	42.4685	23.4561	Personal database	GPS	1108
Lissotriton vulgaris	Bulgaria: Plana 2	42.5009	23.4078	Personal database	GPS	1295
Lissotriton vulgaris	Bulgaria: Portitovtsi	43.4958	23.3583	Personal database	GPS	95
Lissotriton vulgaris	Bulgaria: Pstrina Hill	43.4319	23.373	Personal database	GPS	258
Lissotriton vulgaris	Bulgaria: Radanovo	43.3378	25.6786	Personal database	GPS	79
Lissotriton vulgaris	Bulgaria: Ravna	43.0584	23.0219	Personal database	GPS	1244
Lissotriton vulgaris	Bulgaria: Resaliyska Mahala	42.1775	22.6804	Personal database	GPS	951
Lissotriton vulgaris	Bulgaria: Roglets	43.6729	22.9266	Personal database	GPS	136
Lissotriton vulgaris	Bulgaria: Rozino	43.5915	26.8322	Personal database	GPS	343
Lissotriton vulgaris	Bulgaria: Shishmanovo	43.7651	22.5397	Personal database	GPS	249
Lissotriton vulgaris	Bulgaria: Slivnitsa	42.8738	23.0198	Personal database	GPS	626
Lissotriton vulgaris	Bulgaria: Srebarna 1	44.1033	27.0639	Personal database	GPS	13
Lissotriton vulgaris	Bulgaria: Srebarna 2	44.1267	27.0899	Personal database	GPS	17
Lissotriton vulgaris	Bulgaria: Staliyska Mahala	43.72	23.1584	Personal database	GPS	63
Lissotriton vulgaris	Bulgaria: Staro Selo	44.0232	26.5053	Personal database	GPS	16
Lissotriton vulgaris	Bulgaria: Staro Selo 2	44.0265	26.517	Personal database	GPS	13
Lissotriton vulgaris	Bulgaria: Strahilitsa	43.4887	26.9155	Personal database	GPS	452
Lissotriton vulgaris	Bulgaria: Tsarski Izvor	43.2422	25.8982	Personal database	GPS	217
Lissotriton vulgaris	Bulgaria: Tsvetkova Bara	43.1965	23.2032	Personal database	GPS	465
Lissotriton vulgaris	Bulgaria: Valchek	43.776	22.743	Personal database	GPS	195
Lissotriton vulgaris	Bulgaria: Vladaia 1	42.6346	23.1687	Personal database	GPS	1010
Lissotriton vulgaris	Bulgaria: Vladaia 2	42.6453	23.1721	Personal database	GPS	1199
Lissotriton vulgaris	Bulgaria: Vladaia 3	42.6457	23.18	Personal database	GPS	1135
Lissotriton vulgaris	Bulgaria: Vladaia 4	42.6281	23.2289	Personal database	GPS	1198
Lissotriton vulgaris	Bulgaria: Vladaya	42.631	23.1835	Personal database	GPS	881
Lissotriton vulgaris	Bulgaria: Yanyovets	43.5867	22.7788	Personal database	GPS	226
Lissotriton vulgaris	Bulgaria: Yarlovo	42.4894	23.2538	Personal database	GPS	1315
Lissotriton vulgaris	Bulgaria: Yarlovtsi	42.8041	22.5327	Personal database	GPS	792
Lissotriton vulgaris	Bulgaria: Zanozhene	43.1224	23.2395	Personal database	GPS	1676
Lissotriton vulgaris	Bulgaria: Zimevitsa	43.069	23.2589	Personal database	GPS	1296
Lissotriton vulgaris	Bulgaria: Obelya 2 (Sofia)	42.7533	23.2705	Personal database	GPS	532
Lissotriton vulgaris	Bulgaria: Ponora Cave	43.3073	23.5761	Beškov et al. (1967)	Google Earth	286
Lissotriton vulgaris	Bulgaria: Kopitoto Peak	42.637	23.2439	Buresch & Zonkov (1941)	Google Earth	1210
Lissotriton vulgaris	Bulgaria: Gorno Ozirovo (1.1 km N)	43.226	23.3963	Naumov et al. (2016)	Google Earth	402
Lissotriton vulgaris	Bulgaria: Ochindol (3,8 km N)	43.1394	23.4656	Naumov et al. (2016)	Google Earth	1364
Lissotriton vulgaris	Bulgaria: Ochindol (3.7 km N)	43.1392	23.4707	Naumov et al. (2016)	Google Earth	1387
Lissotriton vulgaris	Bulgaria: Ochindol (4,3 km N)	43.1432	23.4868	Naumov et al. (2016)	Google Earth	1375
Lissotriton vulgaris	Bulgaria: Ochindol (4,9 km N)	43.1476	23.4551	Naumov et al. (2016)	Google Earth	1299
Lissotriton vulgaris	Bulgaria: Stoyanovo (1.3 km NE)	43.2649	23.3465	Naumov et al. (2016)	Google Earth	293
Lissotriton vulgaris	Bulgaria: Stoyanovo (2.0 km NE)	43.2678	23.3568	Naumov et al. (2016)	Google Earth	285
Lissotriton vulgaris	Bulgaria: Zgorigrad (0.9 km S)	43.1734	23.5164	Naumov et al. (2016)	Google Earth	701
Lissotriton vulgaris	Bulgaria: Zgorigrad (1.0 km N)	43.1903	23.5208	Naumov et al. (2016)	Google Earth	462
Lissotriton vulgaris	Bulgaria: Zgorigrad (1.3 km SW)	43.172	23.507	Naumov et al. (2016)	Google Earth	560
Lissotriton vulgaris	Bulgaria: Zgorigrad (3.1 km W)	43.1909	23.4814	Naumov et al. (2016)	Google Earth	1004
Lissotriton vulgaris	Bulgaria: Zverino (2.1 km NE)	43.0941	23.58	Naumov et al. (2016)	Google Earth	319
Lissotriton vulgaris	Bulgaria: Blagoevgradska Bistritsa River	42.0305	23.1175	Pulev & Sakelarieva (2009)	Google Earth	496
Lissotriton vulgaris	Bulgaria: South Park	42.6648	23.3072	Stoyanov (2015)	Google Earth	595
Lissotriton vulgaris	Bulgaria: IBW 0915	42.6383	23.1796	Stoyneva & Michev (2007)	Google Earth	925
Lissotriton vulgaris	Bulgaria: IBW 5079	43.0298	23.4369	Stoyneva & Michev (2007)	Google Earth	1157
Lissotriton vulgaris	Bulgaria: IBW 5080	43.0334	23.4406	Stoyneva & Michev (2007)	Google Earth	1157
Lissotriton vulgaris	Bulgaria: IBW 5281	42.6588	23.2582	Stoyneva & Michev (2007)	Google Earth	624
Lissotriton vulgaris	Bulgaria: IBW 5301	42.8278	23.3596	Stoyneva & Michev (2007)	Google Earth	523
Lissotriton vulgaris	Bulgaria: IBW 5611	42.2626	23.2942	Stoyneva & Michev (2007)	Google Earth	1389
Lissotriton vulgaris	Bulgaria: IBW 5723	42.4785	23.2729	Stoyneva & Michev (2007)	Google Earth	1105
Lissotriton vulgaris	Bulgaria: IBW 9751	42.1908	22.6265	Stoyneva & Michev (2007)	Google Earth	1493
Lissotriton vulgaris	Bulgaria: Zemen	42.4839	22.7524	Stoyneva & Michev (2007)	Google Earth	589
Lissotriton vulgaris	Bulgaria: Platoto Place	42.5796	23.2826	Tzankov et al. (2009a)	Google Earth	1992
Lissotriton vulgaris	Bulgaria: Rila	42.1307	23.1277	Tzankov et al. (2011)	Google Earth	596
Lissotriton vulgaris	Bulgaria: Stob	42.0952	23.0631	Tzankov et al. (2011)	Google Earth	485
Lissotriton vulgaris	Bulgaria: Unnamed	42.0611	23.0309	Tzankov et al. (2011)	Google Earth	362
Lissotriton vulgaris	Bulgaria: Boyana Swamp	42.657	23.2583	Tzankov et al. (2014)	Google Earth	700
Lissotriton vulgaris	Bulgaria: FN8211	42.625	23.2112	Tzankov et al. (2014)	Google Earth	1057
Lissotriton vulgaris	Bulgaria: FN8273	42.6412	23.2826	Tzankov et al. (2014)	Google Earth	858
Lissotriton vulgaris	Bulgaria: FN9148	42.5954	23.3679	Tzankov et al. (2014)	Google Earth	814
Lissotriton vulgaris	Bulgaria: Ruse	43.848	25.9487	Undjian (2000)	Google Earth	38
Lissotriton vulgaris	Croatia: Bakić	45.7415	17.6926	Personal database	Google Earth	105
Lissotriton vulgaris	Croatia: Barban	45.0597	14.0436	Personal database	GPS	83
Lissotriton vulgaris	Croatia: Barban1	45.0635	14.0096	Personal database	GPS	230
Lissotriton vulgaris	Croatia: Benkovac	44.0227	15.6275	Personal database	GPS	175
Lissotriton vulgaris	Croatia: Crna Mlaka	45.608	15.724	Personal database	GPS	114
Lissotriton vulgaris	Croatia: Donja Ploča	44.4557	15.6553	Personal database	GPS	617
Lissotriton vulgaris	Croatia: Donji Zemunik	44.1142	15.3634	Personal database	GPS	83
Lissotriton vulgaris	Croatia: Istria Roc	45.3977	14.0509	Personal database	GPS	377
Lissotriton vulgaris	Croatia: Istria Svetvincenant	45.068	13.8765	Personal database	GPS	277
Lissotriton vulgaris	Croatia: Krk	44.9838	14.6523	Personal database	GPS	271
Lissotriton vulgaris	Croatia: Krk1	44.9852	14.6493	Personal database	GPS	194
Lissotriton vulgaris	Croatia: Novi Mihaljevci	45.3912	17.6787	Personal database	GPS	166
Lissotriton vulgaris	Croatia: Popovic Brdo	45.4522	15.6463	Personal database	GPS	139
Lissotriton vulgaris	Croatia: Salakovac	45.0525	14.0869	Personal database	GPS	268
Lissotriton vulgaris	Croatia: Smilčić	44.1278	15.4766	Personal database	GPS	191
Lissotriton vulgaris	Croatia: Srsici	45.1447	14.5481	Personal database	GPS	87
Lissotriton vulgaris	Croatia: Zagrad	44.0696	15.533	Personal database	GPS	169
Lissotriton vulgaris	Croatia: Beli Manastir	45.773	18.611	IBISS	Google Earth	101
Lissotriton vulgaris	Croatia: Brgud	44.037	15.745	IBISS	Google Earth	275
Lissotriton vulgaris	Croatia: Drniš	43.86	16.156	IBISS	Google Earth	319
Lissotriton vulgaris	Croatia: Ilok	45.222	19.375	IBISS	Google Earth	87
Lissotriton vulgaris	Croatia: Istarske Toplice, Istra	45.377	13.883	IBISS	Google Earth	161
Lissotriton vulgaris	Croatia: Jankovac, Papuk	45.522	17.687	IBISS	Google Earth	549
Lissotriton vulgaris	Croatia: Jurandvor, Krk	44.977	14.738	IBISS	Google Earth	69
Lissotriton vulgaris	Croatia: Karlovac	45.493	15.555	IBISS	Google Earth	112
Lissotriton vulgaris	Croatia: Krbavsko Polje	44.537	15.763	IBISS	Google Earth	741
Lissotriton vulgaris	Croatia: Kukuljanovo, Rijeka	45.33	14.52	IBISS	Google Earth	316
Lissotriton vulgaris	Croatia: Lički Osik, Gospić	44.603	15.424	IBISS	Google Earth	571
Lissotriton vulgaris	Croatia: Lipa, Rijeka	45.343	14.426	IBISS	Google Earth	225
Lissotriton vulgaris	Croatia: Mamići, Rijeka	45.359	14.297	IBISS	Google Earth	323
Lissotriton vulgaris	Croatia: Mokro Polje	44.072	16.041	IBISS	Google Earth	267
Lissotriton vulgaris	Croatia: Otok, Sinj	43.683	16.74	IBISS	Google Earth	297
Lissotriton vulgaris	Croatia: Peščenica	45.602	16.168	IBISS	Google Earth	105
Lissotriton vulgaris	Croatia: Peteranec, Koprivnica	46.194	16.887	IBISS	Google Earth	127
Lissotriton vulgaris	Croatia: Plosna, Rijeka	45.347	14.544	IBISS	Google Earth	297
Lissotriton vulgaris	Croatia: Punat, Krk	45.021	14.632	IBISS	Google Earth	6
Lissotriton vulgaris	Croatia: Sinj	43.703	16.637	IBISS	Google Earth	328
Lissotriton vulgaris	Croatia: Smiljan, Gospić	44.564	15.32	IBISS	Google Earth	558
Lissotriton vulgaris	Croatia: Svetvinčenat, Istra	45.088	13.881	IBISS	Google Earth	306
Lissotriton vulgaris	Croatia: Švica, Otočac	44.872	15.173	IBISS	Google Earth	446
Lissotriton vulgaris	Croatia: Turopolje	45.648	16.139	IBISS	Google Earth	103
Lissotriton vulgaris	Croatia: Vrhovine, Otočac	44.851	15.425	IBISS	Google Earth	755
Lissotriton vulgaris	Croatia: 33TWJ4	43.575	15.9297	Sillero et al. (2014)	Center grid	n/a
Lissotriton vulgaris	Croatia: 33TXL2	45.3681	16.5971	Sillero et al. (2014)	Center grid	95
Lissotriton vulgaris	Croatia: 33TXL4	45.3574	17.2352	Sillero et al. (2014)	Center grid	334
Lissotriton vulgaris	Croatia: 33TWM4	46.2751	15.9743	Sillero et al. (2014)	Center grid	372
Lissotriton vulgaris	Croatia: 33TXL3	45.8071	17.2531	Sillero et al. (2014)	Center grid	206
Lissotriton vulgaris	Croatia: 34TCQ1	44.9076	18.784	Sillero et al. (2014)	Center grid	80
Lissotriton vulgaris	Czech Republic: Na Plachtě	50.1884	15.8603	Personal database	GPS	245
Lissotriton vulgaris	Czech Republic: Nosislav	49.0167	16.6667	Personal database	GPS	240
Lissotriton vulgaris	Czech Republic: Orlová	49.8824	18.4514	Personal database	GPS	244
Lissotriton vulgaris	Czech Republic: Praha-Karlín	50.1003	14.4603	Personal database	GPS	183
Lissotriton vulgaris	Czech Republic: Slavhostice	50.3	15.35	Personal database	GPS	282
Lissotriton vulgaris	Czech Republic: 001	50.498	14.6156	AOPK ČR	GPS	302
Lissotriton vulgaris	Czech Republic: 002	49.61	16.2417	AOPK ČR	GPS	534
Lissotriton vulgaris	Czech Republic: 003	49.2223	15.2964	AOPK ČR	GPS	706
Lissotriton vulgaris	Czech Republic: 004	50.3607	15.0892	AOPK ČR	GPS	269
Lissotriton vulgaris	Czech Republic: 005	50.3065	15.5845	AOPK ČR	GPS	265
Lissotriton vulgaris	Czech Republic: 006	49.295	14.0601	AOPK ČR	GPS	384
Lissotriton vulgaris	Czech Republic: 007	50.5148	15.1847	AOPK ČR	GPS	322
Lissotriton vulgaris	Czech Republic: 008	50.0551	13.9167	AOPK ČR	GPS	378
Lissotriton vulgaris	Czech Republic: 009	50.8463	14.6311	AOPK ČR	GPS	593
Lissotriton vulgaris	Czech Republic: 010	50.3075	17.1173	AOPK ČR	GPS	418
Lissotriton vulgaris	Czech Republic: 011	49.5192	17.9059	AOPK ČR	GPS	273
Lissotriton vulgaris	Czech Republic: 012	48.7449	16.8247	AOPK ČR	GPS	188
Lissotriton vulgaris	Czech Republic: 013	49.3411	15.5646	AOPK ČR	GPS	606
Lissotriton vulgaris	Czech Republic: 014	50.3744	16.1677	AOPK ČR	GPS	465
Lissotriton vulgaris	Czech Republic: 015	50.3672	15.7079	AOPK ČR	GPS	378
Lissotriton vulgaris	Czech Republic: 016	49.0348	17.6548	AOPK ČR	GPS	275
Lissotriton vulgaris	Czech Republic: 017	49.9779	13.9121	AOPK ČR	GPS	403
Lissotriton vulgaris	Czech Republic: 018	50.3016	17.1285	AOPK ČR	GPS	373
Lissotriton vulgaris	Czech Republic: 019	48.7457	16.8224	AOPK ČR	GPS	190
Lissotriton vulgaris	Czech Republic: 020	50.4942	16.1067	AOPK ČR	GPS	461
Lissotriton vulgaris	Czech Republic: 021	49.4462	18.1109	AOPK ČR	GPS	504
Lissotriton vulgaris	Czech Republic: 022	49.474	15.6676	AOPK ČR	GPS	510
Lissotriton vulgaris	Czech Republic: 023	49.1326	17.5906	AOPK ČR	GPS	229
Lissotriton vulgaris	Czech Republic: 024	49.1733	15.3566	AOPK ČR	GPS	578
Lissotriton vulgaris	Czech Republic: 025	50.4924	14.6671	AOPK ČR	GPS	318
Lissotriton vulgaris	Czech Republic: 026	50.4588	14.5932	AOPK ČR	GPS	273
Lissotriton vulgaris	Czech Republic: 027	49.9804	14.1974	AOPK ČR	GPS	377
Lissotriton vulgaris	Czech Republic: 028	50.3687	14.4581	AOPK ČR	GPS	158
Lissotriton vulgaris	Czech Republic: 029	49.8509	15.1335	AOPK ČR	GPS	515
Lissotriton vulgaris	Czech Republic: 030	49.8782	15.1024	AOPK ČR	GPS	465
Lissotriton vulgaris	Czech Republic: 031	49.9592	14.9353	AOPK ČR	GPS	422
Lissotriton vulgaris	Czech Republic: 032	50.1339	14.067	AOPK ČR	GPS	420
Lissotriton vulgaris	Czech Republic: 033	50.185	13.992	AOPK ČR	GPS	373
Lissotriton vulgaris	Czech Republic: 034	50.3007	17.0679	AOPK ČR	GPS	424
Lissotriton vulgaris	Czech Republic: 035	49.9933	14.0349	AOPK ČR	GPS	274
Lissotriton vulgaris	Czech Republic: 036	49.8102	18.5816	AOPK ČR	GPS	239
Lissotriton vulgaris	Czech Republic: 037	49.0468	17.4064	AOPK ČR	GPS	175
Lissotriton vulgaris	Czech Republic: 038	49.1614	14.1101	AOPK ČR	GPS	442
Lissotriton vulgaris	Czech Republic: 039	49.8821	15.7842	AOPK ČR	GPS	374
Lissotriton vulgaris	Czech Republic: 040	50.5242	13.6144	AOPK ČR	GPS	267
Lissotriton vulgaris	Czech Republic: 041	50.3151	12.9579	AOPK ČR	GPS	426
Lissotriton vulgaris	Czech Republic: 042	50.0199	17.2853	AOPK ČR	GPS	737
Lissotriton vulgaris	Czech Republic: 043	50.5877	14.3268	AOPK ČR	GPS	228
Lissotriton vulgaris	Czech Republic: 044	50.6887	14.7677	AOPK ČR	GPS	297
Lissotriton vulgaris	Czech Republic: 045	50.0408	12.7358	AOPK ČR	GPS	829
Lissotriton vulgaris	Czech Republic: 046	50.1753	14.1993	AOPK ČR	GPS	276
Lissotriton vulgaris	Czech Republic: 047	49.6248	14.8623	AOPK ČR	GPS	574
Lissotriton vulgaris	Czech Republic: 048	50.0617	13.8274	AOPK ČR	GPS	364
Lissotriton vulgaris	Czech Republic: 049	50.6661	13.641	AOPK ČR	GPS	815
Lissotriton vulgaris	Czech Republic: 050	49.62	13.8252	AOPK ČR	GPS	568
Lissotriton vulgaris	Czech Republic: 051	49.794	17.8592	AOPK ČR	GPS	511
Lissotriton vulgaris	Czech Republic: 052	49.6658	17.77	AOPK ČR	GPS	571
Lissotriton vulgaris	Czech Republic: 053	49.6368	17.8568	AOPK ČR	GPS	276
Lissotriton vulgaris	Czech Republic: 054	50.2559	15.6815	AOPK ČR	GPS	245
Lissotriton vulgaris	Czech Republic: 055	50.6966	15.8465	AOPK ČR	GPS	780
Lissotriton vulgaris	Czech Republic: 056	50.4583	14.5932	AOPK ČR	GPS	345
Lissotriton vulgaris	Czech Republic: 057	49.1638	15.3984	AOPK ČR	GPS	554
Lissotriton vulgaris	Czech Republic: 058	49.8998	15.7906	AOPK ČR	GPS	380
Lissotriton vulgaris	Czech Republic: 059	49.4495	15.853	AOPK ČR	GPS	657
Lissotriton vulgaris	Czech Republic: 060	49.5387	12.6309	AOPK ČR	GPS	782
Lissotriton vulgaris	Czech Republic: 061	49.2039	15.0434	AOPK ČR	GPS	501
Lissotriton vulgaris	Czech Republic: 062	48.827	14.2987	AOPK ČR	GPS	560
Lissotriton vulgaris	Czech Republic: 063	49.6812	14.9087	AOPK ČR	GPS	440
Lissotriton vulgaris	Czech Republic: 064	50.1681	12.5013	AOPK ČR	GPS	523
Lissotriton vulgaris	Czech Republic: 065	50.1683	12.4635	AOPK ČR	GPS	470
Lissotriton vulgaris	Czech Republic: 066	50.2757	12.3791	AOPK ČR	GPS	612
Lissotriton vulgaris	Czech Republic: 067	50.2738	12.9018	AOPK ČR	GPS	442
Lissotriton vulgaris	Czech Republic: 068	50.215	13.1037	AOPK ČR	GPS	806
Lissotriton vulgaris	Czech Republic: 069	50.2729	12.9015	AOPK ČR	GPS	442
Lissotriton vulgaris	Czech Republic: 070	49.9753	12.6116	AOPK ČR	GPS	619
Lissotriton vulgaris	Czech Republic: 071	50.1589	12.3328	AOPK ČR	GPS	506
Lissotriton vulgaris	Czech Republic: 072	49.9531	12.6221	AOPK ČR	GPS	662
Lissotriton vulgaris	Czech Republic: 073	50.5484	13.9056	AOPK ČR	GPS	614
Lissotriton vulgaris	Czech Republic: 074	50.1486	13.1942	AOPK ČR	GPS	572
Lissotriton vulgaris	Czech Republic: 075	49.9426	13.7954	AOPK ČR	GPS	450
Lissotriton vulgaris	Czech Republic: 076	49.9486	13.7208	AOPK ČR	GPS	433
Lissotriton vulgaris	Czech Republic: 077	50.1	14.525	AOPK ČR	GPS	204
Lissotriton vulgaris	Czech Republic: 078	49.8047	18.5665	AOPK ČR	GPS	269
Lissotriton vulgaris	Czech Republic: 079	49.4419	16.0561	AOPK ČR	GPS	564
Lissotriton vulgaris	Czech Republic: 080	49.499	16.0347	AOPK ČR	GPS	556
Lissotriton vulgaris	Czech Republic: 081	50.4901	14.6687	AOPK ČR	GPS	331
Lissotriton vulgaris	Czech Republic: 082	50.245	12.1138	AOPK ČR	GPS	598
Lissotriton vulgaris	Czech Republic: 083	50.3682	13.3473	AOPK ČR	GPS	325
Lissotriton vulgaris	Czech Republic: 084	50.1549	15.6801	AOPK ČR	GPS	260
Lissotriton vulgaris	Czech Republic: 085	49.4451	12.6891	AOPK ČR	GPS	567
Lissotriton vulgaris	Czech Republic: 086	49.1112	15.4041	AOPK ČR	GPS	515
Lissotriton vulgaris	Czech Republic: 087	48.8394	16.4971	AOPK ČR	GPS	172
Lissotriton vulgaris	Czech Republic: 088	49.2267	14.2579	AOPK ČR	GPS	435
Lissotriton vulgaris	Czech Republic: 089	49.0604	14.8763	AOPK ČR	GPS	453
Lissotriton vulgaris	Czech Republic: 090	50.1136	12.3059	AOPK ČR	GPS	454
Lissotriton vulgaris	Czech Republic: 091	50.1093	12.2244	AOPK ČR	GPS	523
Lissotriton vulgaris	Czech Republic: 092	50.6423	13.9551	AOPK ČR	GPS	171
Lissotriton vulgaris	Czech Republic: 093	48.8259	16.3009	AOPK ČR	GPS	210
Lissotriton vulgaris	Czech Republic: 094	49.0104	15.3821	AOPK ČR	GPS	509
Lissotriton vulgaris	Czech Republic: 095	49.012	15.3248	AOPK ČR	GPS	596
Lissotriton vulgaris	Czech Republic: 096	49.1479	15.293	AOPK ČR	GPS	612
Lissotriton vulgaris	Czech Republic: 097	49.6369	14.6987	AOPK ČR	GPS	549
Lissotriton vulgaris	Czech Republic: 098	49.2755	15.1283	AOPK ČR	GPS	624
Lissotriton vulgaris	Czech Republic: 099	49.1131	15.4965	AOPK ČR	GPS	514
Lissotriton vulgaris	Czech Republic: 100	49.1523	13.5726	AOPK ČR	GPS	794
Lissotriton vulgaris	Czech Republic: 101	49.4006	14.6122	AOPK ČR	GPS	471
Lissotriton vulgaris	Czech Republic: 102	49.0731	17.6837	AOPK ČR	GPS	377
Lissotriton vulgaris	Czech Republic: 103	49.0599	15.0388	AOPK ČR	GPS	509
Lissotriton vulgaris	Czech Republic: 104	49.0608	15.0659	AOPK ČR	GPS	545
Lissotriton vulgaris	Czech Republic: 105	49.0803	15.1286	AOPK ČR	GPS	650
Lissotriton vulgaris	Czech Republic: 106	50.0136	12.8125	AOPK ČR	GPS	657
Lissotriton vulgaris	Czech Republic: 107	50.0015	12.8334	AOPK ČR	GPS	660
Lissotriton vulgaris	Czech Republic: 108	50.063	12.8902	AOPK ČR	GPS	678
Lissotriton vulgaris	Czech Republic: 109	50.1659	13.0279	AOPK ČR	GPS	695
Lissotriton vulgaris	Czech Republic: 110	50.2369	12.9199	AOPK ČR	GPS	415
Lissotriton vulgaris	Czech Republic: 111	49.6889	12.9155	AOPK ČR	GPS	450
Lissotriton vulgaris	Czech Republic: 112	49.5553	15.8982	AOPK ČR	GPS	600
Lissotriton vulgaris	Czech Republic: 113	50.6583	13.9	AOPK ČR	GPS	200
Lissotriton vulgaris	Czech Republic: 114	50.1257	12.6536	AOPK ČR	GPS	735
Lissotriton vulgaris	Czech Republic: 115	49.8541	12.8692	AOPK ČR	GPS	567
Lissotriton vulgaris	Czech Republic: 116	49.17	13.7199	AOPK ČR	GPS	730
Lissotriton vulgaris	Czech Republic: 117	49.7326	15.7669	AOPK ČR	GPS	585
Lissotriton vulgaris	Czech Republic: 118	49.8104	15.8055	AOPK ČR	GPS	580
Lissotriton vulgaris	Czech Republic: 119	50.5958	16.1641	AOPK ČR	GPS	503
Lissotriton vulgaris	Czech Republic: 120	49.4722	15.3049	AOPK ČR	GPS	542
Lissotriton vulgaris	Czech Republic: 121	50.0705	14.4214	AOPK ČR	GPS	209
Lissotriton vulgaris	Czech Republic: 122	50.575	14.1263	AOPK ČR	GPS	471
Lissotriton vulgaris	Czech Republic: 123	48.7289	14.5462	AOPK ČR	GPS	600
Lissotriton vulgaris	Czech Republic: 124	50.3406	17.1704	AOPK ČR	GPS	299
Lissotriton vulgaris	Czech Republic: 125	50.3487	17.1663	AOPK ČR	GPS	321
Lissotriton vulgaris	Czech Republic: 126	49.5873	13.8702	AOPK ČR	GPS	544
Lissotriton vulgaris	Czech Republic: 127	49.5909	13.867	AOPK ČR	GPS	544
Lissotriton vulgaris	Czech Republic: 128	49.6016	15.4327	AOPK ČR	GPS	504
Lissotriton vulgaris	Czech Republic: 129	50.2713	14.7751	AOPK ČR	GPS	180
Lissotriton vulgaris	Czech Republic: 130	49.4929	14.9752	AOPK ČR	GPS	579
Lissotriton vulgaris	Czech Republic: 131	50.3432	15.9363	AOPK ČR	GPS	251
Lissotriton vulgaris	Czech Republic: 132	48.7676	16.874	AOPK ČR	GPS	169
Lissotriton vulgaris	Czech Republic: 133	48.809	16.6611	AOPK ČR	GPS	272
Lissotriton vulgaris	Czech Republic: 134	50.3224	17.1698	AOPK ČR	GPS	316
Lissotriton vulgaris	Czech Republic: 135	49.4543	14.6915	AOPK ČR	GPS	508
Lissotriton vulgaris	Czech Republic: 136	49.279	17.4631	AOPK ČR	GPS	187
Lissotriton vulgaris	Czech Republic: 137	50.9326	14.4651	AOPK ČR	GPS	460
Lissotriton vulgaris	Czech Republic: 138	50.2729	14.3917	AOPK ČR	GPS	207
Lissotriton vulgaris	Czech Republic: 139	49.2242	15.519	AOPK ČR	GPS	556
Lissotriton vulgaris	Czech Republic: 140	49.6786	16.3335	AOPK ČR	GPS	621
Lissotriton vulgaris	Czech Republic: 141	49.6866	12.7643	AOPK ČR	GPS	496
Lissotriton vulgaris	Czech Republic: 142	49.4644	12.8416	AOPK ČR	GPS	421
Lissotriton vulgaris	Czech Republic: 143	50.2759	12.4347	AOPK ČR	GPS	659
Lissotriton vulgaris	Czech Republic: 144	50.2009	13.1613	AOPK ČR	GPS	785
Lissotriton vulgaris	Czech Republic: 145	49.6183	17.268	AOPK ČR	GPS	216
Lissotriton vulgaris	Czech Republic: 146	48.9751	17.3241	AOPK ČR	GPS	172
Lissotriton vulgaris	Czech Republic: 147	48.893	14.933	AOPK ČR	GPS	455
Lissotriton vulgaris	Czech Republic: 148	49.6149	13.3281	AOPK ČR	GPS	385
Lissotriton vulgaris	Czech Republic: 149	50.6576	13.9015	AOPK ČR	GPS	200
Lissotriton vulgaris	Czech Republic: 150	49.9771	13.8531	AOPK ČR	GPS	407
Lissotriton vulgaris	Czech Republic: 151	49.5967	17.4166	AOPK ČR	GPS	308
Lissotriton vulgaris	Czech Republic: 152	49.0818	17.1297	AOPK ČR	GPS	307
Lissotriton vulgaris	Czech Republic: 153	49.0941	17.1328	AOPK ČR	GPS	317
Lissotriton vulgaris	Czech Republic: 154	50.0724	14.4234	AOPK ČR	GPS	209
Lissotriton vulgaris	Czech Republic: 155	50.0321	14.7275	AOPK ČR	GPS	390
Lissotriton vulgaris	Czech Republic: 156	50.5778	14.6627	AOPK ČR	GPS	268
Lissotriton vulgaris	Czech Republic: 157	49.9019	15.7818	AOPK ČR	GPS	365
Lissotriton vulgaris	Czech Republic: 158	49.5057	17.7015	AOPK ČR	GPS	327
Lissotriton vulgaris	Czech Republic: 159	50.9939	15.0495	AOPK ČR	GPS	263
Lissotriton vulgaris	Czech Republic: 160	50.0542	14.3005	AOPK ČR	GPS	363
Lissotriton vulgaris	Czech Republic: 161	49.8751	18.1677	AOPK ČR	GPS	214
Lissotriton vulgaris	Czech Republic: 162	49.5797	13.8736	AOPK ČR	GPS	571
Lissotriton vulgaris	Czech Republic: 163	49.9209	12.5826	AOPK ČR	GPS	609
Lissotriton vulgaris	Czech Republic: 164	49.9731	12.9419	AOPK ČR	GPS	665
Lissotriton vulgaris	Czech Republic: 165	49.8426	12.8953	AOPK ČR	GPS	572
Lissotriton vulgaris	Czech Republic: 166	50.204	13.1148	AOPK ČR	GPS	812
Lissotriton vulgaris	Czech Republic: 167	50.2592	12.244	AOPK ČR	GPS	542
Lissotriton vulgaris	Czech Republic: 168	50.1231	12.8088	AOPK ČR	GPS	671
Lissotriton vulgaris	Czech Republic: 169	50.3149	12.1794	AOPK ČR	GPS	585
Lissotriton vulgaris	Czech Republic: 170	49.1805	14.4089	AOPK ČR	GPS	465
Lissotriton vulgaris	Czech Republic: 171	49.9052	14.1899	AOPK ČR	GPS	288
Lissotriton vulgaris	Czech Republic: 172	50.1465	12.6364	AOPK ČR	GPS	473
Lissotriton vulgaris	Czech Republic: 173	50.0584	14.4462	AOPK ČR	GPS	258
Lissotriton vulgaris	Czech Republic: 174	49.4406	18.1496	AOPK ČR	GPS	493
Lissotriton vulgaris	Czech Republic: 175	50.1284	13.5262	AOPK ČR	GPS	475
Lissotriton vulgaris	Czech Republic: 176	49.6007	15.9473	AOPK ČR	GPS	587
Lissotriton vulgaris	Czech Republic: 177	50.6188	14.7601	AOPK ČR	GPS	298
Lissotriton vulgaris	Czech Republic: 178	48.7837	16.1958	AOPK ČR	GPS	192
Lissotriton vulgaris	Czech Republic: 179	50.0695	15.3844	AOPK ČR	GPS	217
Lissotriton vulgaris	Czech Republic: 180	48.7658	16.3029	AOPK ČR	GPS	183
Lissotriton vulgaris	Czech Republic: 181	48.8905	15.8769	AOPK ČR	GPS	438
Lissotriton vulgaris	Czech Republic: 182	49.597	16.0668	AOPK ČR	GPS	750
Lissotriton vulgaris	Czech Republic: 183	48.9352	15.9512	AOPK ČR	GPS	390
Lissotriton vulgaris	Czech Republic: 184	49.9851	17.6044	AOPK ČR	GPS	461
Lissotriton vulgaris	Czech Republic: 185	49.9852	17.3443	AOPK ČR	GPS	668
Lissotriton vulgaris	Czech Republic: 186	50.4927	14.4433	AOPK ČR	GPS	297
Lissotriton vulgaris	Czech Republic: 187	49.3629	13.1403	AOPK ČR	GPS	555
Lissotriton vulgaris	Czech Republic: 188	49.8723	15.6702	AOPK ČR	GPS	562
Lissotriton vulgaris	Czech Republic: 189	50.8197	14.3552	AOPK ČR	GPS	212
Lissotriton vulgaris	Czech Republic: 190	49.0465	15.5084	AOPK ČR	GPS	549
Lissotriton vulgaris	Czech Republic: 191	50.0772	12.3897	AOPK ČR	GPS	456
Lissotriton vulgaris	Czech Republic: 192	50.7722	15.0247	AOPK ČR	GPS	391
Lissotriton vulgaris	Czech Republic: 193	48.9808	14.1694	AOPK ČR	GPS	539
Lissotriton vulgaris	Czech Republic: 194	50.2914	15.7215	AOPK ČR	GPS	282
Lissotriton vulgaris	Czech Republic: 195	50.2936	15.982	AOPK ČR	GPS	264
Lissotriton vulgaris	Czech Republic: 196	50.2857	16.1314	AOPK ČR	GPS	289
Lissotriton vulgaris	Czech Republic: 197	49.4957	17.2738	AOPK ČR	GPS	208
Lissotriton vulgaris	Czech Republic: 198	49.9617	14.2958	AOPK ČR	GPS	285
Lissotriton vulgaris	Czech Republic: 199	49.1364	14.792	AOPK ČR	GPS	419
Lissotriton vulgaris	Czech Republic: 200	50.3497	17.1104	AOPK ČR	GPS	340
Lissotriton vulgaris	Czech Republic: 201	50.9742	15.0863	AOPK ČR	GPS	318
Lissotriton vulgaris	Czech Republic: 202	50.2675	16.2283	AOPK ČR	GPS	409
Lissotriton vulgaris	Czech Republic: 203	50.0724	14.4234	AOPK ČR	GPS	209
Lissotriton vulgaris	Czech Republic: 204	50.6461	14.7934	AOPK ČR	GPS	288
Lissotriton vulgaris	Czech Republic: 205	48.9837	14.9325	AOPK ČR	GPS	480
Lissotriton vulgaris	Czech Republic: 206	50.0531	13.9109	AOPK ČR	GPS	346
Lissotriton vulgaris	Czech Republic: 207	50.2979	12.9163	AOPK ČR	GPS	416
Lissotriton vulgaris	Czech Republic: 208	50.8476	14.9052	AOPK ČR	GPS	312
Lissotriton vulgaris	Czech Republic: 209	48.8875	16.6346	AOPK ČR	GPS	168
Lissotriton vulgaris	Czech Republic: 210	48.8885	17.1587	AOPK ČR	GPS	199
Lissotriton vulgaris	Czech Republic: 211	50.5916	16.0463	AOPK ČR	GPS	511
Lissotriton vulgaris	Czech Republic: 212	49.8109	16.0197	AOPK ČR	GPS	490
Lissotriton vulgaris	Czech Republic: 213	49.8992	15.79	AOPK ČR	GPS	359
Lissotriton vulgaris	Czech Republic: 214	50.5412	16.2804	AOPK ČR	GPS	593
Lissotriton vulgaris	Czech Republic: 215	50.3608	17.189	AOPK ČR	GPS	279
Lissotriton vulgaris	Czech Republic: 216	48.9523	15.9684	AOPK ČR	GPS	370
Lissotriton vulgaris	Czech Republic: 217	49.8636	18.1897	AOPK ČR	GPS	212
Lissotriton vulgaris	Czech Republic: 218	48.6374	16.9338	AOPK ČR	GPS	161
Lissotriton vulgaris	Czech Republic: 219	49.4573	15.9204	AOPK ČR	GPS	558
Lissotriton vulgaris	Czech Republic: 220	49.4573	15.9204	AOPK ČR	GPS	558
Lissotriton vulgaris	Czech Republic: 221	50.2951	16.0674	AOPK ČR	GPS	260
Lissotriton vulgaris	Czech Republic: 222	50.2933	16.0619	AOPK ČR	GPS	264
Lissotriton vulgaris	Czech Republic: 223	50.0171	12.576	AOPK ČR	GPS	562
Lissotriton vulgaris	Czech Republic: 224	50.1932	12.7059	AOPK ČR	GPS	485
Lissotriton vulgaris	Czech Republic: 225	49.9771	13.8531	AOPK ČR	GPS	407
Lissotriton vulgaris	Czech Republic: 226	50.0705	14.4212	AOPK ČR	GPS	209
Lissotriton vulgaris	Czech Republic: 227	49.0016	17.6492	AOPK ČR	GPS	220
Lissotriton vulgaris	Czech Republic: 228	50.6651	14.6073	AOPK ČR	GPS	258
Lissotriton vulgaris	Czech Republic: 229	50.3457	17.1778	AOPK ČR	GPS	308
Lissotriton vulgaris	Czech Republic: 230	50.0705	14.4214	AOPK ČR	GPS	209
Lissotriton vulgaris	Czech Republic: 231	49.0657	13.8935	AOPK ČR	GPS	927
Lissotriton vulgaris	Czech Republic: 232	50.2144	12.604	AOPK ČR	GPS	470
Lissotriton vulgaris	Czech Republic: 233	50.8985	14.549	AOPK ČR	GPS	500
Lissotriton vulgaris	Czech Republic: 234	48.7579	16.8265	AOPK ČR	GPS	191
Lissotriton vulgaris	Czech Republic: 235	50.5262	13.6661	AOPK ČR	GPS	256
Lissotriton vulgaris	Czech Republic: 236	49.6532	12.8961	AOPK ČR	GPS	444
Lissotriton vulgaris	Czech Republic: 237	50.1763	13.7334	AOPK ČR	GPS	385
Lissotriton vulgaris	Czech Republic: 238	50.164	13.8394	AOPK ČR	GPS	469
Lissotriton vulgaris	Czech Republic: 239	50.5223	15.2104	AOPK ČR	GPS	307
Lissotriton vulgaris	Czech Republic: 240	49.3964	15.4292	AOPK ČR	GPS	675
Lissotriton vulgaris	Czech Republic: 241	49.0366	16.6911	AOPK ČR	GPS	185
Lissotriton vulgaris	Czech Republic: 242	49.2547	15.3302	AOPK ČR	GPS	698
Lissotriton vulgaris	Czech Republic: 243	49.2521	17.4544	AOPK ČR	GPS	183
Lissotriton vulgaris	Czech Republic: 244	50.1923	15.5902	AOPK ČR	GPS	246
Lissotriton vulgaris	Czech Republic: 245	49.2345	15.5783	AOPK ČR	GPS	649
Lissotriton vulgaris	Czech Republic: 246	49.9804	15.899	AOPK ČR	GPS	253
Lissotriton vulgaris	Czech Republic: 247	50.4635	14.622	AOPK ČR	GPS	264
Lissotriton vulgaris	Czech Republic: 248	49.9575	14.8206	AOPK ČR	GPS	361
Lissotriton vulgaris	Czech Republic: 249	49.9378	13.9448	AOPK ČR	GPS	456
Lissotriton vulgaris	Czech Republic: 250	50.0118	14.0441	AOPK ČR	GPS	384
Lissotriton vulgaris	Czech Republic: 251	50.2767	14.9937	AOPK ČR	GPS	253
Lissotriton vulgaris	Czech Republic: 252	49.8353	14.9034	AOPK ČR	GPS	427
Lissotriton vulgaris	Czech Republic: 253	49.6061	17.2481	AOPK ČR	GPS	213
Lissotriton vulgaris	Czech Republic: 254	50.9258	15.2363	AOPK ČR	GPS	484
Lissotriton vulgaris	Czech Republic: 255	50.2344	12.2368	AOPK ČR	GPS	594
Lissotriton vulgaris	Czech Republic: 256	50.2525	13.9058	AOPK ČR	GPS	405
Lissotriton vulgaris	Czech Republic: 257	50.0867	13.521	AOPK ČR	GPS	550
Lissotriton vulgaris	Czech Republic: 258	50.0405	14.7566	AOPK ČR	GPS	381
Lissotriton vulgaris	Czech Republic: 259	50.1974	14.4517	AOPK ČR	GPS	283
Lissotriton vulgaris	Czech Republic: 260	50.032	14.7276	AOPK ČR	GPS	390
Lissotriton vulgaris	Czech Republic: 261	49.9424	12.6376	AOPK ČR	GPS	602
Lissotriton vulgaris	Czech Republic: 262	49.8157	14.1931	AOPK ČR	GPS	430
Lissotriton vulgaris	Czech Republic: 263	50.1042	14.7101	AOPK ČR	GPS	228
Lissotriton vulgaris	Czech Republic: 264	50.3014	15.0178	AOPK ČR	GPS	260
Lissotriton vulgaris	Czech Republic: 265	49.3531	13.9537	AOPK ČR	GPS	464
Lissotriton vulgaris	Czech Republic: 266	49.6603	14.957	AOPK ČR	GPS	490
Lissotriton vulgaris	Czech Republic: 267	50.0524	13.7467	AOPK ČR	GPS	454
Lissotriton vulgaris	Czech Republic: 268	50.1227	13.507	AOPK ČR	GPS	477
Lissotriton vulgaris	Czech Republic: 269	49.6214	13.8817	AOPK ČR	GPS	550
Lissotriton vulgaris	Czech Republic: 270	49.1955	15.2939	AOPK ČR	GPS	675
Lissotriton vulgaris	Czech Republic: 271	49.251	15.297	AOPK ČR	GPS	658
Lissotriton vulgaris	Czech Republic: 272	49.1324	15.3167	AOPK ČR	GPS	612
Lissotriton vulgaris	Czech Republic: 273	49.7639	14.0453	AOPK ČR	GPS	535
Lissotriton vulgaris	Czech Republic: 274	50.0055	12.6057	AOPK ČR	GPS	584
Lissotriton vulgaris	Czech Republic: 275	50.8045	14.9866	AOPK ČR	GPS	357
Lissotriton vulgaris	Czech Republic: 276	50.3924	15.8344	AOPK ČR	GPS	407
Lissotriton vulgaris	Czech Republic: 277	50.2986	15.5385	AOPK ČR	GPS	256
Lissotriton vulgaris	Czech Republic: 278	49.4711	15.4481	AOPK ČR	GPS	663
Lissotriton vulgaris	Czech Republic: 279	49.735	15.7602	AOPK ČR	GPS	590
Lissotriton vulgaris	Czech Republic: 280	50.2465	12.4032	AOPK ČR	GPS	519
Lissotriton vulgaris	Czech Republic: 281	50.3477	12.4693	AOPK ČR	GPS	638
Lissotriton vulgaris	Czech Republic: 282	50.1014	12.4689	AOPK ČR	GPS	431
Lissotriton vulgaris	Czech Republic: 283	50.1288	12.9604	AOPK ČR	GPS	693
Lissotriton vulgaris	Czech Republic: 284	50.2501	12.776	AOPK ČR	GPS	420
Lissotriton vulgaris	Czech Republic: 285	50.1342	12.244	AOPK ČR	GPS	515
Lissotriton vulgaris	Czech Republic: 286	50.291	17.1413	AOPK ČR	GPS	465
Lissotriton vulgaris	Czech Republic: 287	50.9354	15.1424	AOPK ČR	GPS	359
Lissotriton vulgaris	Czech Republic: 288	49.9171	13.8243	AOPK ČR	GPS	548
Lissotriton vulgaris	Czech Republic: 289	49.4467	16.0297	AOPK ČR	GPS	563
Lissotriton vulgaris	Czech Republic: 290	50.0157	16.6295	AOPK ČR	GPS	554
Lissotriton vulgaris	Czech Republic: 291	50.1745	14.7818	AOPK ČR	GPS	176
Lissotriton vulgaris	Czech Republic: 292	50.1375	14.4685	AOPK ČR	GPS	347
Lissotriton vulgaris	Czech Republic: 293	49.7533	12.4711	AOPK ČR	GPS	735
Lissotriton vulgaris	Czech Republic: 294	49.1403	13.2415	AOPK ČR	GPS	777
Lissotriton vulgaris	Czech Republic: 295	48.8623	14.8526	AOPK ČR	GPS	461
Lissotriton vulgaris	Czech Republic: 296	49.3481	16.1232	AOPK ČR	GPS	582
Lissotriton vulgaris	Czech Republic: 297	49.3757	16.0992	AOPK ČR	GPS	577
Lissotriton vulgaris	Czech Republic: 298	50.1114	15.1659	AOPK ČR	GPS	196
Lissotriton vulgaris	Czech Republic: 299	50.5288	14.4927	AOPK ČR	GPS	290
Lissotriton vulgaris	Czech Republic: 300	49.8645	17.2782	AOPK ČR	GPS	648
Lissotriton vulgaris	Czech Republic: 301	50.1318	12.315	AOPK ČR	GPS	455
Lissotriton vulgaris	Czech Republic: 302	48.8378	16.2828	AOPK ČR	GPS	182
Lissotriton vulgaris	Czech Republic: 303	49.5334	18.1884	AOPK ČR	GPS	473
Lissotriton vulgaris	Czech Republic: 304	49.1416	15.1762	AOPK ČR	GPS	532
Lissotriton vulgaris	Czech Republic: 305	48.957	15.1999	AOPK ČR	GPS	624
Lissotriton vulgaris	Czech Republic: 306	49.7898	13.646	AOPK ČR	GPS	459
Lissotriton vulgaris	Czech Republic: 307	49.7771	13.5451	AOPK ČR	GPS	472
Lissotriton vulgaris	Czech Republic: 308	48.6069	14.354	AOPK ČR	GPS	738
Lissotriton vulgaris	Czech Republic: 309	50.2351	12.5889	AOPK ČR	GPS	581
Lissotriton vulgaris	Czech Republic: 310	50.6747	13.9868	AOPK ČR	GPS	321
Lissotriton vulgaris	Czech Republic: 311	50.1887	12.271	AOPK ČR	GPS	662
Lissotriton vulgaris	Czech Republic: 312	50.1591	12.3321	AOPK ČR	GPS	506
Lissotriton vulgaris	Czech Republic: 313	50.135	12.223	AOPK ČR	GPS	547
Lissotriton vulgaris	Czech Republic: 314	49.8363	13.4283	AOPK ČR	GPS	360
Lissotriton vulgaris	Czech Republic: 315	49.0916	16.1985	AOPK ČR	GPS	330
Lissotriton vulgaris	Czech Republic: 316	49.8891	13.3447	AOPK ČR	GPS	492
Lissotriton vulgaris	Czech Republic: 317	49.7254	12.9239	AOPK ČR	GPS	502
Lissotriton vulgaris	Czech Republic: 318	49.0385	15.0855	AOPK ČR	GPS	551
Lissotriton vulgaris	Czech Republic: 319	49.0407	15.0715	AOPK ČR	GPS	564
Lissotriton vulgaris	Czech Republic: 320	49.0045	15.1336	AOPK ČR	GPS	618
Lissotriton vulgaris	Czech Republic: 321	50.0709	12.7816	AOPK ČR	GPS	722
Lissotriton vulgaris	Czech Republic: 322	49.9081	13.2181	AOPK ČR	GPS	549
Lissotriton vulgaris	Czech Republic: 323	49.9098	13.1433	AOPK ČR	GPS	570
Lissotriton vulgaris	Czech Republic: 324	49.3278	14.3702	AOPK ČR	GPS	470
Lissotriton vulgaris	Czech Republic: 325	49.3248	14.3858	AOPK ČR	GPS	442
Lissotriton vulgaris	Czech Republic: 326	49.9323	12.6326	AOPK ČR	GPS	634
Lissotriton vulgaris	Czech Republic: 327	50.2058	12.9424	AOPK ČR	GPS	603
Lissotriton vulgaris	Czech Republic: 328	49.1504	14.7852	AOPK ČR	GPS	436
Lissotriton vulgaris	Czech Republic: 329	49.8927	12.7526	AOPK ČR	GPS	588
Lissotriton vulgaris	Czech Republic: 330	49.8637	12.8825	AOPK ČR	GPS	590
Lissotriton vulgaris	Czech Republic: 331	49.009	14.8371	AOPK ČR	GPS	442
Lissotriton vulgaris	Czech Republic: 332	50.0009	14.155	AOPK ČR	GPS	267
Lissotriton vulgaris	Czech Republic: 333	50.3601	17.1912	AOPK ČR	GPS	279
Lissotriton vulgaris	Czech Republic: 334	49.8678	15.6167	AOPK ČR	GPS	398
Lissotriton vulgaris	Czech Republic: 335	50.1868	15.0389	AOPK ČR	GPS	186
Lissotriton vulgaris	Czech Republic: 336	49.1179	15.103	AOPK ČR	GPS	542
Lissotriton vulgaris	Czech Republic: 337	49.4612	14.3334	AOPK ČR	GPS	508
Lissotriton vulgaris	Czech Republic: 338	48.6795	16.9461	AOPK ČR	GPS	165
Lissotriton vulgaris	Czech Republic: 339	50.262	14.6848	AOPK ČR	GPS	184
Lissotriton vulgaris	Czech Republic: 340	49.5038	14.8734	AOPK ČR	GPS	650
Lissotriton vulgaris	Czech Republic: 341	49.2297	13.4521	AOPK ČR	GPS	543
Lissotriton vulgaris	Czech Republic: 342	50.0219	15.3302	AOPK ČR	GPS	203
Lissotriton vulgaris	Czech Republic: 343	50.0615	14.5185	AOPK ČR	GPS	250
Lissotriton vulgaris	Czech Republic: 344	50.1028	15.1641	AOPK ČR	GPS	195
Lissotriton vulgaris	Czech Republic: 345	49.1906	13.6731	AOPK ČR	GPS	663
Lissotriton vulgaris	Czech Republic: 346	50.7389	15.0774	AOPK ČR	GPS	415
Lissotriton vulgaris	Czech Republic: 347	49.6852	16.4797	AOPK ČR	GPS	430
Lissotriton vulgaris	Czech Republic: 348	50.216	14.8293	AOPK ČR	GPS	185
Lissotriton vulgaris	Czech Republic: 349	48.9298	16.6135	AOPK ČR	GPS	170
Lissotriton vulgaris	Czech Republic: 350	48.8212	16.1536	AOPK ČR	GPS	206
Lissotriton vulgaris	Czech Republic: 351	50.4882	16.0554	AOPK ČR	GPS	477
Lissotriton vulgaris	Czech Republic: 352	50.3454	17.1779	AOPK ČR	GPS	308
Lissotriton vulgaris	Czech Republic: 353	50.3322	14.75	AOPK ČR	GPS	229
Lissotriton vulgaris	Czech Republic: 354	50.9647	14.5755	AOPK ČR	GPS	415
Lissotriton vulgaris	Czech Republic: 355	50.4357	14.2021	AOPK ČR	GPS	166
Lissotriton vulgaris	Czech Republic: 356	50.02	13.9936	AOPK ČR	GPS	321
Lissotriton vulgaris	Czech Republic: 357	48.8474	15.9445	AOPK ČR	GPS	407
Lissotriton vulgaris	Czech Republic: 358	48.8371	16.1533	AOPK ČR	GPS	223
Lissotriton vulgaris	Czech Republic: 359	49.577	13.8686	AOPK ČR	GPS	571
Lissotriton vulgaris	Czech Republic: 360	50.7715	14.4942	AOPK ČR	GPS	568
Lissotriton vulgaris	Czech Republic: 361	48.9751	17.3241	AOPK ČR	GPS	172
Lissotriton vulgaris	Czech Republic: 362	49.6967	18.0567	AOPK ČR	GPS	230
Lissotriton vulgaris	Czech Republic: 363	49.2741	17.4834	AOPK ČR	GPS	195
Lissotriton vulgaris	Czech Republic: 364	49.3381	17.3681	AOPK ČR	GPS	191
Lissotriton vulgaris	Czech Republic: 365	50.2087	12.759	AOPK ČR	GPS	471
Lissotriton vulgaris	Czech Republic: 366	49.9781	13.914	AOPK ČR	GPS	403
Lissotriton vulgaris	Czech Republic: 367	49.0171	14.6652	AOPK ČR	GPS	451
Lissotriton vulgaris	Czech Republic: 368	49.9008	15.783	AOPK ČR	GPS	365
Lissotriton vulgaris	Czech Republic: 369	49.5131	13.8665	AOPK ČR	GPS	546
Lissotriton vulgaris	Czech Republic: 370	49.0605	16.42	AOPK ČR	GPS	273
Lissotriton vulgaris	Czech Republic: 371	50.0224	13.9899	AOPK ČR	GPS	324
Lissotriton vulgaris	Czech Republic: 372	49.9256	12.7092	AOPK ČR	GPS	545
Lissotriton vulgaris	Czech Republic: 373	50.341	13.0669	AOPK ČR	GPS	415
Lissotriton vulgaris	Czech Republic: 374	50.3112	12.5307	AOPK ČR	GPS	632
Lissotriton vulgaris	Czech Republic: 375	50.2277	12.1592	AOPK ČR	GPS	655
Lissotriton vulgaris	Czech Republic: 376	50.0912	14.7529	AOPK ČR	GPS	257
Lissotriton vulgaris	Czech Republic: 377	50.0584	14.4463	AOPK ČR	GPS	258
Lissotriton vulgaris	Czech Republic: 378	50.7694	14.4842	AOPK ČR	GPS	567
Lissotriton vulgaris	Czech Republic: 379	50.098	15.7842	AOPK ČR	GPS	225
Lissotriton vulgaris	Czech Republic: 380	49.5955	16.0143	AOPK ČR	GPS	676
Lissotriton vulgaris	Czech Republic: 381	50.6808	13.8937	AOPK ČR	GPS	233
Lissotriton vulgaris	Czech Republic: 382	48.9255	15.8918	AOPK ČR	GPS	414
Lissotriton vulgaris	Czech Republic: 383	49.171	15.3074	AOPK ČR	GPS	658
Lissotriton vulgaris	Czech Republic: 384	50.0284	14.3295	AOPK ČR	GPS	297
Lissotriton vulgaris	Czech Republic: 385	49.9295	16.8797	AOPK ČR	GPS	320
Lissotriton vulgaris	Czech Republic: 386	49.7858	12.5973	AOPK ČR	GPS	566
Lissotriton vulgaris	Czech Republic: 387	50.6523	16.1051	AOPK ČR	GPS	663
Lissotriton vulgaris	Czech Republic: 388	50.5178	16.2842	AOPK ČR	GPS	550
Lissotriton vulgaris	Czech Republic: 389	50.0058	12.4448	AOPK ČR	GPS	560
Lissotriton vulgaris	Czech Republic: 390	49.299	13.1009	AOPK ČR	GPS	465
Lissotriton vulgaris	Czech Republic: 391	50.1159	15.4416	AOPK ČR	GPS	214
Lissotriton vulgaris	Czech Republic: 392	49.8057	18.204	AOPK ČR	GPS	212
Lissotriton vulgaris	Czech Republic: 393	49.6842	18.0196	AOPK ČR	GPS	236
Lissotriton vulgaris	Czech Republic: 394	49.6794	18.029	AOPK ČR	GPS	233
Lissotriton vulgaris	Czech Republic: 395	49.6751	18.0276	AOPK ČR	GPS	233
Lissotriton vulgaris	Czech Republic: 396	49.6822	18.186	AOPK ČR	GPS	257
Lissotriton vulgaris	Czech Republic: 397	48.8901	17.2292	AOPK ČR	GPS	166
Lissotriton vulgaris	Czech Republic: 398	49.1505	16.4616	AOPK ČR	GPS	337
Lissotriton vulgaris	Czech Republic: 399	50.5752	13.564	AOPK ČR	GPS	263
Lissotriton vulgaris	Czech Republic: 400	51.0091	14.4124	AOPK ČR	GPS	416
Lissotriton vulgaris	Czech Republic: 401	50.1392	14.4729	AOPK ČR	GPS	347
Lissotriton vulgaris	Czech Republic: 402	49.7281	15.9779	AOPK ČR	GPS	654
Lissotriton vulgaris	Czech Republic: 403	50.7694	14.4842	AOPK ČR	GPS	567
Lissotriton vulgaris	Czech Republic: 404	50.2984	12.9182	AOPK ČR	GPS	415
Lissotriton vulgaris	Czech Republic: 405	49.1998	16.9241	AOPK ČR	GPS	249
Lissotriton vulgaris	Czech Republic: 406	48.94	16.5882	AOPK ČR	GPS	168
Lissotriton vulgaris	Czech Republic: 407	48.9194	16.5656	AOPK ČR	GPS	169
Lissotriton vulgaris	Czech Republic: 408	50.2156	17.5499	AOPK ČR	GPS	428
Lissotriton vulgaris	Czech Republic: 409	49.2431	15.4316	AOPK ČR	GPS	657
Lissotriton vulgaris	Czech Republic: 410	50.3145	15.8639	AOPK ČR	GPS	255
Lissotriton vulgaris	Czech Republic: 411	49.5579	14.3743	AOPK ČR	GPS	465
Lissotriton vulgaris	Czech Republic: 412	49.2378	16.5369	AOPK ČR	GPS	286
Lissotriton vulgaris	Czech Republic: 413	49.4408	18.1496	AOPK ČR	GPS	493
Lissotriton vulgaris	Czech Republic: 414	49.7511	13.3729	AOPK ČR	GPS	302
Lissotriton vulgaris	Czech Republic: 415	49.0409	16.3698	AOPK ČR	GPS	343
Lissotriton vulgaris	Czech Republic: 416	49.0091	16.6216	AOPK ČR	GPS	175
Lissotriton vulgaris	Czech Republic: 417	50.3012	15.5884	AOPK ČR	GPS	265
Lissotriton vulgaris	Czech Republic: 418	49.9212	14.2135	AOPK ČR	GPS	214
Lissotriton vulgaris	Czech Republic: 419	49.5045	14.6412	AOPK ČR	GPS	505
Lissotriton vulgaris	Czech Republic: 420	49.0258	14.7185	AOPK ČR	GPS	435
Lissotriton vulgaris	Czech Republic: 421	49.6149	13.3281	AOPK ČR	GPS	385
Lissotriton vulgaris	Czech Republic: 422	49.5388	14.1184	AOPK ČR	GPS	462
Lissotriton vulgaris	Czech Republic: 423	49.6761	17.1688	AOPK ČR	GPS	233
Lissotriton vulgaris	Czech Republic: 424	49.931	16.3888	AOPK ČR	GPS	429
Lissotriton vulgaris	Czech Republic: 425	48.7125	14.1208	AOPK ČR	GPS	746
Lissotriton vulgaris	Czech Republic: 426	49.0051	17.7923	AOPK ČR	GPS	347
Lissotriton vulgaris	Denmark: 32UMG1	55.7154	7.80755	Sillero et al. (2014)	Center grid	n/a
Lissotriton vulgaris	Denmark: 32UMG3	55.7205	8.60336	Sillero et al. (2014)	Center grid	30
Lissotriton vulgaris	Denmark: 32UMG4	55.2713	8.60784	Sillero et al. (2014)	Center grid	n/a
Lissotriton vulgaris	Denmark: 32UNF3	54.817	10.1684	Sillero et al. (2014)	Center grid	n/a
Lissotriton vulgaris	Denmark: 32UNG1	55.7205	9.39929	Sillero et al. (2014)	Center grid	90
Lissotriton vulgaris	Denmark: 32UNG2	55.2712	9.39477	Sillero et al. (2014)	Center grid	66
Lissotriton vulgaris	Denmark: 32UNG3	55.7153	10.1951	Sillero et al. (2014)	Center grid	n/a
Lissotriton vulgaris	Denmark: 32UNG4	55.2662	10.1816	Sillero et al. (2014)	Center grid	45
Lissotriton vulgaris	Denmark: 32UPF1	54.807	10.9461	Sillero et al. (2014)	Center grid	n/a
Lissotriton vulgaris	Denmark: 32UPF3	54.7916	11.668	Sillero et al. (2014)	Center grid	6
Lissotriton vulgaris	Denmark: 32UPG1	55.705	10.9905	Sillero et al. (2014)	Center grid	n/a
Lissotriton vulgaris	Denmark: 32UPG2	55.256	10.968	Sillero et al. (2014)	Center grid	n/a
Lissotriton vulgaris	Denmark: 32UPG3	55.6897	11.6946	Sillero et al. (2014)	Center grid	21
Lissotriton vulgaris	Denmark: 32UPG4	55.2407	11.6811	Sillero et al. (2014)	Center grid	9
Lissotriton vulgaris	Denmark: 32VMH3	56.6189	8.59398	Sillero et al. (2014)	Center grid	3
Lissotriton vulgaris	Denmark: 32VMH4	56.1697	8.59874	Sillero et al. (2014)	Center grid	64
Lissotriton vulgaris	Denmark: 32VMJ4	57.0681	8.58909	Sillero et al. (2014)	Center grid	18
Lissotriton vulgaris	Denmark: 32VNH1	56.6189	9.40873	Sillero et al. (2014)	Center grid	36
Lissotriton vulgaris	Denmark: 32VNH2	56.1697	9.40394	Sillero et al. (2014)	Center grid	86
Lissotriton vulgaris	Denmark: 32VNH3	56.6136	10.2233	Sillero et al. (2014)	Center grid	43
Lissotriton vulgaris	Denmark: 32VNH4	56.1645	10.209	Sillero et al. (2014)	Center grid	11
Lissotriton vulgaris	Denmark: 32VNJ1	57.5172	9.41872	Sillero et al. (2014)	Center grid	n/a
Lissotriton vulgaris	Denmark: 32VNJ2	57.0681	9.41365	Sillero et al. (2014)	Center grid	16
Lissotriton vulgaris	Denmark: 32VNJ3	57.5117	10.2532	Sillero et al. (2014)	Center grid	15
Lissotriton vulgaris	Denmark: 32VNJ4	57.0626	10.2381	Sillero et al. (2014)	Center grid	9
Lissotriton vulgaris	Denmark: 32VNK4	57.9607	10.2689	Sillero et al. (2014)	Center grid	n/a
Lissotriton vulgaris	Denmark: 32VPH1	56.6029	11.0375	Sillero et al. (2014)	Center grid	n/a
Lissotriton vulgaris	Denmark: 32VPH2	56.154	11.0137	Sillero et al. (2014)	Center grid	n/a
Lissotriton vulgaris	Denmark: 32VPH4	56.1388	11.7085	Sillero et al. (2014)	Center grid	n/a
Lissotriton vulgaris	Denmark: 32VPJ2	57.0518	11.062	Sillero et al. (2014)	Center grid	n/a
Lissotriton vulgaris	Denmark: 33UUA1	54.7915	12.3344	Sillero et al. (2014)	Center grid	n/a
Lissotriton vulgaris	Denmark: 33UUB1	55.6897	12.3079	Sillero et al. (2014)	Center grid	22
Lissotriton vulgaris	Denmark: 33UUB2	55.2407	12.3213	Sillero et al. (2014)	Center grid	n/a
Lissotriton vulgaris	Denmark: 33UVB4	55.2712	14.6077	Sillero et al. (2014)	Center grid	n/a
Lissotriton vulgaris	Denmark: 33UWA1	54.8219	15.3902	Sillero et al. (2014)	Center grid	n/a
Lissotriton vulgaris	Denmark: 33UWB2	55.2712	15.3946	Sillero et al. (2014)	Center grid	n/a
Lissotriton vulgaris	Denmark: 33VUC2	56.1388	12.294	Sillero et al. (2014)	Center grid	n/a
Lissotriton vulgaris	Estonia: 34VEK1	58.4152	21.4289	Sillero et al. (2014)	Center grid	n/a
Lissotriton vulgaris	Estonia: 34VEK3	58.4095	22.2846	Sillero et al. (2014)	Center grid	38
Lissotriton vulgaris	Estonia: 34VEK4	57.9605	22.2685	Sillero et al. (2014)	Center grid	n/a
Lissotriton vulgaris	Estonia: 34VEL4	58.8584	22.3012	Sillero et al. (2014)	Center grid	n/a
Lissotriton vulgaris	Estonia: 34VFK1	58.3981	23.1397	Sillero et al. (2014)	Center grid	n/a
Lissotriton vulgaris	Estonia: 34VFK2	57.9493	23.1129	Sillero et al. (2014)	Center grid	n/a
Lissotriton vulgaris	Estonia: 34VFK3	58.3829	24.0009	Sillero et al. (2014)	Center grid	27
Lissotriton vulgaris	Estonia: 34VFL1	59.2955	23.1958	Sillero et al. (2014)	Center grid	n/a
Lissotriton vulgaris	Estonia: 34VFL2	58.8468	23.1673	Sillero et al. (2014)	Center grid	n/a
Lissotriton vulgaris	Estonia: 34VFL3	59.2801	24.0009	Sillero et al. (2014)	Center grid	15
Lissotriton vulgaris	Estonia: 34VFL4	58.8316	24.0009	Sillero et al. (2014)	Center grid	22
Lissotriton vulgaris	Estonia: 35VLE3	58.3981	24.8621	Sillero et al. (2014)	Center grid	25
Lissotriton vulgaris	Estonia: 35VLF3	59.2955	24.8061	Sillero et al. (2014)	Center grid	43
Lissotriton vulgaris	Estonia: 35VLF4	58.8468	24.8346	Sillero et al. (2014)	Center grid	61
Lissotriton vulgaris	Estonia: 35VLG4	59.7441	24.7768	Sillero et al. (2014)	Center grid	n/a
Lissotriton vulgaris	Estonia: 35VME1	58.4095	25.7173	Sillero et al. (2014)	Center grid	66
Lissotriton vulgaris	Estonia: 35VME2	57.9605	25.7334	Sillero et al. (2014)	Center grid	88
Lissotriton vulgaris	Estonia: 35VME3	58.4152	26.5729	Sillero et al. (2014)	Center grid	50
Lissotriton vulgaris	Estonia: 35VME4	57.9661	26.5783	Sillero et al. (2014)	Center grid	146
Lissotriton vulgaris	Estonia: 35VMF1	59.3073	25.6836	Sillero et al. (2014)	Center grid	96
Lissotriton vulgaris	Estonia: 35VMF2	58.8584	25.7007	Sillero et al. (2014)	Center grid	69
Lissotriton vulgaris	Estonia: 35VMF3	59.3132	26.5617	Sillero et al. (2014)	Center grid	89
Lissotriton vulgaris	Estonia: 35VMF4	58.8642	26.5674	Sillero et al. (2014)	Center grid	109
Lissotriton vulgaris	Estonia: 35VMG2	59.7561	25.666	Sillero et al. (2014)	Center grid	n/a
Lissotriton vulgaris	Estonia: 35VMG4	59.7622	26.5558	Sillero et al. (2014)	Center grid	n/a
Lissotriton vulgaris	Estonia: 35VNE1	58.4152	27.4287	Sillero et al. (2014)	Center grid	28
Lissotriton vulgaris	Estonia: 35VNE2	57.9661	27.4233	Sillero et al. (2014)	Center grid	69
Lissotriton vulgaris	Estonia: 35VNF1	59.3132	27.44	Sillero et al. (2014)	Center grid	71
Lissotriton vulgaris	Estonia: 35VNF2	58.8642	27.4343	Sillero et al. (2014)	Center grid	28
Lissotriton vulgaris	Finland: 34VDM1	60.205	19.6481	Sillero et al. (2014)	Center grid	n/a
Lissotriton vulgaris	Finland: 34VEM3	60.205	22.3541	Sillero et al. (2014)	Center grid	n/a
Lissotriton vulgaris	Finland: 34VEN1	61.1089	21.4649	Sillero et al. (2014)	Center grid	n/a
Lissotriton vulgaris	Finland: 34VEN2	60.66	21.4584	Sillero et al. (2014)	Center grid	n/a
Lissotriton vulgaris	Finland: 34VEN3	61.1025	22.3923	Sillero et al. (2014)	Center grid	n/a
Lissotriton vulgaris	Finland: 34VEN4	60.6538	22.3729	Sillero et al. (2014)	Center grid	n/a
Lissotriton vulgaris	Finland: 34VEP1	62.0065	21.4786	Sillero et al. (2014)	Center grid	n/a
Lissotriton vulgaris	Finland: 34VEP2	61.5577	21.4716	Sillero et al. (2014)	Center grid	n/a
Lissotriton vulgaris	Finland: 34VEP3	61.9999	22.4331	Sillero et al. (2014)	Center grid	n/a
Lissotriton vulgaris	Finland: 34VEP4	61.5512	22.4124	Sillero et al. (2014)	Center grid	n/a
Lissotriton vulgaris	Finland: 34VEQ1	62.904	21.4931	Sillero et al. (2014)	Center grid	n/a
Lissotriton vulgaris	Finland: 34VEQ2	62.4553	21.4857	Sillero et al. (2014)	Center grid	n/a
Lissotriton vulgaris	Finland: 34VEQ3	62.8972	22.4767	Sillero et al. (2014)	Center grid	n/a
Lissotriton vulgaris	Finland: 34VEQ4	62.4486	22.4546	Sillero et al. (2014)	Center grid	n/a
Lissotriton vulgaris	Finland: 34VER4	63.3458	22.4997	Sillero et al. (2014)	Center grid	n/a
Lissotriton vulgaris	Finland: 34VFM1	60.1927	23.2555	Sillero et al. (2014)	Center grid	n/a
Lissotriton vulgaris	Finland: 34VFM2	59.7441	23.2252	Sillero et al. (2014)	Center grid	n/a
Lissotriton vulgaris	Finland: 34VFM3	60.1767	24.001	Sillero et al. (2014)	Center grid	n/a
Lissotriton vulgaris	Finland: 34VFN1	61.0861	23.4284	Sillero et al. (2014)	Center grid	n/a
Lissotriton vulgaris	Finland: 34VFN2	60.6372	23.4155	Sillero et al. (2014)	Center grid	n/a
Lissotriton vulgaris	Finland: 34VFP1	61.9837	23.4556	Sillero et al. (2014)	Center grid	n/a
Lissotriton vulgaris	Finland: 34VFP2	61.5349	23.4418	Sillero et al. (2014)	Center grid	n/a
Lissotriton vulgaris	Finland: 34VFQ1	62.8813	23.4847	Sillero et al. (2014)	Center grid	n/a
Lissotriton vulgaris	Finland: 34VFQ2	62.4325	23.4699	Sillero et al. (2014)	Center grid	n/a
Lissotriton vulgaris	Finland: 35VLG3	60.1927	24.7465	Sillero et al. (2014)	Center grid	n/a
Lissotriton vulgaris	Finland: 35VLH3	61.086	24.5736	Sillero et al. (2014)	Center grid	n/a
Lissotriton vulgaris	Finland: 35VLH4	60.6372	24.5865	Sillero et al. (2014)	Center grid	n/a
Lissotriton vulgaris	Finland: 35VLJ3	61.9837	24.5464	Sillero et al. (2014)	Center grid	n/a
Lissotriton vulgaris	Finland: 35VLJ4	61.5349	24.5602	Sillero et al. (2014)	Center grid	n/a
Lissotriton vulgaris	Finland: 35VLK3	62.8813	24.5174	Sillero et al. (2014)	Center grid	n/a
Lissotriton vulgaris	Finland: 35VLK4	62.4325	24.5322	Sillero et al. (2014)	Center grid	n/a
Lissotriton vulgaris	Finland: 35VMG1	60.205	25.6478	Sillero et al. (2014)	Center grid	n/a
Lissotriton vulgaris	Finland: 35VMH1	61.1025	25.6097	Sillero et al. (2014)	Center grid	n/a
Lissotriton vulgaris	Finland: 35VMH2	60.6537	25.6291	Sillero et al. (2014)	Center grid	n/a
Lissotriton vulgaris	Finland: 35VMH3	61.1088	26.5371	Sillero et al. (2014)	Center grid	n/a
Lissotriton vulgaris	Finland: 35VMH4	60.66	26.5435	Sillero et al. (2014)	Center grid	n/a
Lissotriton vulgaris	Finland: 35VMJ1	61.9999	25.569	Sillero et al. (2014)	Center grid	n/a
Lissotriton vulgaris	Finland: 35VMJ2	61.5512	25.5897	Sillero et al. (2014)	Center grid	n/a
Lissotriton vulgaris	Finland: 35VMJ3	62.0065	26.5235	Sillero et al. (2014)	Center grid	n/a
Lissotriton vulgaris	Finland: 35VMJ4	61.5577	26.5304	Sillero et al. (2014)	Center grid	n/a
Lissotriton vulgaris	Finland: 35VMK1	62.8971	25.5254	Sillero et al. (2014)	Center grid	n/a
Lissotriton vulgaris	Finland: 35VMK2	62.4485	25.5475	Sillero et al. (2014)	Center grid	n/a
Lissotriton vulgaris	Finland: 35VMK3	62.904	26.509	Sillero et al. (2014)	Center grid	n/a
Lissotriton vulgaris	Finland: 35VMK4	62.4553	26.5164	Sillero et al. (2014)	Center grid	n/a
Lissotriton vulgaris	Finland: 35VML1	63.7943	25.4787	Sillero et al. (2014)	Center grid	n/a
Lissotriton vulgaris	Finland: 35VML2	63.3457	25.5025	Sillero et al. (2014)	Center grid	n/a
Lissotriton vulgaris	Finland: 35VNH1	61.1088	27.4647	Sillero et al. (2014)	Center grid	n/a
Lissotriton vulgaris	Finland: 35VNH2	60.66	27.4582	Sillero et al. (2014)	Center grid	n/a
Lissotriton vulgaris	Finland: 35VNH3	61.1025	28.3921	Sillero et al. (2014)	Center grid	n/a
Lissotriton vulgaris	Finland: 35VNJ1	62.0065	27.4783	Sillero et al. (2014)	Center grid	n/a
Lissotriton vulgaris	Finland: 35VNJ2	61.5577	27.4714	Sillero et al. (2014)	Center grid	n/a
Lissotriton vulgaris	Finland: 35VNJ3	61.9999	28.4329	Sillero et al. (2014)	Center grid	n/a
Lissotriton vulgaris	Finland: 35VNJ4	61.5512	28.4121	Sillero et al. (2014)	Center grid	n/a
Lissotriton vulgaris	Finland: 35VNK1	62.904	27.4929	Sillero et al. (2014)	Center grid	n/a
Lissotriton vulgaris	Finland: 35VNK2	62.4553	27.4855	Sillero et al. (2014)	Center grid	n/a
Lissotriton vulgaris	Finland: 35VNK3	62.8971	28.4765	Sillero et al. (2014)	Center grid	n/a
Lissotriton vulgaris	Finland: 35VNK4	62.4485	28.4543	Sillero et al. (2014)	Center grid	n/a
Lissotriton vulgaris	Finland: 35VNL1	63.8014	27.5085	Sillero et al. (2014)	Center grid	n/a
Lissotriton vulgaris	Finland: 35VPJ1	61.9837	29.4554	Sillero et al. (2014)	Center grid	n/a
Lissotriton vulgaris	Finland: 35VPJ2	61.5349	29.4416	Sillero et al. (2014)	Center grid	n/a
Lissotriton vulgaris	Finland: 35VPK1	62.8812	29.4845	Sillero et al. (2014)	Center grid	n/a
Lissotriton vulgaris	Finland: 35VPK2	62.4325	29.4697	Sillero et al. (2014)	Center grid	n/a
Lissotriton vulgaris	Finland: 35VPL1	63.7786	29.5156	Sillero et al. (2014)	Center grid	n/a
Lissotriton vulgaris	Finland: 35VPL2	63.3299	29.4998	Sillero et al. (2014)	Center grid	n/a
Lissotriton vulgaris	Finland: 35WLM3	64.6759	24.453	Sillero et al. (2014)	Center grid	n/a
Lissotriton vulgaris	Finland: 35WMN2	65.1397	25.4021	Sillero et al. (2014)	Center grid	n/a
Lissotriton vulgaris	Finland: 35WNM2	64.25	27.5167	Sillero et al. (2014)	Center grid	n/a
Lissotriton vulgaris	Finland: 35WNM4	64.2428	28.5479	Sillero et al. (2014)	Center grid	n/a
Lissotriton vulgaris	Finland: 35WNN4	65.1397	28.5999	Sillero et al. (2014)	Center grid	n/a
Lissotriton vulgaris	Finland: 35WPN2	65.1225	29.5655	Sillero et al. (2014)	Center grid	n/a
Lissotriton vulgaris	Finland: 36VUQ3	62.8812	30.5172	Sillero et al. (2014)	Center grid	n/a
Lissotriton vulgaris	Finland: 36VUQ4	62.4325	30.5319	Sillero et al. (2014)	Center grid	n/a
Lissotriton vulgaris	Finland: 36VUR4	63.3299	30.5019	Sillero et al. (2014)	Center grid	n/a
Lissotriton vulgaris	Finland: 35VMG3	60.2111	26.5498	Sillero et al. (2014)	Center grid	n/a
Lissotriton vulgaris	Finland: 36WUS4	64.2272	30.4697	Sillero et al. (2014)	Center grid	n/a
Lissotriton vulgaris	France: Ambleteuse	50.78	1.61	Personal database	GPS	39
Lissotriton vulgaris	France: Mayenne	48.3	0.6	Personal database	GPS	131
Lissotriton vulgaris	France: 30TVT3	47.6288	-3.33139	Sillero et al. (2014)	Center grid	n/a
Lissotriton vulgaris	France: 30TWT1	47.6288	-2.66589	Sillero et al. (2014)	Center grid	7
Lissotriton vulgaris	France: 30TWT2	47.1789	-2.66872	Sillero et al. (2014)	Center grid	n/a
Lissotriton vulgaris	France: 30TWT4	47.1751	-2.00893	Sillero et al. (2014)	Center grid	39
Lissotriton vulgaris	France: 30TXS1	46.7177	-1.36311	Sillero et al. (2014)	Center grid	85
Lissotriton vulgaris	France: 30TXS3	46.7065	-0.709354	Sillero et al. (2014)	Center grid	223
Lissotriton vulgaris	France: 30TXT1	47.6172	-1.33524	Sillero et al. (2014)	Center grid	69
Lissotriton vulgaris	France: 30TXT2	47.1675	-1.34935	Sillero et al. (2014)	Center grid	18
Lissotriton vulgaris	France: 30TXT3	47.6056	-0.670366	Sillero et al. (2014)	Center grid	30
Lissotriton vulgaris	France: 30TXT4	47.1561	-0.690094	Sillero et al. (2014)	Center grid	214
Lissotriton vulgaris	France: 30TYS2	46.2432	0.00127063	Sillero et al. (2014)	Center grid	128
Lissotriton vulgaris	France: 30TYT1	47.5918	0.00130294	Sillero et al. (2014)	Center grid	85
Lissotriton vulgaris	France: 30TYT2	47.1423	0.00129191	Sillero et al. (2014)	Center grid	79
Lissotriton vulgaris	France: 30UVU3	48.5284	-3.33722	Sillero et al. (2014)	Center grid	186
Lissotriton vulgaris	France: 30UWA4	49.8735	-1.95483	Sillero et al. (2014)	Center grid	n/a
Lissotriton vulgaris	France: 30UWU1	48.5284	-2.66001	Sillero et al. (2014)	Center grid	31
Lissotriton vulgaris	France: 30UWU2	48.0786	-2.66299	Sillero et al. (2014)	Center grid	58
Lissotriton vulgaris	France: 30UWU3	48.5244	-1.98288	Sillero et al. (2014)	Center grid	0
Lissotriton vulgaris	France: 30UWU4	48.0747	-1.99178	Sillero et al. (2014)	Center grid	92
Lissotriton vulgaris	France: 30UWV3	49.4238	-1.96442	Sillero et al. (2014)	Center grid	n/a
Lissotriton vulgaris	France: 30UXA2	49.8651	-1.25927	Sillero et al. (2014)	Center grid	n/a
Lissotriton vulgaris	France: 30UXU1	48.5165	-1.30598	Sillero et al. (2014)	Center grid	142
Lissotriton vulgaris	France: 30UXU2	48.0668	-1.32079	Sillero et al. (2014)	Center grid	94
Lissotriton vulgaris	France: 30UXU3	48.5045	-0.629435	Sillero et al. (2014)	Center grid	143
Lissotriton vulgaris	France: 30UXU4	48.0551	-0.650152	Sillero et al. (2014)	Center grid	80
Lissotriton vulgaris	France: 30UXV1	49.4156	-1.27523	Sillero et al. (2014)	Center grid	20
Lissotriton vulgaris	France: 30UXV2	48.966	-1.29079	Sillero et al. (2014)	Center grid	117
Lissotriton vulgaris	France: 30UXV3	49.4033	-0.586437	Sillero et al. (2014)	Center grid	n/a
Lissotriton vulgaris	France: 30UXV4	48.9539	-0.608203	Sillero et al. (2014)	Center grid	278
Lissotriton vulgaris	France: 30UYU1	48.4905	0.00132578	Sillero et al. (2014)	Center grid	199
Lissotriton vulgaris	France: 30UYU2	48.0412	0.00131423	Sillero et al. (2014)	Center grid	85
Lissotriton vulgaris	France: 30UYV1	49.3888	0.00134982	Sillero et al. (2014)	Center grid	n/a
Lissotriton vulgaris	France: 30UYV2	48.9397	0.00133769	Sillero et al. (2014)	Center grid	101
Lissotriton vulgaris	France: 31TCL1	45.8072	0.749032	Sillero et al. (2014)	Center grid	264
Lissotriton vulgaris	France: 31TCM1	46.7065	0.711916	Sillero et al. (2014)	Center grid	133
Lissotriton vulgaris	France: 31TCM3	46.7177	1.36568	Sillero et al. (2014)	Center grid	122
Lissotriton vulgaris	France: 31TCN1	47.6056	0.672972	Sillero et al. (2014)	Center grid	142
Lissotriton vulgaris	France: 31TCN2	47.156	0.692678	Sillero et al. (2014)	Center grid	120
Lissotriton vulgaris	France: 31TCN3	47.6171	1.33785	Sillero et al. (2014)	Center grid	115
Lissotriton vulgaris	France: 31TCN4	47.1674	1.35193	Sillero et al. (2014)	Center grid	149
Lissotriton vulgaris	France: 31TDM1	46.7252	2.01977	Sillero et al. (2014)	Center grid	198
Lissotriton vulgaris	France: 31TDM3	46.7289	2.67405	Sillero et al. (2014)	Center grid	184
Lissotriton vulgaris	France: 31TDN2	47.175	2.01152	Sillero et al. (2014)	Center grid	108
Lissotriton vulgaris	France: 31TDN3	47.6287	2.66849	Sillero et al. (2014)	Center grid	151
Lissotriton vulgaris	France: 31TEM1	46.7289	3.32839	Sillero et al. (2014)	Center grid	228
Lissotriton vulgaris	France: 31TEM2	46.2789	3.3257	Sillero et al. (2014)	Center grid	242
Lissotriton vulgaris	France: 31TEM3	46.7251	3.98268	Sillero et al. (2014)	Center grid	366
Lissotriton vulgaris	France: 31TEM4	46.2752	3.9746	Sillero et al. (2014)	Center grid	315
Lissotriton vulgaris	France: 31TEN1	47.6287	3.33399	Sillero et al. (2014)	Center grid	252
Lissotriton vulgaris	France: 31TEN2	47.1788	3.33116	Sillero et al. (2014)	Center grid	233
Lissotriton vulgaris	France: 31TEN3	47.6248	3.99942	Sillero et al. (2014)	Center grid	275
Lissotriton vulgaris	France: 31TEN4	47.175	3.99094	Sillero et al. (2014)	Center grid	543
Lissotriton vulgaris	France: 31TFL1	45.818	4.6102	Sillero et al. (2014)	Center grid	294
Lissotriton vulgaris	France: 31TFL2	45.3682	4.59738	Sillero et al. (2014)	Center grid	1075
Lissotriton vulgaris	France: 31TFL3	45.8072	5.25337	Sillero et al. (2014)	Center grid	198
Lissotriton vulgaris	France: 31TFL4	45.3575	5.23544	Sillero et al. (2014)	Center grid	333
Lissotriton vulgaris	France: 31TFM1	46.7177	4.63676	Sillero et al. (2014)	Center grid	343
Lissotriton vulgaris	France: 31TFM2	46.2679	4.62332	Sillero et al. (2014)	Center grid	548
Lissotriton vulgaris	France: 31TFM3	46.7064	5.29052	Sillero et al. (2014)	Center grid	197
Lissotriton vulgaris	France: 31TFN1	47.6171	4.66463	Sillero et al. (2014)	Center grid	414
Lissotriton vulgaris	France: 31TFN3	47.6055	5.32951	Sillero et al. (2014)	Center grid	263
Lissotriton vulgaris	France: 31TFN4	47.156	5.30978	Sillero et al. (2014)	Center grid	182
Lissotriton vulgaris	France: 31TGL2	45.3438	5.77771	Sillero et al. (2014)	Center grid	844
Lissotriton vulgaris	France: 31TGM1	46.6927	6.00116	Sillero et al. (2014)	Center grid	864
Lissotriton vulgaris	France: 31TGM2	46.2431	6.00115	Sillero et al. (2014)	Center grid	465
Lissotriton vulgaris	France: 31TGN1	47.5917	6.00118	Sillero et al. (2014)	Center grid	235
Lissotriton vulgaris	France: 31TGN2	47.1423	6.00116	Sillero et al. (2014)	Center grid	394
Lissotriton vulgaris	France: 31UCP2	48.0551	0.652781	Sillero et al. (2014)	Center grid	123
Lissotriton vulgaris	France: 31UCP3	48.5164	1.30863	Sillero et al. (2014)	Center grid	222
Lissotriton vulgaris	France: 31UCP4	48.0668	1.32342	Sillero et al. (2014)	Center grid	106
Lissotriton vulgaris	France: 31UCQ1	49.4033	0.589137	Sillero et al. (2014)	Center grid	126
Lissotriton vulgaris	France: 31UCQ2	48.9539	0.610879	Sillero et al. (2014)	Center grid	192
Lissotriton vulgaris	France: 31UCQ3	49.4156	1.27793	Sillero et al. (2014)	Center grid	149
Lissotriton vulgaris	France: 31UCQ4	48.966	1.29347	Sillero et al. (2014)	Center grid	141
Lissotriton vulgaris	France: 31UCR2	49.8526	0.566852	Sillero et al. (2014)	Center grid	n/a
Lissotriton vulgaris	France: 31UCR4	49.8651	1.262	Sillero et al. (2014)	Center grid	157
Lissotriton vulgaris	France: 31UDP1	48.5244	1.98553	Sillero et al. (2014)	Center grid	155
Lissotriton vulgaris	France: 31UDP2	48.0746	1.9944	Sillero et al. (2014)	Center grid	124
Lissotriton vulgaris	France: 31UDP3	48.5284	2.66266	Sillero et al. (2014)	Center grid	47
Lissotriton vulgaris	France: 31UDP4	48.0785	2.66561	Sillero et al. (2014)	Center grid	91
Lissotriton vulgaris	France: 31UDQ1	49.4238	1.96712	Sillero et al. (2014)	Center grid	100
Lissotriton vulgaris	France: 31UDQ2	48.9741	1.97644	Sillero et al. (2014)	Center grid	56
Lissotriton vulgaris	France: 31UDQ3	49.4279	2.65654	Sillero et al. (2014)	Center grid	69
Lissotriton vulgaris	France: 31UDQ4	48.9781	2.65964	Sillero et al. (2014)	Center grid	72
Lissotriton vulgaris	France: 31UDR1	50.323	1.94775	Sillero et al. (2014)	Center grid	95
Lissotriton vulgaris	France: 31UDR2	49.8734	1.95756	Sillero et al. (2014)	Center grid	126
Lissotriton vulgaris	France: 31UDR3	50.3273	2.6501	Sillero et al. (2014)	Center grid	104
Lissotriton vulgaris	France: 31UDR4	49.8776	2.65336	Sillero et al. (2014)	Center grid	76
Lissotriton vulgaris	France: 31UDS4	50.7769	2.64675	Sillero et al. (2014)	Center grid	71
Lissotriton vulgaris	France: 31UEP1	48.5284	3.33987	Sillero et al. (2014)	Center grid	137
Lissotriton vulgaris	France: 31UEP2	48.0785	3.33689	Sillero et al. (2014)	Center grid	178
Lissotriton vulgaris	France: 31UEP3	48.5244	4.01699	Sillero et al. (2014)	Center grid	105
Lissotriton vulgaris	France: 31UEP4	48.0746	4.0081	Sillero et al. (2014)	Center grid	137
Lissotriton vulgaris	France: 31UEQ1	49.4279	3.34603	Sillero et al. (2014)	Center grid	152
Lissotriton vulgaris	France: 31UEQ2	48.9781	3.34291	Sillero et al. (2014)	Center grid	55
Lissotriton vulgaris	France: 31UEQ3	49.4238	4.03546	Sillero et al. (2014)	Center grid	59
Lissotriton vulgaris	France: 31UEQ4	48.9741	4.02611	Sillero et al. (2014)	Center grid	112
Lissotriton vulgaris	France: 31UER1	50.3272	3.35252	Sillero et al. (2014)	Center grid	40
Lissotriton vulgaris	France: 31UER2	49.8776	3.34924	Sillero et al. (2014)	Center grid	131
Lissotriton vulgaris	France: 31UER3	50.323	4.05487	Sillero et al. (2014)	Center grid	137
Lissotriton vulgaris	France: 31UER4	49.8734	4.04504	Sillero et al. (2014)	Center grid	165
Lissotriton vulgaris	France: 31UFP1	48.5164	4.6939	Sillero et al. (2014)	Center grid	120
Lissotriton vulgaris	France: 31UFP2	48.0668	4.67909	Sillero et al. (2014)	Center grid	348
Lissotriton vulgaris	France: 31UFP3	48.5044	5.37044	Sillero et al. (2014)	Center grid	361
Lissotriton vulgaris	France: 31UFP4	48.055	5.34972	Sillero et al. (2014)	Center grid	410
Lissotriton vulgaris	France: 31UFQ1	49.4155	4.72464	Sillero et al. (2014)	Center grid	141
Lissotriton vulgaris	France: 31UFQ2	48.966	4.70908	Sillero et al. (2014)	Center grid	210
Lissotriton vulgaris	France: 31UFQ3	49.4032	5.41343	Sillero et al. (2014)	Center grid	225
Lissotriton vulgaris	France: 31UFQ4	48.9538	5.39167	Sillero et al. (2014)	Center grid	261
Lissotriton vulgaris	France: 31UFR2	49.865	4.7406	Sillero et al. (2014)	Center grid	137
Lissotriton vulgaris	France: 31UGP1	48.4904	6.0012	Sillero et al. (2014)	Center grid	279
Lissotriton vulgaris	France: 31UGP2	48.0411	6.00119	Sillero et al. (2014)	Center grid	285
Lissotriton vulgaris	France: 31UGQ1	49.3888	6.00122	Sillero et al. (2014)	Center grid	342
Lissotriton vulgaris	France: 31UGQ2	48.9397	6.00121	Sillero et al. (2014)	Center grid	262
Lissotriton vulgaris	France: 32TLR2	45.3575	6.76682	Sillero et al. (2014)	Center grid	2979
Lissotriton vulgaris	France: 32TLS2	46.2568	6.73057	Sillero et al. (2014)	Center grid	1377
Lissotriton vulgaris	France: 32TLT1	47.6055	6.67284	Sillero et al. (2014)	Center grid	451
Lissotriton vulgaris	France: 32TLT2	47.156	6.69255	Sillero et al. (2014)	Center grid	967
Lissotriton vulgaris	France: 32TLT3	47.6171	7.33772	Sillero et al. (2014)	Center grid	366
Lissotriton vulgaris	France: 32ULU1	48.5044	6.63196	Sillero et al. (2014)	Center grid	260
Lissotriton vulgaris	France: 32ULU2	48.055	6.65265	Sillero et al. (2014)	Center grid	711
Lissotriton vulgaris	France: 32ULU3	48.5164	7.30849	Sillero et al. (2014)	Center grid	391
Lissotriton vulgaris	France: 32ULU4	48.0667	7.32328	Sillero et al. (2014)	Center grid	207
Lissotriton vulgaris	France: 32ULV2	48.9538	6.61075	Sillero et al. (2014)	Center grid	251
Lissotriton vulgaris	France: 32ULV4	48.966	7.29333	Sillero et al. (2014)	Center grid	336
Lissotriton vulgaris	France: 32UMV2	48.974	7.9763	Sillero et al. (2014)	Center grid	175
Lissotriton vulgaris	Germany: 32TMT1	47.6248	8.00293	Sillero et al. (2014)	Center grid	728
Lissotriton vulgaris	Germany: 32TNT3	47.6248	9.99928	Sillero et al. (2014)	Center grid	697
Lissotriton vulgaris	Germany: 32TPT1	47.617	10.6645	Sillero et al. (2014)	Center grid	844
Lissotriton vulgaris	Germany: 32TPT3	47.6055	11.3294	Sillero et al. (2014)	Center grid	970
Lissotriton vulgaris	Germany: 32ULA1	50.2982	6.44793	Sillero et al. (2014)	Center grid	574
Lissotriton vulgaris	Germany: 32ULA2	49.8525	6.56672	Sillero et al. (2014)	Center grid	255
Lissotriton vulgaris	Germany: 32ULA3	50.3145	7.24552	Sillero et al. (2014)	Center grid	258
Lissotriton vulgaris	Germany: 32ULA4	49.865	7.26186	Sillero et al. (2014)	Center grid	680
Lissotriton vulgaris	Germany: 32ULB1	51.1972	6.42757	Sillero et al. (2014)	Center grid	79
Lissotriton vulgaris	Germany: 32ULB2	50.7477	6.43788	Sillero et al. (2014)	Center grid	219
Lissotriton vulgaris	Germany: 32ULB3	51.2133	7.21158	Sillero et al. (2014)	Center grid	287
Lissotriton vulgaris	Germany: 32ULB4	50.7639	7.22877	Sillero et al. (2014)	Center grid	104
Lissotriton vulgaris	Germany: 32ULC2	51.6466	6.417	Sillero et al. (2014)	Center grid	23
Lissotriton vulgaris	Germany: 32ULC3	52.112	7.17583	Sillero et al. (2014)	Center grid	65
Lissotriton vulgaris	Germany: 32ULC4	51.6627	7.19393	Sillero et al. (2014)	Center grid	62
Lissotriton vulgaris	Germany: 32ULD4	52.5612	7.15724	Sillero et al. (2014)	Center grid	20
Lissotriton vulgaris	Germany: 32ULE4	53.4597	7.11856	Sillero et al. (2014)	Center grid	-2
Lissotriton vulgaris	Germany: 32ULV1	49.4032	6.589	Sillero et al. (2014)	Center grid	304
Lissotriton vulgaris	Germany: 32ULV3	49.4155	7.2778	Sillero et al. (2014)	Center grid	424
Lissotriton vulgaris	Germany: 32UMA1	50.323	7.94761	Sillero et al. (2014)	Center grid	232
Lissotriton vulgaris	Germany: 32UMA2	49.8734	7.95742	Sillero et al. (2014)	Center grid	118
Lissotriton vulgaris	Germany: 32UMA3	50.3272	8.64996	Sillero et al. (2014)	Center grid	467
Lissotriton vulgaris	Germany: 32UMA4	49.8775	8.65322	Sillero et al. (2014)	Center grid	147
Lissotriton vulgaris	Germany: 32UMB1	51.2221	7.92724	Sillero et al. (2014)	Center grid	222
Lissotriton vulgaris	Germany: 32UMB2	50.7725	7.93756	Sillero et al. (2014)	Center grid	277
Lissotriton vulgaris	Germany: 32UMB3	51.2264	8.64318	Sillero et al. (2014)	Center grid	561
Lissotriton vulgaris	Germany: 32UMB4	50.7768	8.64661	Sillero et al. (2014)	Center grid	261
Lissotriton vulgaris	Germany: 32UMC1	52.121	7.90579	Sillero et al. (2014)	Center grid	60
Lissotriton vulgaris	Germany: 32UMC2	51.6715	7.91665	Sillero et al. (2014)	Center grid	70
Lissotriton vulgaris	Germany: 32UMC3	52.1255	8.63604	Sillero et al. (2014)	Center grid	96
Lissotriton vulgaris	Germany: 32UMC4	51.676	8.63966	Sillero et al. (2014)	Center grid	114
Lissotriton vulgaris	Germany: 32UMD1	53.0198	7.88318	Sillero et al. (2014)	Center grid	9
Lissotriton vulgaris	Germany: 32UMD2	52.5704	7.89464	Sillero et al. (2014)	Center grid	35
Lissotriton vulgaris	Germany: 32UMD3	53.0245	8.62852	Sillero et al. (2014)	Center grid	10
Lissotriton vulgaris	Germany: 32UMD4	52.575	8.63233	Sillero et al. (2014)	Center grid	35
Lissotriton vulgaris	Germany: 32UME2	53.4692	7.87142	Sillero et al. (2014)	Center grid	-2
Lissotriton vulgaris	Germany: 32UME3	53.9233	8.62059	Sillero et al. (2014)	Center grid	n/a
Lissotriton vulgaris	Germany: 32UME4	53.4739	8.6246	Sillero et al. (2014)	Center grid	-4
Lissotriton vulgaris	Germany: 32UMF3	54.822	8.61221	Sillero et al. (2014)	Center grid	n/a
Lissotriton vulgaris	Germany: 32UMU1	48.5243	7.9854	Sillero et al. (2014)	Center grid	168
Lissotriton vulgaris	Germany: 32UMU2	48.0746	7.99427	Sillero et al. (2014)	Center grid	668
Lissotriton vulgaris	Germany: 32UMU3	48.5283	8.66252	Sillero et al. (2014)	Center grid	543
Lissotriton vulgaris	Germany: 32UMU4	48.0785	8.66548	Sillero et al. (2014)	Center grid	688
Lissotriton vulgaris	Germany: 32UMV1	49.4237	7.96698	Sillero et al. (2014)	Center grid	391
Lissotriton vulgaris	Germany: 32UMV3	49.4278	8.6564	Sillero et al. (2014)	Center grid	111
Lissotriton vulgaris	Germany: 32UMV4	48.9781	8.6595	Sillero et al. (2014)	Center grid	301
Lissotriton vulgaris	Germany: 32UNA1	50.3272	9.35238	Sillero et al. (2014)	Center grid	340
Lissotriton vulgaris	Germany: 32UNA2	49.8775	9.3491	Sillero et al. (2014)	Center grid	384
Lissotriton vulgaris	Germany: 32UNA3	50.3229	10.0547	Sillero et al. (2014)	Center grid	314
Lissotriton vulgaris	Germany: 32UNA4	49.8733	10.0449	Sillero et al. (2014)	Center grid	276
Lissotriton vulgaris	Germany: 32UNB1	51.2264	9.3592	Sillero et al. (2014)	Center grid	304
Lissotriton vulgaris	Germany: 32UNB2	50.7768	9.35575	Sillero et al. (2014)	Center grid	336
Lissotriton vulgaris	Germany: 32UNB3	51.222	10.0751	Sillero et al. (2014)	Center grid	387
Lissotriton vulgaris	Germany: 32UNB4	50.7725	10.0648	Sillero et al. (2014)	Center grid	347
Lissotriton vulgaris	Germany: 32UNC1	52.1255	9.36639	Sillero et al. (2014)	Center grid	212
Lissotriton vulgaris	Germany: 32UNC2	51.676	9.36275	Sillero et al. (2014)	Center grid	237
Lissotriton vulgaris	Germany: 32UNC3	52.121	10.0966	Sillero et al. (2014)	Center grid	156
Lissotriton vulgaris	Germany: 32UNC4	51.6715	10.0857	Sillero et al. (2014)	Center grid	155
Lissotriton vulgaris	Germany: 32UND1	53.0245	9.37396	Sillero et al. (2014)	Center grid	48
Lissotriton vulgaris	Germany: 32UND2	52.575	9.37012	Sillero et al. (2014)	Center grid	74
Lissotriton vulgaris	Germany: 32UND3	53.0198	10.1193	Sillero et al. (2014)	Center grid	97
Lissotriton vulgaris	Germany: 32UND4	52.5704	10.1078	Sillero et al. (2014)	Center grid	36
Lissotriton vulgaris	Germany: 32UNE1	53.9233	9.38195	Sillero et al. (2014)	Center grid	0
Lissotriton vulgaris	Germany: 32UNE2	53.4739	9.3779	Sillero et al. (2014)	Center grid	27
Lissotriton vulgaris	Germany: 32UNE3	53.9184	10.1432	Sillero et al. (2014)	Center grid	40
Lissotriton vulgaris	Germany: 32UNE4	53.4691	10.1311	Sillero et al. (2014)	Center grid	-1
Lissotriton vulgaris	Germany: 32UNF1	54.822	9.39038	Sillero et al. (2014)	Center grid	42
Lissotriton vulgaris	Germany: 32UNF2	54.3726	9.3861	Sillero et al. (2014)	Center grid	-4
Lissotriton vulgaris	Germany: 32UNF4	54.3677	10.1556	Sillero et al. (2014)	Center grid	7
Lissotriton vulgaris	Germany: 32UNU1	48.5283	9.33973	Sillero et al. (2014)	Center grid	392
Lissotriton vulgaris	Germany: 32UNU2	48.0785	9.33676	Sillero et al. (2014)	Center grid	588
Lissotriton vulgaris	Germany: 32UNU3	48.5243	10.0169	Sillero et al. (2014)	Center grid	569
Lissotriton vulgaris	Germany: 32UNU4	48.0746	10.008	Sillero et al. (2014)	Center grid	614
Lissotriton vulgaris	Germany: 32UNV1	49.4278	9.34589	Sillero et al. (2014)	Center grid	339
Lissotriton vulgaris	Germany: 32UNV2	48.9781	9.34277	Sillero et al. (2014)	Center grid	339
Lissotriton vulgaris	Germany: 32UNV3	49.4237	10.0353	Sillero et al. (2014)	Center grid	439
Lissotriton vulgaris	Germany: 32UNV4	48.974	10.026	Sillero et al. (2014)	Center grid	503
Lissotriton vulgaris	Germany: 32UPA1	50.3144	10.7568	Sillero et al. (2014)	Center grid	358
Lissotriton vulgaris	Germany: 32UPA2	49.865	10.7405	Sillero et al. (2014)	Center grid	332
Lissotriton vulgaris	Germany: 32UPA3	50.2981	11.5544	Sillero et al. (2014)	Center grid	650
Lissotriton vulgaris	Germany: 32UPA4	49.8524	11.4356	Sillero et al. (2014)	Center grid	426
Lissotriton vulgaris	Germany: 32UPB1	51.2133	10.7908	Sillero et al. (2014)	Center grid	336
Lissotriton vulgaris	Germany: 32UPB2	50.7639	10.7736	Sillero et al. (2014)	Center grid	597
Lissotriton vulgaris	Germany: 32UPB3	51.1971	11.5748	Sillero et al. (2014)	Center grid	170
Lissotriton vulgaris	Germany: 32UPB4	50.7476	11.5645	Sillero et al. (2014)	Center grid	179
Lissotriton vulgaris	Germany: 32UPC1	52.1119	10.8266	Sillero et al. (2014)	Center grid	126
Lissotriton vulgaris	Germany: 32UPC2	51.6626	10.8085	Sillero et al. (2014)	Center grid	602
Lissotriton vulgaris	Germany: 32UPC3	52.096	11.5963	Sillero et al. (2014)	Center grid	61
Lissotriton vulgaris	Germany: 32UPC4	51.6466	11.5854	Sillero et al. (2014)	Center grid	205
Lissotriton vulgaris	Germany: 32UPD1	53.0104	10.8643	Sillero et al. (2014)	Center grid	93
Lissotriton vulgaris	Germany: 32UPD2	52.5612	10.8452	Sillero et al. (2014)	Center grid	77
Lissotriton vulgaris	Germany: 32UPD3	52.9947	11.6189	Sillero et al. (2014)	Center grid	17
Lissotriton vulgaris	Germany: 32UPD4	52.5453	11.6074	Sillero et al. (2014)	Center grid	81
Lissotriton vulgaris	Germany: 32UPE1	53.9088	10.9041	Sillero et al. (2014)	Center grid	5
Lissotriton vulgaris	Germany: 32UPE2	53.4596	10.8839	Sillero et al. (2014)	Center grid	32
Lissotriton vulgaris	Germany: 32UPE3	53.8932	11.6428	Sillero et al. (2014)	Center grid	53
Lissotriton vulgaris	Germany: 32UPE4	53.4439	11.6307	Sillero et al. (2014)	Center grid	34
Lissotriton vulgaris	Germany: 32UPF2	54.3579	10.9248	Sillero et al. (2014)	Center grid	15
Lissotriton vulgaris	Germany: 32UPF4	54.3424	11.6552	Sillero et al. (2014)	Center grid	n/a
Lissotriton vulgaris	Germany: 32UPU1	48.5163	10.6938	Sillero et al. (2014)	Center grid	454
Lissotriton vulgaris	Germany: 32UPU2	48.0667	10.6789	Sillero et al. (2014)	Center grid	599
Lissotriton vulgaris	Germany: 32UPU3	48.5044	11.3703	Sillero et al. (2014)	Center grid	487
Lissotriton vulgaris	Germany: 32UPU4	48.0549	11.3496	Sillero et al. (2014)	Center grid	611
Lissotriton vulgaris	Germany: 32UPV1	49.4155	10.7245	Sillero et al. (2014)	Center grid	385
Lissotriton vulgaris	Germany: 32UPV2	48.9659	10.7089	Sillero et al. (2014)	Center grid	486
Lissotriton vulgaris	Germany: 32UPV3	49.4031	11.4133	Sillero et al. (2014)	Center grid	532
Lissotriton vulgaris	Germany: 32UPV4	48.9538	11.3915	Sillero et al. (2014)	Center grid	375
Lissotriton vulgaris	Germany: 32UQA2	49.8376	12.0011	Sillero et al. (2014)	Center grid	640
Lissotriton vulgaris	Germany: 32UQU1	48.4904	12.0011	Sillero et al. (2014)	Center grid	405
Lissotriton vulgaris	Germany: 32UQU2	48.0411	12.001	Sillero et al. (2014)	Center grid	584
Lissotriton vulgaris	Germany: 32UQV1	49.3887	12.0011	Sillero et al. (2014)	Center grid	416
Lissotriton vulgaris	Germany: 32UQV2	48.9396	12.0011	Sillero et al. (2014)	Center grid	401
Lissotriton vulgaris	Germany: 33UUA2	54.3424	12.3472	Sillero et al. (2014)	Center grid	n/a
Lissotriton vulgaris	Germany: 33UUA3	54.807	13.0563	Sillero et al. (2014)	Center grid	n/a
Lissotriton vulgaris	Germany: 33UUA4	54.3579	13.0776	Sillero et al. (2014)	Center grid	5
Lissotriton vulgaris	Germany: 33UUP1	48.5044	12.6318	Sillero et al. (2014)	Center grid	469
Lissotriton vulgaris	Germany: 33UUP2	48.0549	12.6525	Sillero et al. (2014)	Center grid	532
Lissotriton vulgaris	Germany: 33UUP3	48.5163	13.3083	Sillero et al. (2014)	Center grid	357
Lissotriton vulgaris	Germany: 33UUQ2	48.9538	12.6106	Sillero et al. (2014)	Center grid	331
Lissotriton vulgaris	Germany: 33UUS1	51.1971	12.4274	Sillero et al. (2014)	Center grid	140
Lissotriton vulgaris	Germany: 33UUS2	50.7476	12.4377	Sillero et al. (2014)	Center grid	359
Lissotriton vulgaris	Germany: 33UUS3	51.2132	13.2114	Sillero et al. (2014)	Center grid	180
Lissotriton vulgaris	Germany: 33UUT1	52.096	12.406	Sillero et al. (2014)	Center grid	151
Lissotriton vulgaris	Germany: 33UUT2	51.6466	12.4168	Sillero et al. (2014)	Center grid	77
Lissotriton vulgaris	Germany: 33UUT3	52.1119	13.1757	Sillero et al. (2014)	Center grid	49
Lissotriton vulgaris	Germany: 33UUT4	51.6626	13.1938	Sillero et al. (2014)	Center grid	81
Lissotriton vulgaris	Germany: 33UUU1	52.9946	12.3834	Sillero et al. (2014)	Center grid	48
Lissotriton vulgaris	Germany: 33UUU2	52.5453	12.3948	Sillero et al. (2014)	Center grid	40
[truncated: 3,789 more rows]
